# Supplementary material
Source: PubMed Central journal article supplement (PMC5538892)
Supplement: NIHMS883868-supplement-Supplemental.pdf [file NIHMS883868-supplement-Supplemental.pdf]

# ClusPro-DC: Dimer Classification by the Cluspro Server for Protein-Protein Docking

## Supplemental Information

### Content

#### Supplemental Results and Discussion

Selecting the threshold T for discrimination between biological and crystallographic dimers

Impact of small interface on prediction success rate

Application to Transient Complexes

#### Supplemental Figures

**Table S1.** Training set PDB entries

**Table S2.** Interface area, number of near-native structures, and inferred probability of being a biological dimer for the proteins in the training set

**Table S3.** Threshold versus the Matthew correlation coefficient (MCC)

**Table S4.** Classification of training set dimers by three methods

**Table S5.** Classification of training set monomers by three methods

**Table S6.** Interface area, number of near-native structures, and inferred probability of being a biological dimer for the proteins in the DC Bio and DC Xtal sets

**Table S7.** Classification of DC Bio set by three methods

**Table S8.** Classification of DC Xtal set by three methods

**Table S9.** Interface area, number of near-native structures, and inferred probability of being a biological dimer for the proteins in the test set

**Table S10.** Classification of test set dimers by three methods

**Table S11.** Classification of test set monomers by three methods

**Table S12.** Interface area, number of near-native structures, and inferred probability of being a biological dimer for the proteins in the difficult set

**Table S13.** Classification of difficult set dimers by three methods

**Table S14.** Classification of test set monomers by three methods

**Table S15.** Small interface area results

**Table S16.** Interface area, number of near-native structures, and inferred probability of being a biological dimer for the transitional homodimers by Noreen and Thornton [1]

**Table S17.** Biological activity and classification the transitional homodimers by Noreen and Thornton [1] using three methods

**Table S18.** Classification of the transitional homodimers by Noreen and Thornton [1] using three methods: Summary

**Table S19.** Transitional complexes: Interface area, number of near-native structures, and inferred probability of being a biological dimer for the proteins in the weak homodimer set by Dey et al. [2]

**Table S20.** Interface area, number of near-native structures, and inferred probability of being a biological dimer for the proteins in the “others” homodimer set by Dey et al. [2]

**Table S21.** Classification of the weak set of dimers by Dey et al. [2]

**Table S22.** Classification of the “others” set of dimers by by Dey et al. [2]

**Table S23.** Classification of the weak set of dimers by Dey et al. [2] using three methods: Summary

**Table S24.** Classification of the “others” set of dimers by Dey et al. [2] using three methods: Summary

### **Supplemental Figures**

**Figure S1.** Probability of biological dimer for combined training and test sets

**Figure S2.** Analysis of CAPRI target T70 (Modulator protein MzrA, PDB ID 4pwu).

**Figure S3.** Results of the analysis of the interaction between chains A and B in CAPRI target T70 (Modulator protein MzrA, PDB ID 4pwu)

**Figure S4.** Results of the analysis of the interaction between chains A and C in CAPRI target T70

### **Supplemental References**

## Supplementary Results and Discussion

### Selecting the threshold $T$ for discrimination between biological and crystallographic dimers

As described in the main text and shown in **Fig. 2c**, based on the receiver operating characteristic (ROC) curve  $T = 33$  appears to be a reasonable choice for the threshold number of hits to distinguish between crystallographic and biological dimers. In good agreement with this selection, at  $N_{nn} = 33$  the probability  $P$  of being a biological dimer is between 0.48 and 0.52, depending on the level of smoothing of the probability curve, and we select  $P = 0.5$  as the probability threshold between crystallographic and biological dimers. The predicted probability values are not very sensitive to the changes in the training set. **Fig. S1** shows the fraction of biological dimers as a function of  $N_{nn}$  and the smoothed probability curve, now based on unified training and difficult test set, thus including 345 rather than 209 proteins. The curve based on the training set (**Fig. 2b**), and the one based on the combination of training and difficult test sets (**Fig. S1**) are very similar, and the probability  $P$  of being biological at the threshold  $T = 33$  remains 0.5, the value we use for dimer discrimination throughout the paper. As mentioned, the same threshold value also yields the maximum Matthew correlation coefficient (**Table S3**).

### Impact of Small Interface on Prediction Success Rate

It is well known that the interface area is a very important factor for the discrimination between crystallographic and biological dimers as crystallographic interfaces are generally smaller ( $<1000 \text{ \AA}^2$ ) than biologically relevant ones. However, some of the biological interfaces are also small, which makes discrimination difficult. Since docking programs are in general less successful in predicting complexes with small interface areas, it was suggested by one of the reviewers that the successful identification of monomers might be a result of the inability of docking to identify correct small interfaces. In order to investigate this potential artifact, we have analyzed ClusPro, PISA, and EPPIC results for several interface-area ranges. The analysis was performed on the test set (783 proteins). Predictions were separately analyzed for interface areas below 600, 800, and  $1000 \text{ \AA}^2$  (**Table S15**). Results show that the identification of small interface area biological dimers is indeed difficult, and for  $<600 \text{ \AA}^2$  interface the success rate with ClusPro is only 23.5% (4 out of the 17 cases). However, EPPIC and PISA have exactly the same success rate, thus the low success rate is not caused by the failure of docking. In addition, since the overall percentage of biological dimers with such small interface is low (17 out of 783, thus 2.17%), the overall success rate is over 90%, in spite of the inability to correctly identify most of the dimers. For interface areas below 800 and  $1000 \text{ \AA}^2$  finding biological dimers is still difficult, and all three methods still produce relatively weak results, with less than 50% success rates in all but one cases. However, ClusPro actually yields better discrimination for biological dimers than the other two methods (**Table S15**), again confirming that the failures are not due to the difficulty of docking.

### Application to Transient Complexes

Transient protein–protein complexes dissociate and associate readily, often depending on the physiological condition or environment, and this behavior frequently plays an important role in biological processes. It is expected that determining the state of such complexes under normal conditions is fairly difficult. We applied the three methods studied in this paper to the sets of transient homomultimers collected by Nooren and Thornton [1] and by Dey et al. [2]. As shown in **Table S16**, the average interface area is  $855.1 \text{ \AA}^2$ , and only 3 of the 24 complexes by Nooren and Thornton [1] have interface area exceeding  $1000 \text{ \AA}^2$ . Based on Cluspro, the average probability of being a dimer is 0.68, thus slightly shifted toward the dimer state. In **Table S17** we investigate the relationship between the biological active form as provided by Nooren and Thornton, and the assignment of multimeric state by ClusPro, EPPIC, and PISA. The function of the first 3 proteins in the Table (Lambda phage cro, corynebacterium diphtheria tox repressor, and mouse nuclear factor  $\kappa\text{B}$  (NF $\kappa\text{B}$  P50 and P65, each with several structures) is DNA binding, and these proteins are active as dimers. In good agreement with this function, ClusPro predicts predominantly dimeric form for all but one (1nfk)

structures. According to EPPIC, the same structure and one more (5cro) are monomers. PISA predicts two NF $\kappa$ B structures as monomers, and does not reach conclusion in two more cases. In spite of these differences, all three programs reveal that most of the structures are homodimers. The next six proteins in Table S17 (interleukin-8, stromal cell-derived factor 1 $\alpha$ , monocyte chemoattractant protein 1, stem cell factor cytokine, ciliary neurotrophic factor, and insulin) participate in extracellular, signaling, most likely acting in both monomeric and dimeric forms. Accordingly, ClusPro predict dimerization probabilities between 0.12 and 0.7. The biological active forms are somewhat uncertain for the remaining proteins in Table S17, and ClusPro predictions also vary, but in many cases are close to 0.5, reflecting the uncertainty of dimerization state assignment. As shown in **Table S18**, the three methods predict very similar percentages being in dimeric form.

To study the properties of transient homodimers, Dey et al. [2] built a list of 315 PDB entries containing the atomic coordinates of proteins shown by experiment to be homodimers in solution and in the crystal. Then, they identified cases where the literature indicates that the dimer is in equilibrium with the monomer; the 42 proteins shown in **Table S19** constitute a set of dimers marked “weak” to indicate that they dissociate easily. As for the set by Nooren and Thornton [1], the average interface area is small (817.2  $\text{\AA}^2$ ), and only 7 of the 42 complexes have interface area exceeding 1000  $\text{\AA}^2$ . The average probability of being a biological dimer is 0.54, indicating almost the same frequency of dimeric and monomeric states. In contrast, the remaining 273 “others” type homodimers, listed in Table S20, have average surface area of 1922.8  $\text{\AA}^2$ , thus more than twice as large. The average probability of being a biological dimer is 0.75. As shown in **Tables S23** and **S24**, in the weak set all three methods predicts around 50 of biological dimers, whereas in the “others” set the fraction is about 85%. In both cases ClusPro predicts slightly more dimers than the other two methods.

| <b>Table S1. Training set PDB entries</b>                |      |      |      |      |      |      |      |      |      |
|----------------------------------------------------------|------|------|------|------|------|------|------|------|------|
| <b>A. Biological homodimers<sup>a</sup></b>              |      |      |      |      |      |      |      |      |      |
| 12as                                                     | 1a3c | 1a4i | 1a4u | 1aa7 | 1ad3 | 1ade | 1af5 | 1afw | 1ajs |
| 1vlb                                                     | 1amk | 1aor | 1aq6 | 1auo | 1b3a | 1b5e | 1b67 | 1b8a | 1b8j |
| 1bam                                                     | 1bbh | 1bd0 | 1bif | 1biq | 1bis | 1bjw | 1bkp | 1bmd | 1brw |
| 1bsl                                                     | 1bsr | 1buo | 1bxg | 1bxk | 1cdc | 1cg2 | 1chm | 1cmb | 1cnz |
| 1coz                                                     | 1csh | 1ctt | 1cvu | 1czj | 1daa | 1dor | 1dpg | 1dqs | 1dxg |
| 1e98                                                     | 1ebh | 1f13 | 1fip | 1fro | 1gvp | 1hhp | 1hjr | 1hss | 1hxp |
| 1icw                                                     | 1imb | 1isa | 1ivy | 1jhg | 1jsg | 1kba | 1kpf | 1lyn | 1m6p |
| 1mkb                                                     | 1mor | 1nox | 1nse | 1nsy | 1oac | 1opy | 1pgt | 1pre | 1qfh |
| 1qhi                                                     | 1qr2 | 1r2f | 1reg | 1rfb | 1rpo | 1ses | 1slt | 1smn | 1smt |
| 1sox                                                     | 1tc1 | 1tox | 1trk | 1uby | 1utg | 1vfr | 1vok | 1wtl | 1xso |
| 2arc                                                     | 2ccy | 2hdh | 2ilk | 2lig | 2mcg | 2nac | 2ohx | 2spc | 2sqc |
| 2tct                                                     | 2tgi | 3dap | 3sdh | 3ssi | 4kbp | 5csm | 5rub | 8prk | 9wga |
| <b>B. Monomers (crystallographic dimers)<sup>b</sup></b> |      |      |      |      |      |      |      |      |      |
| 13pk                                                     | 1a7v | 1ad5 | 1afk | 1ag9 | 1ah7 | 1ako | 1amu | 1atl | 1aw7 |
| 1ayl                                                     | 1b1j | 1b3j | 1bc2 | 1bea | 1bin | 1bkz | 1bs2 | 1byo | 1c02 |
| 1caq                                                     | 1ck7 | 1cki | 1clu | 1cqx | 1dsu | 1dys | 1e0s | 1ehy | 1epa |
| 1ewf                                                     | 1feh | 1fgk | 1fjm | 1fkd | 1fmt | 1g2a | 1gar | 1gjm | 1hf8 |
| 2j5x                                                     | 1ilr | 1kpt | 1kwa | 1mpg | 1mss | 1naw | 1np4 | 1pbg | 1pda |
| 1ppo                                                     | 1qaz | 1qci | 1qdm | 1qha | 1qjp | 1qme | 1qpa | 1qtq | 1rb3 |
| 1rhs                                                     | 1rne | 1shk | 1the | 1tht | 1toa | 1ton | 1urp | 1vbt | 1xgs |
| 256b                                                     | 256l | 2acy | 2atj | 2bc2 | 2bls | 2erc | 2g3p | 2ihl | 2mbr |
| 2scp                                                     | 2shp | 2tps | 2ugi | 3mht | 3pmg | 5tss | 830c | 8pti |      |

<sup>a</sup> Biological homodimers from Baskaran et al. [3]

<sup>b</sup> Monomers (crystallographic dimers) from Baskaran et al. [4]

**Table S2.** Interface area, number of near-native structures, and inferred probability of being a biological dimer for the proteins in the training set<sup>a,b</sup>

| Biological dimers |                                  |     |                     | Monomers (Crystallographic dimers) |                                  |     |                     |
|-------------------|----------------------------------|-----|---------------------|------------------------------------|----------------------------------|-----|---------------------|
| PDB ID            | Interface area (Å <sup>2</sup> ) | Nnn | Probability (dimer) | PDB ID                             | Interface area (Å <sup>2</sup> ) | Nnn | Probability (dimer) |
| 12as              | 1878.1                           | 156 | 0.84                | 13pk                               | 1367.4                           | 81  | 0.77                |
| 1a3c              | 989.1                            | 173 | 0.85                | 1a7v                               | 547.8                            | 13  | 0.29                |
| 1a4i              | 1354.6                           | 114 | 0.82                | 1ad5                               | 1053.1                           | 9   | 0.24                |
| 1a4u              | 2525.1                           | 195 | 0.89                | 1afk                               | 818.5                            | 4   | 0.18                |
| 1aa7              | 1093.8                           | 46  | 0.60                | 1ag9                               | 390.2                            | 0   | 0.12                |
| 1ad3              | 3940.1                           | 39  | 0.55                | 1ah7                               | 949.4                            | 21  | 0.39                |
| 1ade              | 2699.0                           | 107 | 0.81                | 1ako                               | 843.3                            | 0   | 0.12                |
| 1af5              | 851.3                            | 0   | 0.12                | 1amu                               | 679.6                            | 0   | 0.12                |
| 1afw              | 2388.7                           | 123 | 0.82                | 1atl                               | 621.2                            | 0   | 0.12                |
| 1ajs              | 3436.9                           | 74  | 0.74                | 1aw7                               | 1145.9                           | 5   | 0.19                |
| 1vlb              | 1187.2                           | 145 | 0.83                | 1ayl                               | 910.2                            | 16  | 0.33                |
| 1amk              | 1467.8                           | 205 | 0.93                | 1b1j                               | 722.8                            | 178 | 0.86                |
| 1aor              | 1209.9                           | 19  | 0.36                | 1b3j                               | 1630.4                           | 102 | 0.81                |
| 1aq6              | 2220.5                           | 176 | 0.86                | 1bc2                               | 640.6                            | 0   | 0.12                |
| 1auo              | 663.7                            | 0   | 0.12                | 1bea                               | 530.1                            | 0   | 0.12                |
| 1b3a              | 733.0                            | 200 | 0.91                | 1bin                               | 553.7                            | 0   | 0.12                |
| 1b5e              | 2527.4                           | 117 | 0.82                | 1bkz                               | 742.8                            | 144 | 0.83                |
| 1b67              | 1595.9                           | 283 | 1.00                | 1bs2                               | 1113.6                           | 31  | 0.49                |
| 1b8a              | 4375.3                           | 103 | 0.81                | 1byo                               | 483.6                            | 0   | 0.12                |
| 1b8j              | 3790.5                           | 94  | 0.79                | 1c02                               | 866.0                            | 66  | 0.71                |
| 1bam              | 750.0                            | 128 | 0.83                | 1caq                               | 643.3                            | 0   | 0.12                |
| 1bbh              | 765.0                            | 271 | 1.00                | 1ck7                               | 1320.9                           | 0   | 0.12                |
| 1bd0              | 3042.4                           | 98  | 0.80                | 1cki                               | 1690.6                           | 133 | 0.83                |
| 1bif              | 889.7                            | 6   | 0.20                | 1clu                               | 749.1                            | 0   | 0.12                |
| 1biq              | 3012.6                           | 99  | 0.80                | 1cqz                               | 1109.5                           | 0   | 0.12                |
| 1bis              | 1478.5                           | 205 | 0.93                | 1dsu                               | 635.4                            | 1   | 0.13                |
| 1bjw              | 2945.7                           | 70  | 0.73                | 1dys                               | 765.3                            | 25  | 0.43                |
| 1bkp              | 2206.0                           | 142 | 0.83                | 1e0s                               | 859.7                            | 0   | 0.12                |
| 1bmd              | 1590.4                           | 253 | 1.00                | 1ehy                               | 696.4                            | 92  | 0.79                |
| 1brw              | 1060.5                           | 249 | 1.00                | 1epa                               | 769.4                            | 0   | 0.12                |
| 1bsl              | 1893.9                           | 158 | 0.84                | 1ewf                               | 947.4                            | 0   | 0.12                |
| 1bsr              | 1895.4                           | 277 | 1.00                | 1feh                               | 1561.1                           | 10  | 0.26                |
| 1buo              | 1927.6                           | 165 | 0.84                | 1fgk                               | 828.5                            | 2   | 0.15                |
| 1bxg              | 1039.6                           | 71  | 0.73                | 1fjm                               | 641.7                            | 0   | 0.12                |
| 1bxk              | 1276.6                           | 111 | 0.82                | 1fkf                               | 629.5                            | 0   | 0.12                |
| 1cdc              | 3837.9                           | 70  | 0.73                | 1fmt                               | 962.3                            | 30  | 0.48                |
| 1cg2              | 1298.3                           | 73  | 0.74                | 1g2a                               | 573.6                            | 0   | 0.12                |
| 1chm              | 3230.1                           | 70  | 0.73                | 1gar                               | 784.8                            | 0   | 0.12                |
| 1cmb              | 1796.3                           | 481 | 1.00                | 1gjm                               | 895.8                            | 0   | 0.12                |
| 1cnz              | 2444.9                           | 107 | 0.81                | 1hf8                               | 1002.5                           | 127 | 0.83                |
| 1coz              | 1053.1                           | 192 | 0.89                | 2j5x                               | 560.3                            | 0   | 0.12                |
| 1csh              | 4995.4                           | 61  | 0.69                | 1ilr                               | 572.2                            | 0   | 0.12                |
| 1ctt              | 1933.3                           | 134 | 0.83                | 1kpt                               | 432.9                            | 9   | 0.24                |
| 1cvu              | 2444.7                           | 26  | 0.44                | 1kwa                               | 599.4                            | 0   | 0.12                |
| 1czj              | 741.3                            | 7   | 0.22                | 1mpg                               | 987.2                            | 31  | 0.49                |

|      |        |     |      |      |        |     |      |
|------|--------|-----|------|------|--------|-----|------|
| 1daa | 2301.1 | 181 | 0.86 | 1mss | 1045.4 | 73  | 0.74 |
| 1dor | 2196.2 | 130 | 0.83 | 1naw | 1192.5 | 16  | 0.33 |
| 1dpg | 2278.7 | 167 | 0.84 | 1np4 | 731.3  | 1   | 0.13 |
| 1dqs | 1604.6 | 87  | 0.78 | 1pbg | 771.0  | 1   | 0.13 |
| 1dxg | 709.8  | 340 | 1.00 | 1pda | 881.2  | 4   | 0.18 |
| 1e98 | 770.4  | 230 | 1.00 | 1ppo | 847.2  | 0   | 0.12 |
| 1ebh | 1781.7 | 115 | 0.82 | 1qaz | 797.8  | 0   | 0.12 |
| 1f13 | 2563.6 | 57  | 0.67 | 1qci | 483.6  | 0   | 0.12 |
| 1fip | 1578.0 | 209 | 0.94 | 1qdm | 767.8  | 0   | 0.12 |
| 1fro | 3575.0 | 96  | 0.80 | 1qha | 1727.2 | 7   | 0.22 |
| 1gvp | 905.1  | 192 | 0.89 | 1qjp | 832.1  | 3   | 0.16 |
| 1hhp | 1596.7 | 281 | 1.00 | 1qme | 1271.9 | 15  | 0.32 |
| 1hjr | 962.0  | 83  | 0.77 | 1qpa | 822.9  | 32  | 0.49 |
| 1hss | 1095.5 | 64  | 0.70 | 1qtq | 715.7  | 11  | 0.27 |
| 1hxp | 3398.7 | 113 | 0.82 | 1rb3 | 614.9  | 0   | 0.12 |
| 1icw | 989.9  | 137 | 0.83 | 1rhs | 595.0  | 0   | 0.12 |
| 1imb | 1648.7 | 185 | 0.87 | 1rne | 1077.3 | 101 | 0.81 |
| 1isa | 919.0  | 180 | 0.86 | 1shk | 893.9  | 1   | 0.13 |
| 1ivy | 1586.2 | 141 | 0.83 | 1the | 1122.0 | 11  | 0.27 |
| 1jhg | 2225.9 | 349 | 1.00 | 1tht | 1049.3 | 134 | 0.83 |
| 1jsg | 789.3  | 146 | 0.83 | 1toa | 1294.4 | 27  | 0.45 |
| 1kba | 599.5  | 0   | 0.12 | 1ton | 712.8  | 21  | 0.39 |
| 1kpf | 1855.0 | 198 | 0.90 | 1urp | 906.7  | 0   | 0.12 |
| 1lyn | 942.1  | 39  | 0.55 | 1vbt | 642.8  | 3   | 0.16 |
| 1m6p | 1017.7 | 99  | 0.80 | 1xgs | 1177.2 | 74  | 0.74 |
| 1mkb | 1598.0 | 124 | 0.82 | 256b | 520.5  | 0   | 0.12 |
| 1mor | 2528.4 | 97  | 0.80 | 256l | 763.1  | 9   | 0.24 |
| 1nox | 2966.1 | 122 | 0.82 | 2acy | 541.4  | 58  | 0.68 |
| 1nse | 2674.6 | 102 | 0.81 | 2atj | 576.0  | 0   | 0.12 |
| 1nsy | 2583.3 | 120 | 0.82 | 2bc2 | 648.1  | 0   | 0.12 |
| 1oac | 7135.2 | 16  | 0.33 | 2bls | 706.0  | 8   | 0.23 |
| 1opy | 1044.8 | 65  | 0.71 | 2erc | 1364.0 | 1   | 0.13 |
| 1pgt | 1228.4 | 157 | 0.84 | 2g3p | 1407.3 | 31  | 0.49 |
| 1pre | 2280.7 | 33  | 0.50 | 2ihl | 708.5  | 47  | 0.61 |
| 1qfh | 2275.0 | 55  | 0.66 | 2mbr | 750.5  | 0   | 0.12 |
| 1qhi | 1698.8 | 103 | 0.81 | 2scp | 1115.1 | 81  | 0.77 |
| 1qr2 | 1917.0 | 130 | 0.83 | 2shp | 591.3  | 0   | 0.12 |
| 1r2f | 1741.9 | 127 | 0.83 | 2tps | 805.7  | 60  | 0.69 |
| 1reg | 676.5  | 0   | 0.12 | 2ugi | 738.4  | 2   | 0.15 |
| 1rfb | 2636.9 | 77  | 0.75 | 3mht | 667.9  | 173 | 0.85 |
| 1rpo | 1398.9 | 182 | 0.86 | 3pmg | 899.1  | 13  | 0.29 |
| 1ses | 2229.6 | 107 | 0.81 | 5tss | 1369.6 | 31  | 0.49 |
| 1slt | 547.2  | 134 | 0.83 | 830c | 1207.8 | 69  | 0.73 |
| 1smn | 868.4  | 164 | 0.84 | 8pti | 688.5  | 7   | 0.22 |
| 1smt | 1969.4 | 278 | 1.00 |      |        |     |      |
| 1sox | 1410.1 | 87  | 0.78 |      |        |     |      |
| 1tc1 | 1505.7 | 92  | 0.79 |      |        |     |      |
| 1tox | 3703.5 | 86  | 0.78 |      |        |     |      |
| 1trk | 4418.3 | 54  | 0.65 |      |        |     |      |
| 1uby | 2162.4 | 135 | 0.83 |      |        |     |      |
| 1utg | 1464.2 | 177 | 0.86 |      |        |     |      |
| 1vfr | 3355.7 | 73  | 0.74 |      |        |     |      |
| 1vok | 1582.6 | 159 | 0.84 |      |        |     |      |

|         |        |       |      |         |       |      |      |
|---------|--------|-------|------|---------|-------|------|------|
| 1wtl    | 686.4  | 96    | 0.80 |         |       |      |      |
| 1xso    | 666.8  | 102   | 0.81 |         |       |      |      |
| 2arc    | 810.3  | 83    | 0.77 |         |       |      |      |
| 2ccy    | 807.3  | 175   | 0.85 |         |       |      |      |
| 2hdh    | 1604.4 | 260   | 1.00 |         |       |      |      |
| 2ilk    | 4479.7 | 43    | 0.58 |         |       |      |      |
| 2lig    | 1581.1 | 47    | 0.61 |         |       |      |      |
| 2mcg    | 1631.8 | 80    | 0.76 |         |       |      |      |
| 2nac    | 3793.4 | 180   | 0.86 |         |       |      |      |
| 2ohx    | 1685.1 | 339   | 1.00 |         |       |      |      |
| 2spc    | 2513.5 | 57    | 0.67 |         |       |      |      |
| 2sqc    | 805.8  | 0     | 0.12 |         |       |      |      |
| 2tct    | 2612.3 | 137   | 0.83 |         |       |      |      |
| 2tgi    | 1260.4 | 145   | 0.83 |         |       |      |      |
| 3dap    | 2653.4 | 154   | 0.84 |         |       |      |      |
| 3sdh    | 879.3  | 104   | 0.81 |         |       |      |      |
| 3ssi    | 838.4  | 115   | 0.82 |         |       |      |      |
| 4kbp    | 1467.9 | 125   | 0.83 |         |       |      |      |
| 5csm    | 2000.1 | 38    | 0.54 |         |       |      |      |
| 5rub    | 2829.1 | 99    | 0.80 |         |       |      |      |
| 8prk    | 968.0  | 239   | 1.00 |         |       |      |      |
| 9wga    | 2298.4 | 151   | 0.83 |         |       |      |      |
| Average | 1923.7 | 129.5 | 0.77 | Average | 863.7 | 25.3 | 0.32 |
| Std Dev | 1097.2 | 82.2  | 0.20 | Std Dev | 294.6 | 42.4 | 0.26 |

<sup>a</sup> Biological homodimers from Baskaran et al. [3]

<sup>b</sup> Monomers (crystallographic dimers) fro Baskaran et al. [4]



**Table S3.** MCC value as function of the threshold  $T^a$

| Threshold T | MCC  |
|-------------|------|
| 20          | 0.64 |
| 21          | 0.64 |
| 22          | 0.66 |
| 23          | 0.66 |
| 24          | 0.66 |
| 25          | 0.66 |
| 26          | 0.67 |
| 27          | 0.66 |
| 28          | 0.67 |
| 29          | 0.67 |
| 30          | 0.67 |
| 31          | 0.68 |
| 32          | 0.72 |
| 33          | 0.73 |
| 34          | 0.72 |
| 35          | 0.72 |
| 36          | 0.72 |
| 37          | 0.72 |
| 38          | 0.72 |
| 39          | 0.71 |
| 40          | 0.69 |
| 41          | 0.69 |
| 42          | 0.69 |
| 43          | 0.69 |
| 44          | 0.68 |
| 45          | 0.68 |
| 46          | 0.68 |
| 47          | 0.67 |
| 48          | 0.67 |
| 49          | 0.67 |
| 50          | 0.67 |
| 51          | 0.67 |
| 52          | 0.67 |
| 53          | 0.67 |
| 54          | 0.67 |
| 55          | 0.66 |
| 56          | 0.65 |
| 57          | 0.65 |
| 58          | 0.63 |
| 59          | 0.64 |
| 60          | 0.64 |

<sup>a</sup> MCC: Matthews correlation coefficient

**Table S4.** Classification of training set dimers by three methods<sup>a, b</sup>

| PDB ID | ClusPro probability of dimer | EPPIC | PISA multimer class | PISA status |
|--------|------------------------------|-------|---------------------|-------------|
| 12as   | 0.84                         | bio   | dimer               | stable      |
| 1a3c   | 0.85                         | bio   | dimer               | stable      |
| 1a4i   | 0.82                         | bio   | dimer               | stable      |
| 1a4u   | 0.89                         | bio   | dimer               | stable      |
| 1aa7   | 0.6                          | bio   | monomer             | stable      |
| 1ad3   | 0.55                         | bio   | dimer               | stable      |
| 1ade   | 0.81                         | bio   | dimer               | stable      |
| 1af5   | 0.12                         | bio   | dimer               | stable      |
| 1afw   | 0.82                         | bio   | dimer               | stable      |
| 1ajs   | 0.74                         | bio   | dimer               | stable      |
| 1vlb   | 0.83                         | bio   | monomer             | stable      |
| 1amk   | 0.93                         | bio   | dimer               | stable      |
| 1aor   | 0.36                         | bio   | dimer               | stable      |
| 1aq6   | 0.86                         | bio   | dimer               | stable      |
| 1auo   | 0.12                         | bio   | dimer               | stable      |
| 1b3a   | 0.91                         | bio   | dimer               | stable      |
| 1b5e   | 0.82                         | bio   | dimer               | stable      |
| 1b67   | 1                            | xtal  | dimer               | stable      |
| 1b8a   | 0.81                         | bio   | dimer               | stable      |
| 1b8j   | 0.79                         | bio   | dimer               | stable      |
| 1bam   | 0.83                         | xtal  | dimer               | uncertain   |
| 1bbh   | 1                            | bio   | dimer               | stable      |
| 1bd0   | 0.8                          | bio   | dimer               | stable      |
| 1bif   | 0.2                          | xtal  | monomer             | stable      |
| 1biq   | 0.8                          | bio   | dimer               | stable      |
| 1bis   | 0.93                         | bio   | dimer               | stable      |
| 1bjw   | 0.73                         | bio   | dimer               | stable      |
| 1bkp   | 0.83                         | bio   | dimer               | stable      |
| 1bmd   | 1                            | bio   | dimer               | stable      |
| 1brw   | 1                            | bio   | dimer               | stable      |
| 1bsl   | 0.84                         | bio   | dimer               | stable      |
| 1bsr   | 1                            | bio   | tetramer            | stable      |
| 1buo   | 0.84                         | bio   | dimer               | stable      |
| 1bxg   | 0.73                         | bio   | dimer               | uncertain   |
| 1bxk   | 0.82                         | bio   | dimer               | stable      |
| 1cdc   | 0.73                         | bio   | dimer               | stable      |
| 1cg2   | 0.74                         | bio   | tetramer            | stable      |
| 1chm   | 0.73                         | bio   | dimer               | stable      |
| 1cmb   | 1                            | bio   | dimer               | stable      |
| 1cnz   | 0.81                         | bio   | dimer               | stable      |
| 1coz   | 0.89                         | bio   | dimer               | stable      |
| 1csh   | 0.69                         | bio   | dimer               | stable      |
| 1ctt   | 0.83                         | bio   | dimer               | stable      |
| 1cvu   | 0.44                         | bio   | trimer              | stable      |
| 1czj   | 0.22                         | bio   | dimer               | stable      |
| 1daa   | 0.86                         | bio   | dimer               | stable      |
| 1dor   | 0.83                         | bio   | dimer               | stable      |

|      |      |      |          |           |
|------|------|------|----------|-----------|
| 1dpg | 0.84 | bio  | dimer    | stable    |
| 1dqs | 0.78 | bio  | dimer    | stable    |
| 1dxg | 1    | bio  | dimer    | stable    |
| 1e98 | 1    | bio  | dimer    | stable    |
| 1ebh | 0.82 | bio  | dimer    | stable    |
| 1f13 | 0.67 | bio  | dimer    | stable    |
| 1fip | 0.94 | bio  | tetramer | stable    |
| 1fro | 0.8  | bio  | dimer    | stable    |
| 1gvp | 0.89 | bio  | dimer    | stable    |
| 1hhp | 1    | bio  | dimer    | stable    |
| 1hjr | 0.77 | bio  | dimer    | stable    |
| 1hss | 0.7  | bio  | dimer    | stable    |
| 1hxp | 0.82 | bio  | dimer    | stable    |
| 1icw | 0.83 | bio  | dimer    | stable    |
| 1imb | 0.87 | xtal | dimer    | stable    |
| 1isa | 0.86 | bio  | dimer    | stable    |
| 1ivy | 0.83 | bio  | dimer    | stable    |
| 1jhg | 1    | bio  | dimer    | stable    |
| 1jsg | 0.83 | bio  | tetramer | stable    |
| 1kba | 0.12 | bio  | dimer    | stable    |
| 1kpf | 0.9  | bio  | dimer    | stable    |
| 1lyn | 0.55 | bio  | dimer    | stable    |
| 1m6p | 0.8  | bio  | dimer    | stable    |
| 1mkb | 0.82 | bio  | dimer    | stable    |
| 1mor | 0.8  | bio  | dimer    | stable    |
| 1nox | 0.82 | bio  | dimer    | stable    |
| 1nse | 0.81 | bio  | dimer    | stable    |
| 1nsy | 0.82 | bio  | dimer    | stable    |
| 1oac | 0.33 | bio  | dimer    | stable    |
| 1opy | 0.71 | xtal | dimer    | stable    |
| 1pgt | 0.84 | bio  | dimer    | stable    |
| 1pre | 0.5  | bio  | dimer    | stable    |
| 1qfh | 0.66 | bio  | dimer    | stable    |
| 1qhi | 0.81 | bio  | dimer    | stable    |
| 1qr2 | 0.83 | bio  | dimer    | stable    |
| 1r2f | 0.83 | bio  | dimer    | stable    |
| 1reg | 0.12 | bio  | dimer    | stable    |
| 1rfb | 0.75 | bio  | dimer    | stable    |
| 1rpo | 0.86 | bio  | dimer    | stable    |
| 1ses | 0.81 | bio  | dimer    | stable    |
| 1slt | 0.83 | xtal | monomer  | stable    |
| 1smn | 0.84 | xtal | dimer    | uncertain |
| 1smt | 1    | bio  | dimer    | stable    |
| 1sox | 0.78 | bio  | dimer    | stable    |
| 1tc1 | 0.79 | bio  | dimer    | stable    |
| 1tox | 0.78 | bio  | dimer    | stable    |
| 1trk | 0.65 | bio  | dimer    | stable    |
| 1uby | 0.83 | bio  | dimer    | stable    |
| 1utg | 0.86 | bio  | dimer    | stable    |
| 1vfr | 0.74 | bio  | dimer    | stable    |
| 1vok | 0.84 | bio  | tetramer | stable    |
| 1wtl | 0.8  | bio  | dimer    | stable    |
| 1xso | 0.81 | bio  | dimer    | stable    |

|      |      |      |          |        |
|------|------|------|----------|--------|
| 2arc | 0.77 | bio  | monomer  | stable |
| 2ccy | 0.85 | bio  | dimer    | stable |
| 2hdh | 1    | bio  | dimer    | stable |
| 2ilk | 0.58 | bio  | dimer    | stable |
| 2lig | 0.61 | bio  | dimer    | stable |
| 2mcg | 0.76 | bio  | dimer    | stable |
| 2nac | 0.86 | bio  | dimer    | stable |
| 2ohx | 1    | xtal | dimer    | stable |
| 2spc | 0.67 | bio  | dimer    | stable |
| 2sqc | 0.12 | xtal | monomer  | stable |
| 2tct | 0.83 | bio  | dimer    | stable |
| 2tgi | 0.83 | bio  | dimer    | stable |
| 3dap | 0.84 | bio  | dimer    | stable |
| 3sdh | 0.81 | bio  | dimer    | stable |
| 3ssi | 0.82 | bio  | dimer    | stable |
| 4kbp | 0.83 | bio  | tetramer | stable |
| 5csm | 0.54 | bio  | dimer    | stable |
| 5rub | 0.8  | bio  | dimer    | stable |
| 8prk | 1    | bio  | dimer    | stable |
| 9wga | 0.83 | bio  | dimer    | stable |

<sup>a</sup> yellow: incorrect classification

<sup>b</sup> biological homodimers from Baskaran et al. [3]

**Table S5.** Classification of training set monomers by three methods<sup>a,b</sup>

| PDB ID | ClusPro<br>Probability<br>of dimer | EPPIC | PISA multimer<br>class | PISA status |
|--------|------------------------------------|-------|------------------------|-------------|
| 13pk   | 0.77                               | xtal  | dimer                  | stable      |
| 1a7v   | 0.29                               | xtal  | monomer                | stable      |
| 1ad5   | 0.24                               | xtal  | dimer                  | uncertain   |
| 1afk   | 0.18                               | xtal  | dimer                  | uncertain   |
| 1ag9   | 0.12                               | xtal  | dimer                  | stable      |
| 1ah7   | 0.39                               | bio   | monomer                | stable      |
| 1ako   | 0.12                               | xtal  | dimer                  | stable      |
| 1amu   | 0.12                               | xtal  | monomer                | stable      |
| 1atl   | 0.12                               | xtal  | monomer                | stable      |
| 1aw7   | 0.19                               | xtal  | monomer                | stable      |
| 1ayl   | 0.33                               | xtal  | monomer                | stable      |
| 1b1j   | 0.86                               | xtal  | monomer                | stable      |
| 1b3j   | 0.81                               | xtal  | dimer                  | uncertain   |
| 1bc2   | 0.12                               | bio   | monomer                | stable      |
| 1bea   | 0.12                               | xtal  | tetramer               | uncertain   |
| 1bin   | 0.12                               | xtal  | dimer                  | uncertain   |
| 1bkz   | 0.83                               | bio   | monomer                | stable      |
| 1bs2   | 0.49                               | xtal  | dimer                  | uncertain   |
| 1byo   | 0.12                               | xtal  | monomer                | stable      |
| 1c02   | 0.71                               | bio   | dimer                  | stable      |
| 1caq   | 0.12                               | bio   | dimer                  | stable      |
| 1ck7   | 0.12                               | xtal  | dimer                  | stable      |
| 1cki   | 0.83                               | xtal  | dimer                  | stable      |
| 1clu   | 0.12                               | xtal  | monomer                | stable      |
| 1cqx   | 0.12                               | bio   | dimer                  | stable      |
| 1dsu   | 0.13                               | xtal  | monomer                | stable      |
| 1dys   | 0.43                               | xtal  | monomer                | stable      |
| 1e0s   | 0.12                               | xtal  | dimer                  | stable      |
| 1ehy   | 0.79                               | bio   | tetramer               | stable      |
| 1epa   | 0.12                               | xtal  | dimer                  | stable      |
| 1ewf   | 0.12                               | xtal  | monomer                | stable      |
| 1feh   | 0.26                               | xtal  | dimer                  | uncertain   |
| 1fgk   | 0.15                               | xtal  | monomer                | stable      |
| 1fjm   | 0.12                               | bio   | monomer                | stable      |
| 1fkd   | 0.12                               | xtal  | tetramer               | stable      |
| 1fmt   | 0.48                               | xtal  | monomer                | stable      |
| 1g2a   | 0.12                               | xtal  | monomer                | stable      |
| 1gar   | 0.12                               | xtal  | dimer                  | stable      |
| 1gjm   | 0.12                               | xtal  | monomer                | stable      |
| 1hf8   | 0.83                               | xtal  | dimer                  | stable      |
| 2j5x   | 0.12                               | xtal  | monomer                | stable      |
| 1ilr   | 0.12                               | xtal  | monomer                | stable      |
| 1kpt   | 0.24                               | xtal  | monomer                | stable      |
| 1kwa   | 0.12                               | bio   | tetramer               | stable      |
| 1mpg   | 0.49                               | xtal  | dimer                  | stable      |
| 1mss   | 0.74                               | bio   | dimer                  | stable      |

|      |      |      |          |           |
|------|------|------|----------|-----------|
| 1naw | 0.33 | bio  | tetramer | stable    |
| 1np4 | 0.13 | xtal | dimer    | uncertain |
| 1pbg | 0.13 | xtal | dimer    | uncertain |
| 1pda | 0.18 | xtal | monomer  | stable    |
| 1ppo | 0.12 | xtal | dimer    | stable    |
| 1qaz | 0.12 | xtal | monomer  | stable    |
| 1qci | 0.12 | xtal | monomer  | stable    |
| 1qdm | 0.12 | xtal | trimer   | uncertain |
| 1qha | 0.22 | bio  | monomer  | stable    |
| 1qjp | 0.16 | bio  | monomer  | stable    |
| 1qme | 0.32 | xtal | monomer  | stable    |
| 1qpa | 0.49 | xtal | dimer    | stable    |
| 1qtq | 0.27 | xtal | dimer    | stable    |
| 1rb3 | 0.12 | xtal | monomer  | stable    |
| 1rhs | 0.12 | xtal | monomer  | stable    |
| 1rne | 0.81 | xtal | dimer    | stable    |
| 1shk | 0.13 | xtal | dimer    | stable    |
| 1the | 0.27 | xtal | dimer    | stable    |
| 1tht | 0.83 | xtal | dimer    | stable    |
| 1toa | 0.45 | bio  | dimer    | stable    |
| 1ton | 0.39 | xtal | dimer    | stable    |
| 1urp | 0.12 | xtal | monomer  | stable    |
| 1vbt | 0.16 | bio  | monomer  | stable    |
| 1xgs | 0.74 | xtal | monomer  | stable    |
| 256b | 0.12 | xtal | monomer  | stable    |
| 256l | 0.24 | xtal | monomer  | stable    |
| 2acy | 0.68 | bio  | monomer  | stable    |
| 2atj | 0.12 | xtal | monomer  | stable    |
| 2bc2 | 0.12 | bio  | dimer    | stable    |
| 2bls | 0.23 | xtal | dimer    | uncertain |
| 2erc | 0.13 | xtal | dimer    | stable    |
| 2g3p | 0.49 | xtal | dimer    | stable    |
| 2ihl | 0.61 | xtal | monomer  | stable    |
| 2mbr | 0.12 | bio  | monomer  | stable    |
| 2scp | 0.77 | bio  | dimer    | uncertain |
| 2shp | 0.12 | xtal | monomer  | stable    |
| 2tps | 0.69 | xtal | monomer  | stable    |
| 2ugi | 0.15 | xtal | dimer    | stable    |
| 3mht | 0.85 | xtal | trimer   | stable    |
| 3pmg | 0.29 | xtal | monomer  | stable    |
| 5tss | 0.49 | xtal | dimer    | uncertain |
| 830c | 0.73 | bio  | tetramer | stable    |
| 8pti | 0.22 | bio  | dimer    | stable    |

<sup>a</sup> yellow: incorrect classification

<sup>b</sup> monomers (crystallographic dimers) from Baskaran et al. [4]

**Table S5.** MCC value as function of the threshold  $T^a$

| Threshold T | MCC  |
|-------------|------|
| 20          | 0.64 |
| 21          | 0.64 |
| 22          | 0.66 |
| 23          | 0.66 |
| 24          | 0.66 |
| 25          | 0.66 |
| 26          | 0.67 |
| 27          | 0.66 |
| 28          | 0.67 |
| 29          | 0.67 |
| 30          | 0.67 |
| 31          | 0.68 |
| 32          | 0.72 |
| 33          | 0.73 |
| 34          | 0.72 |
| 35          | 0.72 |
| 36          | 0.72 |
| 37          | 0.72 |
| 38          | 0.72 |
| 39          | 0.71 |
| 40          | 0.69 |
| 41          | 0.69 |
| 42          | 0.69 |
| 43          | 0.69 |
| 44          | 0.68 |
| 45          | 0.68 |
| 46          | 0.68 |
| 47          | 0.67 |
| 48          | 0.67 |
| 49          | 0.67 |
| 50          | 0.67 |
| 51          | 0.67 |
| 52          | 0.67 |
| 53          | 0.67 |
| 54          | 0.67 |
| 55          | 0.66 |
| 56          | 0.65 |
| 57          | 0.65 |
| 58          | 0.63 |
| 59          | 0.64 |
| 60          | 0.64 |

<sup>a</sup> MCC: Matthews correlation coefficient

**Table S6.** Interface area, number of near-native structures, and inferred probability of being a biological dimer for the proteins in the DC Bio and DC Xtal sets<sup>a</sup>

| Biological dimers |                                  |     |                     | Crystallographic dimers |                                  |     |                     |
|-------------------|----------------------------------|-----|---------------------|-------------------------|----------------------------------|-----|---------------------|
| PDB ID            | Interface area (Å <sup>2</sup> ) | Nnn | Probability (dimer) | PDB ID                  | Interface area (Å <sup>2</sup> ) | Nnn | Probability (dimer) |
| 2fwv              | 2088.9                           | 225 | 1.00                | 1ejd                    | 1215.9                           | 16  | 0.33                |
| 1v2x              | 1684.6                           | 178 | 0.86                | 1gpi                    | 1043.3                           | 51  | 0.64                |
| 1pkh              | 1624.2                           | 93  | 0.79                | 1j96                    | 1217.0                           | 37  | 0.54                |
| 1r5y              | 1551.5                           | 150 | 0.83                | 1lqt                    | 1099.9                           | 0   | 0.12                |
| 1kq3              | 1487.5                           | 129 | 0.83                | 1lxx                    | 1028.7                           | 1   | 0.13                |
| 1jq5              | 1325.9                           | 191 | 0.88                | 1n45                    | 1089.3                           | 11  | 0.27                |
| 2h7i              | 1468.8                           | 99  | 0.80                | 1pp3                    | 1106.8                           | 23  | 0.41                |
| 2nzi              | 1299.0                           | 177 | 0.86                | 1s83                    | 925.1                            | 1   | 0.13                |
| 1uj6              | 1257.5                           | 137 | 0.83                | 1so7                    | 1189.4                           | 15  | 0.32                |
| 1ju3              | 1266.4                           | 49  | 0.62                | 1ueb                    | 1150.0                           | 26  | 0.44                |
| 1sml              | 1253.3                           | 37  | 0.54                | 1w9q                    | 1000.7                           | 57  | 0.67                |
| 3fah              | 1236.5                           | 153 | 0.83                | 1wly                    | 1144.8                           | 57  | 0.67                |
| 1lzl              | 1207.4                           | 219 | 0.99                | 1xgk                    | 1014.5                           | 5   | 0.19                |
| 3iue              | 1106.1                           | 101 | 0.81                | 1ynq                    | 1100.6                           | 5   | 0.19                |
| 1vk5              | 1110.5                           | 69  | 0.73                | 2cki                    | 1203.5                           | 79  | 0.76                |
| 2exb              | 1895.8                           | 41  | 0.57                | 2eyi                    | 1112.3                           | 0   | 0.12                |
| 3a2q              | 1745.5                           | 156 | 0.84                | 2f37                    | 1163.9                           | 0   | 0.12                |
| 1s2z              | 1619.4                           | 170 | 0.85                | 2gas                    | 1561.6                           | 89  | 0.79                |
| 2z1n              | 1578.5                           | 91  | 0.79                | 2hlq                    | 1071.7                           | 21  | 0.39                |
| 2vef              | 1544.2                           | 204 | 0.92                | 2ipi                    | 1330.5                           | 0   | 0.12                |
| 1bs1              | 1455.5                           | 237 | 1.00                | 2j0p                    | 1016.7                           | 189 | 0.88                |
| 3lw6              | 1013.0                           | 200 | 0.91                | 2j46                    | 1152.0                           | 6   | 0.20                |
| 2vr4              | 1278.8                           | 55  | 0.66                | 2ow9                    | 1179.4                           | 65  | 0.71                |
| 1x7v              | 1190.5                           | 220 | 1.00                | 2q7d                    | 1782.7                           | 46  | 0.60                |
| 1f2d              | 1890.4                           | 63  | 0.70                | 2w20                    | 1090.3                           | 0   | 0.12                |
| 1lw4              | 1772.9                           | 87  | 0.78                | 2wbf                    | 1204.3                           | 2   | 0.15                |
| 1n8p              | 1932.3                           | 1   | 0.13                | 2wbq                    | 1521.9                           | 86  | 0.78                |
| 1qop              | 1536.3                           | 85  | 0.78                | 2wsa                    | 1002.4                           | 0   | 0.12                |
| 2aq6              | 1188.1                           | 59  | 0.68                | 2xov                    | 1144.4                           | 0   | 0.12                |
| 2bhs              | 1484.0                           | 96  | 0.80                | 2yz1                    | 1372.0                           | 199 | 0.91                |
| 2cft              | 946.6                            | 92  | 0.79                | 2z6o                    | 1156.5                           | 18  | 0.35                |
| 2e7j              | 1671.2                           | 113 | 0.82                | 3aap                    | 1382.8                           | 139 | 0.83                |
| 2ecq              | 1626.5                           | 68  | 0.72                | 3b37                    | 1150.4                           | 2   | 0.15                |
| 2rkb              | 1104.5                           | 134 | 0.83                | 3c8y                    | 1525.0                           | 13  | 0.29                |
| 1eej              | 856.9                            | 177 | 0.86                | 3cj1                    | 1122.9                           | 37  | 0.54                |
| 1o17              | 932.1                            | 143 | 0.83                | 3cu9                    | 1085.4                           | 2   | 0.15                |
| 3d36              | 1660.8                           | 97  | 0.80                | 3fwk                    | 1044.4                           | 0   | 0.12                |
| 3r0n              | 884.7                            | 82  | 0.77                | 3gkj                    | 992.4                            | 32  | 0.49                |
| 3da8              | 867.3                            | 11  | 0.27                | 3go5                    | 1049.8                           | 0   | 0.12                |
| 2c4w              | 872.9                            | 15  | 0.32                | 3gvo                    | 1208.0                           | 65  | 0.71                |
| 3jrz              | 932.7                            | 232 | 1.00                | 3h30                    | 1310.1                           | 4   | 0.18                |
| 2wxd              | 954.3                            | 82  | 0.77                | 3hzi                    | 1000.0                           | 38  | 0.54                |
| 2d0d              | 1003.5                           | 118 | 0.82                | 3kk8                    | 1287.3                           | 143 | 0.83                |
| 3cm3              | 1014.1                           | 115 | 0.82                | 3m66                    | 1006.6                           | 2   | 0.15                |
| 3o1n              | 1007.0                           | 307 | 1.00                | 3mg1                    | 1095.8                           | 0   | 0.12                |



|         |        |       |      |         |        |      |      |
|---------|--------|-------|------|---------|--------|------|------|
| 3h0n    | 993.9  | 129   | 0.83 | 3mhz    | 1530.8 | 0    | 0.12 |
| 2dvn    | 1045.0 | 249   | 1.00 | 1lf2    | 2139.9 | 109  | 0.81 |
| 3ovp    | 1067.4 | 129   | 0.83 | 2qb5    | 1797.0 | 49   | 0.62 |
| 2i7d    | 1076.0 | 158   | 0.84 | 1zfq    | 1653.2 | 13   | 0.29 |
| 2car    | 1100.5 | 186   | 0.87 | 2yvw    | 1516.4 | 65   | 0.71 |
| 3gus    | 1215.6 | 167   | 0.84 | 1d3h    | 1464.7 | 0    | 0.12 |
| 3jyo    | 1224.2 | 279   | 1.00 | 2e1v    | 1657.8 | 161  | 0.84 |
| 1uz3    | 1196.3 | 105   | 0.81 | 3n5c    | 1455.7 | 147  | 0.83 |
| 2wtm    | 1241.9 | 125   | 0.83 | 2wbm    | 1441.3 | 62   | 0.70 |
| 2a5l    | 1217.2 | 43    | 0.58 | 3c1d    | 1429.8 | 49   | 0.62 |
| 2y39    | 1285.5 | 125   | 0.83 | 1ndb    | 1383.0 | 0    | 0.12 |
| 2ab0    | 1290.6 | 97    | 0.80 | 2x26    | 1369.3 | 158  | 0.84 |
| 3epw    | 1302.4 | 31    | 0.49 | 3kh7    | 1329.5 | 114  | 0.82 |
| 2vvt    | 1328.8 | 16    | 0.33 | 1toa    | 1294.4 | 27   | 0.45 |
| 1p5f    | 1339.3 | 156   | 0.84 | 1ffr    | 1223.4 | 76   | 0.75 |
| 3itf    | 1392.3 | 80    | 0.76 | 1vqq    | 1173.4 | 2    | 0.15 |
| 3kd2    | 1365.8 | 149   | 0.83 | 1n4g    | 1161.5 | 101  | 0.81 |
| 2y27    | 1355.8 | 154   | 0.84 | 3ita    | 1139.6 | 13   | 0.29 |
|         |        |       |      | 1woq    | 1130.0 | 120  | 0.82 |
|         |        |       |      | 1cqx    | 1109.5 | 0    | 0.12 |
|         |        |       |      | 2eqa    | 1106.3 | 17   | 0.34 |
|         |        |       |      | 3mhj    | 1098.5 | 8    | 0.23 |
|         |        |       |      | 2fgz    | 1092.2 | 1    | 0.13 |
|         |        |       |      | 1fpo    | 1080.0 | 0    | 0.12 |
|         |        |       |      | 3lvd    | 996.1  | 46   | 0.60 |
|         |        |       |      | 3irb    | 1075.3 | 64   | 0.70 |
|         |        |       |      | 1utj    | 986.3  | 0    | 0.12 |
|         |        |       |      | 3f0o    | 1040.1 | 9    | 0.24 |
|         |        |       |      | 2h44    | 1041.1 | 312  | 1.00 |
|         |        |       |      | 1t8g    | 1026.1 | 0    | 0.12 |
|         |        |       |      | 1g6a    | 1021.4 | 9    | 0.24 |
|         |        |       |      | 2zyr    | 1010.6 | 32   | 0.49 |
|         |        |       |      | 3els    | 949.9  | 15   | 0.32 |
| Average | 1309.0 | 126.0 | 0.78 | Average | 1212.5 | 43.1 | 0.42 |
| Std Dev | 293.8  | 68.0  | 0.18 | Std Dev | 225.4  | 58.8 | 0.28 |

<sup>a</sup> DC Bio and DC Xtal sets from Duarte et al. [5]

**Table S7.** Classification of DC Bio set by three methods<sup>a, b</sup>

| PDB ID | ClusPro probability of dimer | EPPIC | PISA multimer class | PISA status |
|--------|------------------------------|-------|---------------------|-------------|
| 2fwv   | 1.00                         | bio   | tetramer            | stable      |
| 1v2x   | 0.86                         | bio   | dimer               | stable      |
| 1pkh   | 0.79                         | bio   | hexamer             | stable      |
| 1r5y   | 0.83                         | bio   | dimer               | stable      |
| 1kq3   | 0.83                         | bio   | octomer             | stable      |
| 1jq5   | 0.88                         | bio   | octomer             | stable      |
| 2h7i   | 0.80                         | bio   | tetramer            | stable      |
| 2nzl   | 0.86                         | bio   | tetramer            | stable      |
| 1uj6   | 0.83                         | bio   | dimer               | stable      |
| 1ju3   | 0.62                         | xtal  | dimer               | stable      |
| 1sml   | 0.54                         | bio   | tetramer            | stable      |
| 3fah   | 0.83                         | bio   | dimer               | stable      |
| 1lzl   | 0.99                         | bio   | dimer               | stable      |
| 3iue   | 0.81                         | bio   | monomer             | stable      |
| 1vk5   | 0.73                         | bio   | dimer               | stable      |
| 2exb   | 0.57                         | bio   | dimer               | stable      |
| 3a2q   | 0.84                         | bio   | dimer               | stable      |
| 1s2z   | 0.85                         | bio   | tetramer            | stable      |
| 2z1n   | 0.79                         | bio   | tetramer            | stable      |
| 2vef   | 0.92                         | bio   | dimer               | stable      |
| 1bs1   | 1.00                         | bio   | dimer               | stable      |
| 3lw6   | 0.91                         | bio   | monomer             | stable      |
| 2vr4   | 0.66                         | bio   | dimer               | uncertain   |
| 1x7v   | 1.00                         | bio   | hexamer             | stable      |
| 1f2d   | 0.70                         | bio   | dimer               | stable      |
| 1lw4   | 0.78                         | bio   | tetramer            | stable      |
| 1n8p   | 0.13                         | bio   | tetramer            | stable      |
| 1qop   | 0.78                         | bio   | tetramer            | stable      |
| 2aq6   | 0.68                         | bio   | dimer               | stable      |
| 2bhs   | 0.80                         | bio   | dimer               | stable      |
| 2cft   | 0.79                         | bio   | dimer               | stable      |
| 2e7j   | 0.82                         | bio   | dimer               | stable      |
| 2ecq   | 0.72                         | xtal  | dimer               | stable      |
| 2rkb   | 0.83                         | bio   | dimer               | stable      |
| 1eej   | 0.86                         | bio   | dimer               | stable      |
| 1o17   | 0.83                         | xtal  | dimer               | stable      |
| 3d36   | 0.80                         | bio   | hexamer             | stable      |
| 3r0n   | 0.77                         | bio   | dimer               | stable      |
| 3da8   | 0.27                         | bio   | dimer               | stable      |
| 2c4w   | 0.32                         | bio   | dodecamer           | stable      |
| 3jrz   | 1.00                         | bio   | dimer               | stable      |
| 2wxd   | 0.77                         | bio   | dimer               | stable      |
| 2d0d   | 0.82                         | bio   | dimer               | uncertain   |
| 3cm3   | 0.82                         | bio   | dimer               | stable      |
| 3o1n   | 1.00                         | bio   | dimer               | stable      |
| 3h0n   | 0.83                         | bio   | dimer               | stable      |
| 2dvn   | 1.00                         | bio   | tetramer            | stable      |

|      |      |      |          |        |
|------|------|------|----------|--------|
| 3ovp | 0.83 | bio  | dimer    | stable |
| 2i7d | 0.84 | bio  | dimer    | stable |
| 2car | 0.87 | bio  | dimer    | stable |
| 3gus | 0.84 | bio  | dimer    | stable |
| 3jyo | 1.00 | bio  | dimer    | stable |
| 1uz3 | 0.81 | bio  | dimer    | stable |
| 2wtm | 0.83 | xtal | dimer    | stable |
| 2a5l | 0.58 | bio  | tetramer | stable |
| 2y39 | 0.83 | bio  | dimer    | stable |
| 2ab0 | 0.80 | bio  | dimer    | stable |
| 3epw | 0.49 | bio  | dimer    | stable |
| 2vvt | 0.33 | bio  | dimer    | stable |
| 1p5f | 0.84 | bio  | dimer    | stable |
| 3itf | 0.76 | bio  | dimer    | stable |
| 3kd2 | 0.83 | bio  | dimer    | stable |
| 2y27 | 0.84 | bio  | dimer    | stable |

<sup>a</sup> yellow: incorrect classification

<sup>a</sup> DC Bio and DC Xtal sets from Duarte et al. [5]

**Table S8.** Classification of DC Xtal set by three methods<sup>a,b</sup>

| PDB ID | ClusPro<br>probability of<br>dimer | EPPIC | PISA<br>multimer<br>class | PISA status |
|--------|------------------------------------|-------|---------------------------|-------------|
| 1ejd   | 0.33                               | bio   | tetramer                  | stable      |
| 1gpi   | 0.64                               | xtal  | monomer                   | stable      |
| 1j96   | 0.54                               | xtal  | monomer                   | stable      |
| 1lqt   | 0.12                               | xtal  | monomer                   | stable      |
| 1lxx   | 0.13                               | xtal  | monomer                   | stable      |
| 1n45   | 0.27                               | xtal  | monomer                   | stable      |
| 1pp3   | 0.41                               | xtal  | monomer                   | stable      |
| 1s83   | 0.13                               | xtal  | monomer                   | stable      |
| 1so7   | 0.32                               | xtal  | monomer                   | stable      |
| 1ueb   | 0.44                               | xtal  | dimer                     | stable      |
| 1w9q   | 0.67                               | bio   | trimer                    | stable      |
| 1wly   | 0.67                               | bio   | dimer                     | stable      |
| 1xgk   | 0.19                               | bio   | dimer                     | stable      |
| 1ynq   | 0.19                               | xtal  | dimer                     | stable      |
| 2cki   | 0.76                               | xtal  | dimer                     | stable      |
| 2eyi   | 0.12                               | xtal  | monomer                   | stable      |
| 2f37   | 0.12                               | xtal  | monomer                   | stable      |
| 2gas   | 0.79                               | xtal  | dimer                     | stable      |
| 2hlq   | 0.39                               | xtal  | monomer                   | stable      |
| 2ipi   | 0.12                               | bio   | monomer                   | stable      |
| 2j0p   | 0.88                               | bio   | monomer                   | stable      |
| 2j46   | 0.20                               | xtal  | monomer                   | stable      |
| 2ow9   | 0.71                               | bio   | tetramer                  | stable      |
| 2q7d   | 0.60                               | xtal  | dimer                     | stable      |
| 2w20   | 0.12                               | xtal  | monomer                   | stable      |
| 2wbf   | 0.15                               | xtal  | monomer                   | stable      |
| 2wbq   | 0.78                               | bio   | dimer                     | stable      |
| 2wsa   | 0.12                               | xtal  | monomer                   | stable      |
| 2xov   | 0.12                               | bio   | monomer                   | stable      |
| 2yz1   | 0.91                               | bio   | dimer                     | stable      |
| 2z6o   | 0.35                               | xtal  | monomer                   | stable      |
| 3aap   | 0.83                               | bio   | monomer                   | stable      |
| 3b37   | 0.15                               | xtal  | monomer                   | stable      |
| 3c8y   | 0.29                               | xtal  | monomer                   | stable      |
| 3cj1   | 0.54                               | xtal  | monomer                   | stable      |
| 3cu9   | 0.15                               | xtal  | dimer                     | stable      |
| 3fwk   | 0.12                               | xtal  | monomer                   | stable      |
| 3gkj   | 0.49                               | bio   | monomer                   | stable      |
| 3go5   | 0.12                               | xtal  | monomer                   | stable      |
| 3gvo   | 0.71                               | bio   | monomer                   | stable      |
| 3h30   | 0.18                               | xtal  | dimer                     | stable      |
| 3hzi   | 0.54                               | bio   | dimer                     | uncertain   |
| 3kk8   | 0.83                               | xtal  | monomer                   | stable      |
| 3m66   | 0.15                               | xtal  | monomer                   | stable      |
| 3mg1   | 0.12                               | xtal  | monomer                   | stable      |
| 3mhz   | 0.12                               | xtal  | monomer                   | stable      |
| 1lf2   | 0.81                               | xtal  | tetramer                  | stable      |
| 2qb5   | 0.62                               | xtal  | monomer                   | stable      |

|      |      |      |          |        |
|------|------|------|----------|--------|
| 1zlq | 0.29 | xtal | dimer    | stable |
| 2yvw | 0.71 | bio  | dimer    | stable |
| 1d3h | 0.12 | xtal | monomer  | stable |
| 2e1v | 0.84 | xtal | dimer    | stable |
| 3n5c | 0.83 | bio  | dimer    | stable |
| 2wbm | 0.70 | bio  | tetramer | stable |
| 3c1d | 0.62 | xtal | dimer    | stable |
| 1ndb | 0.12 | xtal | monomer  | stable |
| 2x26 | 0.84 | xtal | monomer  | stable |
| 3kh7 | 0.82 | bio  | dimer    | stable |
| 1toa | 0.45 | bio  | dimer    | stable |
| 1ffr | 0.75 | bio  | monomer  | stable |
| 1vqq | 0.15 | xtal | dimer    | stable |
| 1n4g | 0.81 | bio  | dimer    | stable |
| 3ita | 0.29 | xtal | dimer    | stable |
| 1woq | 0.82 | bio  | dimer    | stable |
| 1cqx | 0.12 | bio  | dimer    | stable |
| 2eqa | 0.34 | bio  | monomer  | stable |
| 3mhj | 0.23 | xtal | monomer  | stable |
| 2fgz | 0.13 | xtal | monomer  | stable |
| 1fpo | 0.12 | bio  | trimer   | stable |
| 3lvd | 0.60 | xtal | monomer  | stable |
| 3irb | 0.70 | xtal | tetramer | stable |
| 1utj | 0.12 | xtal | monomer  | stable |
| 3f0o | 0.24 | bio  | dimer    | stable |
| 2h44 | 1.00 | xtal | dimer    | stable |
| 1t8g | 0.12 | xtal | octomer  | stable |
| 1g6a | 0.24 | bio  | dimer    | stable |
| 2zyr | 0.49 | xtal | monomer  | stable |
| 3els | 0.32 | xtal | hexamer  | stable |

<sup>a</sup> yellow: incorrect classification

<sup>a</sup> DC Bio and DC Xtal sets from Duarte et al. [5]

**Table S9.** Interface area, number of near-native structures, and inferred probability of being a biological dimer for the proteins in the test set<sup>a</sup>

| Biological dimers |                                  |     |                     | Crystallographic dimers |                                  |     |                     |
|-------------------|----------------------------------|-----|---------------------|-------------------------|----------------------------------|-----|---------------------|
| PDB ID            | Interface area (Å <sup>2</sup> ) | Nnn | Probability (dimer) | PDB ID                  | Interface area (Å <sup>2</sup> ) | Nnn | Probability (dimer) |
| 3w66              | 529.6                            | 0   | 0.12                | 3w6r                    | 859.9                            | 54  | 0.65                |
| 3w8g              | 760.8                            | 183 | 0.87                | 3w94                    | 750.3                            | 0   | 0.12                |
| 3we1              | 529.3                            | 1   | 0.13                | 3w9g                    | 604.3                            | 8   | 0.23                |
| 3wfi              | 1028.6                           | 316 | 1.00                | 3wbi                    | 1467.0                           | 0   | 0.12                |
| 3wjk              | 1722.6                           | 192 | 0.89                | 3wbj                    | 1195.5                           | 59  | 0.68                |
| 3wkw              | 2891.9                           | 81  | 0.77                | 3wdf                    | 546.3                            | 42  | 0.58                |
| 3wmd              | 1081.4                           | 47  | 0.61                | 3wea                    | 445.6                            | 0   | 0.12                |
| 3wo8              | 2446.6                           | 104 | 0.81                | 3who                    | 567.0                            | 1   | 0.13                |
| 3wpx              | 992.8                            | 181 | 0.86                | 3wj9                    | 588.6                            | 0   | 0.12                |
| 3wsc              | 1566.2                           | 1   | 0.13                | 3wo9                    | 710.6                            | 0   | 0.12                |
| 3wtz              | 690.6                            | 74  | 0.74                | 3wob                    | 460.8                            | 1   | 0.13                |
| 3wu0              | 687.0                            | 88  | 0.78                | 3wp3                    | 644.0                            | 0   | 0.12                |
| 3wva              | 1517.9                           | 140 | 0.83                | 3wp9                    | 716.5                            | 23  | 0.41                |
| 3wvb              | 1521.0                           | 155 | 0.84                | 3wpj                    | 566.9                            | 0   | 0.12                |
| 3wvo              | 1540.6                           | 78  | 0.76                | 3wpy                    | 1100.1                           | 5   | 0.19                |
| 3wvz              | 2607.7                           | 82  | 0.77                | 3wpz                    | 1118.5                           | 25  | 0.43                |
| 3wx4              | 1220.4                           | 159 | 0.84                | 3wrt                    | 490.3                            | 0   | 0.12                |
| 3wxi              | 1416.9                           | 148 | 0.83                | 3wuq                    | 798.5                            | 0   | 0.12                |
| 3wy7              | 2592.5                           | 114 | 0.82                | 3wuy                    | 872.8                            | 0   | 0.12                |
| 3wyb              | 3216.7                           | 96  | 0.80                | 3wv4                    | 514.6                            | 0   | 0.12                |
| 3wyd              | 542.7                            | 68  | 0.72                | 3wvf                    | 451.6                            | 0   | 0.12                |
| 3wzg              | 1066.5                           | 164 | 0.84                | 3wvt                    | 589.1                            | 0   | 0.12                |
| 4bhy              | 1988.9                           | 37  | 0.54                | 3wx5                    | 403.3                            | 0   | 0.12                |
| 4c7v              | 3998.0                           | 78  | 0.76                | 3wzt                    | 718.4                            | 13  | 0.29                |
| 4c88              | 1107.9                           | 94  | 0.79                | 3x0w                    | 595.8                            | 0   | 0.12                |
| 4cbv              | 1777.7                           | 54  | 0.65                | 3zfm                    | 333.2                            | 0   | 0.12                |
| 4chk              | 743.5                            | 49  | 0.62                | 3zfy                    | 404.9                            | 0   | 0.12                |
| 4cij              | 1458.2                           | 37  | 0.54                | 3zk0                    | 589.7                            | 7   | 0.22                |
| 4ckk              | 1761.7                           | 55  | 0.66                | 3zlh                    | 1825.2                           | 97  | 0.80                |
| 4ckn              | 1371.7                           | 82  | 0.77                | 3zm0                    | 334.0                            | 0   | 0.12                |
| 4cmz              | 3689.9                           | 220 | 1.00                | 3zm1                    | 314.0                            | 0   | 0.12                |
| 4cop              | 489.0                            | 131 | 0.83                | 3zm2                    | 324.7                            | 0   | 0.12                |
| 4cti              | 2596.6                           | 62  | 0.70                | 3zm3                    | 381.8                            | 0   | 0.12                |
| 4cu5              | 706.1                            | 481 | 1.00                | 3zny                    | 564.5                            | 0   | 0.12                |
| 4cw9              | 635.1                            | 0   | 0.12                | 3zq3                    | 748.1                            | 10  | 0.26                |
| 4cwc              | 1505.3                           | 52  | 0.64                | 4bg0                    | 892.2                            | 0   | 0.12                |
| 4cwe              | 1378.3                           | 30  | 0.48                | 4bob                    | 354.0                            | 0   | 0.12                |
| 4cxj              | 2001.5                           | 137 | 0.83                | 4bod                    | 453.0                            | 0   | 0.12                |
| 4d28              | 1404.9                           | 34  | 0.51                | 4bp8                    | 1075.0                           | 51  | 0.64                |
| 4d5s              | 758.2                            | 142 | 0.83                | 4bpf                    | 580.6                            | 2   | 0.15                |
| 4d6k              | 2270.1                           | 227 | 1.00                | 4bpy                    | 426.5                            | 0   | 0.12                |
| 4fb8              | 2682.2                           | 108 | 0.81                | 4bxm                    | 584.7                            | 0   | 0.12                |
| 4ihe              | 1746.5                           | 118 | 0.82                | 4c41                    | 620.9                            | 0   | 0.12                |
| 4j0e              | 1685.2                           | 213 | 0.96                | 4c5f                    | 599.5                            | 0   | 0.12                |
| 4j0f              | 1644.4                           | 216 | 0.97                | 4c6r                    | 710.5                            | 11  | 0.27                |
| 4j7a              | 1116.5                           | 110 | 0.82                | 4cbe                    | 896.0                            | 0   | 0.12                |

|      |        |     |      |      |        |     |      |
|------|--------|-----|------|------|--------|-----|------|
| 4j7r | 1911.8 | 232 | 1.00 | 4cbh | 1171.6 | 0   | 0.12 |
| 4jgm | 698.2  | 0   | 0.12 | 4cbi | 1177.1 | 0   | 0.12 |
| 4jp2 | 1483.3 | 29  | 0.47 | 4cbl | 1332.7 | 6   | 0.20 |
| 4ju5 | 1810.7 | 214 | 0.97 | 4cbm | 1180.1 | 0   | 0.12 |
| 4jup | 389.5  | 20  | 0.38 | 4cdo | 458.8  | 20  | 0.38 |
| 4k2e | 1349.0 | 163 | 0.84 | 4cfi | 628.2  | 0   | 0.12 |
| 4kde | 1615.9 | 281 | 1.00 | 4ch7 | 579.2  | 0   | 0.12 |
| 4ke2 | 1787.5 | 4   | 0.18 | 4chj | 930.5  | 144 | 0.83 |
| 4km3 | 1157.9 | 125 | 0.83 | 4cil | 783.5  | 2   | 0.15 |
| 4kn8 | 1201.8 | 255 | 1.00 | 4co7 | 515.3  | 0   | 0.12 |
| 4kp2 | 1756.8 | 41  | 0.57 | 4cso | 1146.4 | 5   | 0.19 |
| 4kz1 | 695.3  | 104 | 0.81 | 4cx8 | 746.1  | 0   | 0.12 |
| 4l2w | 1072.2 | 47  | 0.61 | 4cxi | 2001.1 | 145 | 0.83 |
| 4l4q | 2598.3 | 74  | 0.74 | 4cye | 684.5  | 148 | 0.83 |
| 4l69 | 1287.4 | 132 | 0.83 | 4d2o | 1026.0 | 0   | 0.12 |
| 4l9e | 1306.0 | 391 | 1.00 | 4d4q | 533.7  | 0   | 0.12 |
| 4le5 | 2448.8 | 46  | 0.60 | 4d5r | 790.3  | 109 | 0.81 |
| 4lft | 517.9  | 0   | 0.12 | 4d70 | 445.7  | 0   | 0.12 |
| 4ljk | 791.5  | 194 | 0.89 | 4d7r | 523.9  | 0   | 0.12 |
| 4ljl | 710.3  | 213 | 0.96 | 4h9w | 438.6  | 2   | 0.15 |
| 4lpu | 2061.2 | 98  | 0.80 | 4hic | 542.7  | 0   | 0.12 |
| 4lpw | 1916.8 | 74  | 0.74 | 4icu | 545.8  | 0   | 0.12 |
| 4lpx | 2109.4 | 50  | 0.63 | 4ino | 904.8  | 0   | 0.12 |
| 4ltb | 5267.9 | 18  | 0.35 | 4iqc | 581.3  | 1   | 0.13 |
| 4luy | 3263.7 | 115 | 0.82 | 4irf | 674.0  | 22  | 0.40 |
| 4lwo | 1645.7 | 102 | 0.81 | 4it7 | 466.5  | 0   | 0.12 |
| 4m0d | 4320.9 | 55  | 0.66 | 4iyc | 773.1  | 0   | 0.12 |
| 4m0q | 1449.4 | 83  | 0.77 | 4ize | 764.7  | 13  | 0.29 |
| 4m23 | 1547.5 | 86  | 0.78 | 4izl | 772.1  | 0   | 0.12 |
| 4m36 | 3405.2 | 47  | 0.61 | 4j0o | 798.6  | 0   | 0.12 |
| 4m6a | 2105.6 | 117 | 0.82 | 4j1s | 602.8  | 3   | 0.16 |
| 4m8z | 965.3  | 103 | 0.81 | 4j2r | 620.9  | 0   | 0.12 |
| 4mac | 488.9  | 106 | 0.81 | 4jkq | 787.4  | 0   | 0.12 |
| 4mdu | 943.7  | 5   | 0.19 | 4jmp | 454.7  | 0   | 0.12 |
| 4mea | 1505.2 | 351 | 1.00 | 4k1s | 473.8  | 0   | 0.12 |
| 4mei | 682.9  | 14  | 0.31 | 4k40 | 692.2  | 0   | 0.12 |
| 4mfu | 963.5  | 0   | 0.12 | 4k51 | 874.1  | 0   | 0.12 |
| 4mfv | 896.3  | 0   | 0.12 | 4k5q | 626.7  | 0   | 0.12 |
| 4mid | 1266.1 | 192 | 0.89 | 4k82 | 729.0  | 0   | 0.12 |
| 4mir | 1560.6 | 187 | 0.87 | 4k83 | 565.0  | 39  | 0.55 |
| 4mis | 1493.7 | 206 | 0.93 | 4k9s | 727.3  | 0   | 0.12 |
| 4ml3 | 811.0  | 52  | 0.64 | 4kex | 449.1  | 0   | 0.12 |
| 4mld | 758.2  | 57  | 0.67 | 4kxo | 1758.6 | 186 | 0.87 |
| 4mmn | 831.4  | 311 | 1.00 | 4l1d | 447.5  | 25  | 0.43 |
| 4mpl | 1249.3 | 144 | 0.83 | 4l6u | 635.4  | 0   | 0.12 |
| 4mt8 | 2024.5 | 47  | 0.61 | 4l8i | 827.8  | 0   | 0.12 |
| 4mtx | 2122.5 | 44  | 0.59 | 4l8l | 871.1  | 141 | 0.83 |
| 4muo | 1129.0 | 109 | 0.81 | 4l9h | 1109.1 | 85  | 0.78 |
| 4mxm | 1122.6 | 130 | 0.83 | 4lcm | 814.0  | 0   | 0.12 |
| 4myc | 6853.3 | 10  | 0.26 | 4lee | 564.5  | 0   | 0.12 |
| 4myz | 1566.4 | 402 | 1.00 | 4lhf | 1034.8 | 148 | 0.83 |
| 4mzm | 1257.7 | 246 | 1.00 | 4lk4 | 595.0  | 9   | 0.24 |
| 4mzp | 1277.0 | 219 | 0.99 | 4lpt | 788.0  | 40  | 0.56 |

|      |        |     |      |      |        |     |      |
|------|--------|-----|------|------|--------|-----|------|
| 4mzt | 1239.1 | 182 | 0.86 | 4lrk | 1351.9 | 126 | 0.83 |
| 4n06 | 1254.8 | 56  | 0.66 | 4lso | 524.0  | 0   | 0.12 |
| 4n1k | 871.5  | 22  | 0.40 | 4lth | 406.7  | 0   | 0.12 |
| 4n1y | 1624.5 | 185 | 0.87 | 4lw5 | 681.9  | 1   | 0.13 |
| 4n92 | 584.4  | 0   | 0.12 | 4lzi | 660.2  | 64  | 0.70 |
| 4n9h | 1857.9 | 155 | 0.84 | 4m64 | 828.6  | 0   | 0.12 |
| 4na2 | 2607.9 | 78  | 0.76 | 4m7g | 499.9  | 0   | 0.12 |
| 4ncd | 855.9  | 151 | 0.83 | 4m80 | 602.7  | 0   | 0.12 |
| 4ndj | 2363.8 | 70  | 0.73 | 4m8g | 577.1  | 20  | 0.38 |
| 4ndk | 1414.9 | 151 | 0.83 | 4m90 | 630.5  | 0   | 0.12 |
| 4ndw | 2010.2 | 199 | 0.91 | 4m9p | 903.2  | 17  | 0.34 |
| 4nj0 | 882.7  | 229 | 1.00 | 4mc0 | 641.1  | 0   | 0.12 |
| 4nj1 | 924.9  | 217 | 0.98 | 4mck | 1005.3 | 26  | 0.44 |
| 4nk7 | 785.6  | 45  | 0.60 | 4mee | 423.1  | 0   | 0.12 |
| 4nkk | 1467.8 | 331 | 1.00 | 4mel | 1516.8 | 187 | 0.87 |
| 4nn1 | 3044.8 | 243 | 1.00 | 4mem | 992.7  | 24  | 0.42 |
| 4nom | 813.5  | 0   | 0.12 | 4mfi | 957.9  | 20  | 0.38 |
| 4npu | 1565.1 | 382 | 1.00 | 4mfj | 742.9  | 1   | 0.13 |
| 4nqf | 1203.6 | 32  | 0.49 | 4mgf | 1031.0 | 27  | 0.45 |
| 4nqt | 1286.7 | 67  | 0.72 | 4mgs | 415.5  | 0   | 0.12 |
| 4nsr | 1126.8 | 138 | 0.83 | 4mhp | 712.7  | 0   | 0.12 |
| 4nsw | 5938.3 | 14  | 0.31 | 4mhr | 1037.8 | 260 | 1.00 |
| 4ny0 | 735.5  | 0   | 0.12 | 4mq3 | 525.1  | 0   | 0.12 |
| 4o0q | 1498.6 | 237 | 1.00 | 4mt5 | 743.5  | 9   | 0.24 |
| 4o1h | 731.2  | 319 | 1.00 | 4mt6 | 713.4  | 0   | 0.12 |
| 4o2h | 919.3  | 20  | 0.38 | 4mt7 | 458.5  | 0   | 0.12 |
| 4o60 | 1437.3 | 1   | 0.13 | 4mzd | 399.1  | 0   | 0.12 |
| 4o8b | 1438.0 | 274 | 1.00 | 4n08 | 683.6  | 0   | 0.12 |
| 4oaf | 1130.5 | 28  | 0.46 | 4n1l | 691.4  | 9   | 0.24 |
| 4oft | 1298.0 | 255 | 1.00 | 4n3x | 940.2  | 122 | 0.82 |
| 4ogd | 2516.7 | 71  | 0.73 | 4n40 | 654.7  | 0   | 0.12 |
| 4ogf | 1330.1 | 149 | 0.83 | 4n4a | 1357.1 | 5   | 0.19 |
| 4oh9 | 1447.5 | 132 | 0.83 | 4n5a | 856.9  | 0   | 0.12 |
| 4oi3 | 1069.6 | 416 | 1.00 | 4n5c | 944.0  | 0   | 0.12 |
| 4okc | 2395.3 | 129 | 0.83 | 4n5q | 877.0  | 2   | 0.15 |
| 4oky | 811.4  | 26  | 0.44 | 4n6l | 796.5  | 6   | 0.20 |
| 4om7 | 671.5  | 32  | 0.49 | 4n6t | 555.7  | 0   | 0.12 |
| 4omt | 1234.1 | 12  | 0.28 | 4n6u | 591.8  | 0   | 0.12 |
| 4ooi | 1425.5 | 219 | 0.99 | 4n75 | 486.6  | 0   | 0.12 |
| 4or8 | 3048.9 | 108 | 0.81 | 4n7f | 626.1  | 142 | 0.83 |
| 4otm | 2117.8 | 137 | 0.83 | 4n8h | 1844.3 | 36  | 0.53 |
| 4oun | 1301.0 | 168 | 0.85 | 4n8k | 1885.0 | 42  | 0.58 |
| 4p08 | 1192.2 | 39  | 0.55 | 4n8l | 1813.1 | 30  | 0.48 |
| 4p12 | 1514.5 | 37  | 0.54 | 4nbo | 626.7  | 36  | 0.53 |
| 4p22 | 2447.4 | 55  | 0.66 | 4nc9 | 920.1  | 25  | 0.43 |
| 4p61 | 1613.3 | 276 | 1.00 | 4nci | 594.3  | 53  | 0.65 |
| 4p6k | 544.4  | 8   | 0.23 | 4ndl | 376.7  | 0   | 0.12 |
| 4p6l | 535.0  | 1   | 0.13 | 4nfb | 772.8  | 0   | 0.12 |
| 4p96 | 1702.6 | 97  | 0.80 | 4nfc | 641.8  | 33  | 0.50 |
| 4p9f | 1175.1 | 105 | 0.81 | 4nfx | 1640.6 | 226 | 1.00 |
| 4pd0 | 3058.9 | 40  | 0.56 | 4ng0 | 407.9  | 382 | 1.00 |
| 4pdp | 738.4  | 0   | 0.12 | 4nj6 | 657.2  | 57  | 0.67 |
| 4pgg | 4733.5 | 121 | 0.82 | 4nj7 | 462.7  | 0   | 0.12 |



|      |        |     |      |      |        |     |      |
|------|--------|-----|------|------|--------|-----|------|
| 4ph6 | 990.4  | 145 | 0.83 | 4nj8 | 364.8  | 0   | 0.12 |
| 4pmu | 955.2  | 117 | 0.82 | 4njc | 726.7  | 368 | 1.00 |
| 4pn0 | 2112.5 | 172 | 0.85 | 4nk6 | 807.5  | 17  | 0.34 |
| 4pon | 1508.6 | 226 | 1.00 | 4nk8 | 803.6  | 84  | 0.77 |
| 4prs | 1471.2 | 120 | 0.82 | 4nl7 | 1254.8 | 0   | 0.12 |
| 4pu7 | 1034.3 | 282 | 1.00 | 4nlb | 611.1  | 0   | 0.12 |
| 4pu8 | 1047.0 | 229 | 1.00 | 4nng | 613.8  | 0   | 0.12 |
| 4puh | 705.7  | 327 | 1.00 | 4nnh | 602.0  | 11  | 0.27 |
| 4pus | 653.0  | 0   | 0.12 | 4nnk | 673.3  | 0   | 0.12 |
| 4pvc | 1038.6 | 97  | 0.80 | 4noj | 473.9  | 0   | 0.12 |
| 4pz9 | 792.6  | 15  | 0.32 | 4npf | 1404.4 | 182 | 0.86 |
| 4pzc | 1882.4 | 201 | 0.91 | 4nq0 | 624.3  | 0   | 0.12 |
| 4q0c | 4048.2 | 69  | 0.73 | 4nsp | 695.8  | 0   | 0.12 |
| 4q20 | 1582.8 | 106 | 0.81 | 4nu2 | 651.3  | 0   | 0.12 |
| 4q25 | 1306.1 | 54  | 0.65 | 4nv8 | 837.6  | 73  | 0.74 |
| 4q2o | 1481.0 | 282 | 1.00 | 4nx9 | 1116.7 | 58  | 0.68 |
| 4q2q | 1345.1 | 420 | 1.00 | 4nzz | 497.2  | 0   | 0.12 |
| 4q75 | 3807.5 | 100 | 0.80 | 4o2x | 524.9  | 15  | 0.32 |
| 4q76 | 3645.9 | 100 | 0.80 | 4o3x | 376.2  | 0   | 0.12 |
| 4q97 | 977.5  | 26  | 0.44 | 4o4c | 814.6  | 23  | 0.41 |
| 4q9b | 727.8  | 140 | 0.83 | 4o5p | 352.7  | 0   | 0.12 |
| 4qfb | 656.8  | 0   | 0.12 | 4o5s | 382.7  | 0   | 0.12 |
| 4qhr | 2359.5 | 137 | 0.83 | 4o6g | 579.5  | 1   | 0.13 |
| 4qjn | 1902.4 | 166 | 0.84 | 4o6k | 880.3  | 6   | 0.20 |
| 4ql6 | 1293.0 | 0   | 0.12 | 4o6x | 616.0  | 151 | 0.83 |
| 4qr0 | 1428.3 | 229 | 1.00 | 4o7q | 357.0  | 0   | 0.12 |
| 4qr1 | 1396.3 | 235 | 1.00 | 4o8s | 340.7  | 1   | 0.13 |
| 4qr2 | 1398.5 | 230 | 1.00 | 4o8v | 613.5  | 0   | 0.12 |
| 4qva | 1921.1 | 15  | 0.32 | 4o9f | 621.2  | 0   | 0.12 |
| 4qvg | 3542.2 | 190 | 0.88 | 4o9l | 660.7  | 5   | 0.19 |
| 4qvj | 1923.1 | 15  | 0.32 | 4oa6 | 410.0  | 0   | 0.12 |
| 4qxz | 689.0  | 117 | 0.82 | 4ob4 | 577.0  | 64  | 0.70 |
| 4qyx | 532.0  | 7   | 0.22 | 4od4 | 650.6  | 0   | 0.12 |
| 4r0b | 1180.1 | 97  | 0.80 | 4od6 | 423.7  | 0   | 0.12 |
| 4r1i | 1813.7 | 12  | 0.28 | 4odd | 638.8  | 78  | 0.76 |
| 4r1n | 1837.7 | 254 | 1.00 | 4of0 | 898.4  | 0   | 0.12 |
| 4r27 | 890.3  | 0   | 0.12 | 4of5 | 565.9  | 0   | 0.12 |
| 4r3q | 2250.6 | 94  | 0.79 | 4ofv | 574.2  | 0   | 0.12 |
| 4r8e | 2890.5 | 89  | 0.79 | 4ohd | 1073.1 | 0   | 0.12 |
| 4ra8 | 670.7  | 2   | 0.15 | 4ohe | 788.4  | 0   | 0.12 |
| 4rct | 1569.6 | 96  | 0.80 | 4ohh | 873.1  | 0   | 0.12 |
| 4rd9 | 1799.3 | 77  | 0.75 | 4ohi | 825.7  | 0   | 0.12 |
| 4rdj | 1762.0 | 90  | 0.79 | 4ohl | 652.1  | 0   | 0.12 |
| 4rg7 | 2210.3 | 199 | 0.91 | 4ohr | 1356.2 | 306 | 1.00 |
| 4rie | 1498.0 | 76  | 0.75 | 4oj0 | 1524.5 | 139 | 0.83 |
| 4rmb | 2540.6 | 211 | 0.95 | 4ok0 | 290.2  | 0   | 0.12 |
| 4rni | 1077.7 | 29  | 0.47 | 4om9 | 794.9  | 0   | 0.12 |
| 4rnj | 772.9  | 14  | 0.31 | 4oq1 | 1078.4 | 0   | 0.12 |
| 4rns | 2014.2 | 191 | 0.88 | 4oqw | 1470.9 | 225 | 1.00 |
| 4rsj | 2314.0 | 33  | 0.50 | 4orw | 520.5  | 0   | 0.12 |
| 4rsw | 1615.5 | 34  | 0.51 | 4os0 | 1024.8 | 452 | 1.00 |
| 4rvs | 1189.0 | 49  | 0.62 | 4os3 | 1046.9 | 333 | 1.00 |
| 4ry2 | 5221.6 | 20  | 0.38 | 4os8 | 1010.5 | 369 | 1.00 |

|      |        |     |      |      |        |     |      |
|------|--------|-----|------|------|--------|-----|------|
| 4ryj | 476.7  | 0   | 0.12 | 4otd | 731.8  | 0   | 0.12 |
| 4ryp | 3238.5 | 111 | 0.82 | 4ou0 | 280.0  | 7   | 0.22 |
| 4s03 | 851.7  | 49  | 0.62 | 4ow6 | 482.5  | 0   | 0.12 |
| 4s0j | 849.4  | 50  | 0.63 | 4oyl | 381.5  | 0   | 0.12 |
| 4to7 | 1040.6 | 340 | 1.00 | 4oyy | 539.1  | 0   | 0.12 |
| 4tq7 | 774.9  | 108 | 0.81 | 4ozk | 393.0  | 0   | 0.12 |
| 4tqj | 949.5  | 305 | 1.00 | 4p09 | 778.0  | 0   | 0.12 |
| 4tr7 | 1139.1 | 28  | 0.46 | 4p0f | 1184.7 | 19  | 0.36 |
| 4trh | 2343.9 | 16  | 0.33 | 4p0j | 758.0  | 50  | 0.63 |
| 4trt | 1084.6 | 26  | 0.44 | 4p0k | 730.5  | 94  | 0.79 |
| 4ttw | 624.3  | 0   | 0.12 | 4p0l | 748.4  | 6   | 0.20 |
| 4ttx | 826.7  | 283 | 1.00 | 4p0m | 844.4  | 5   | 0.19 |
| 4u2i | 913.8  | 420 | 1.00 | 4p0o | 1113.1 | 23  | 0.41 |
| 4u2u | 3170.2 | 65  | 0.71 | 4p0y | 485.3  | 0   | 0.12 |
| 4u3q | 651.0  | 0   | 0.12 | 4p0z | 476.1  | 0   | 0.12 |
| 4u4i | 925.8  | 11  | 0.27 | 4p17 | 755.8  | 1   | 0.13 |
| 4u5h | 590.7  | 11  | 0.27 | 4p39 | 783.3  | 22  | 0.40 |
| 4u64 | 1516.7 | 129 | 0.83 | 4p47 | 730.3  | 0   | 0.12 |
| 4u9c | 430.5  | 0   | 0.12 | 4p48 | 312.2  | 0   | 0.12 |
| 4ua2 | 1791.7 | 77  | 0.75 | 4p5u | 575.6  | 0   | 0.12 |
| 4uds | 2686.6 | 183 | 0.87 | 4p7o | 1213.8 | 3   | 0.16 |
| 4up8 | 4485.2 | 82  | 0.77 | 4pa1 | 1179.0 | 57  | 0.67 |
| 4uu3 | 1420.2 | 178 | 0.86 | 4pbd | 917.9  | 43  | 0.58 |
| 4uvj | 1053.6 | 13  | 0.29 | 4pcf | 657.7  | 0   | 0.12 |
| 4uzn | 550.4  | 0   | 0.12 | 4pd3 | 1330.8 | 8   | 0.23 |
| 4v1p | 637.6  | 187 | 0.87 | 4pej | 1102.3 | 46  | 0.60 |
| 4v2f | 2260.3 | 121 | 0.82 | 4pek | 665.9  | 0   | 0.12 |
| 4w4r | 996.8  | 34  | 0.51 | 4pgr | 605.0  | 0   | 0.12 |
| 4w69 | 859.5  | 57  | 0.67 | 4pgs | 644.6  | 0   | 0.12 |
| 4w6a | 721.1  | 126 | 0.83 | 4pgu | 550.2  | 2   | 0.15 |
| 4w6c | 921.9  | 79  | 0.76 | 4pgv | 572.7  | 1   | 0.13 |
| 4w6g | 903.5  | 138 | 0.83 | 4ph1 | 682.9  | 70  | 0.73 |
| 4w6h | 714.0  | 69  | 0.73 | 4pjg | 697.2  | 6   | 0.20 |
| 4w6i | 675.5  | 110 | 0.82 | 4pk1 | 480.4  | 0   | 0.12 |
| 4w6k | 770.7  | 78  | 0.76 | 4pk9 | 2832.5 | 86  | 0.78 |
| 4w6l | 959.2  | 18  | 0.35 | 4pka | 2944.0 | 109 | 0.81 |
| 4w6n | 817.4  | 67  | 0.72 | 4pkx | 510.9  | 0   | 0.12 |
| 4w6o | 754.8  | 119 | 0.82 | 4pmh | 582.2  | 0   | 0.12 |
| 4w6p | 915.5  | 57  | 0.67 | 4pn7 | 702.5  | 0   | 0.12 |
| 4w6r | 835.5  | 93  | 0.79 | 4po4 | 622.8  | 0   | 0.12 |
| 4w7x | 819.9  | 83  | 0.77 | 4poy | 441.2  | 0   | 0.12 |
| 4w8i | 3009.0 | 87  | 0.78 | 4ppj | 977.6  | 0   | 0.12 |
| 4wd9 | 3030.4 | 47  | 0.61 | 4ppk | 921.5  | 0   | 0.12 |
| 4whj | 1018.7 | 56  | 0.66 | 4ppl | 1001.2 | 0   | 0.12 |
| 4wic | 2466.7 | 17  | 0.34 | 4pqo | 488.6  | 0   | 0.12 |
| 4wij | 4371.7 | 26  | 0.44 | 4pqz | 377.1  | 0   | 0.12 |
| 4wik | 4164.8 | 28  | 0.46 | 4psd | 472.6  | 0   | 0.12 |
| 4wja | 1393.0 | 369 | 1.00 | 4psf | 595.2  | 8   | 0.23 |
| 4wnz | 1286.8 | 53  | 0.65 | 4pug | 826.8  | 0   | 0.12 |
| 4wo7 | 1830.4 | 241 | 1.00 | 4pui | 476.4  | 0   | 0.12 |
| 4wpe | 3979.6 | 51  | 0.64 | 4pwq | 802.1  | 1   | 0.13 |
| 4wse | 3250.3 | 45  | 0.60 | 4pzp | 538.0  | 0   | 0.12 |
| 4wt5 | 1363.3 | 109 | 0.81 | 4q2s | 467.6  | 0   | 0.12 |

|      |        |     |      |      |        |     |      |
|------|--------|-----|------|------|--------|-----|------|
| 4wum | 2951.4 | 86  | 0.78 | 4q2y | 1153.2 | 8   | 0.23 |
| 4wy8 | 1280.4 | 75  | 0.75 | 4q3h | 460.7  | 172 | 0.85 |
| 4x0r | 1026.9 | 168 | 0.85 | 4q4g | 422.2  | 0   | 0.12 |
| 4x5n | 1515.3 | 43  | 0.58 | 4q4n | 425.5  | 0   | 0.12 |
| 4x5u | 3721.3 | 34  | 0.51 | 4q5y | 1028.2 | 8   | 0.23 |
| 4x8f | 1205.5 | 354 | 1.00 | 4q65 | 58.7   | 0   | 0.12 |
| 4xa1 | 3974.0 | 11  | 0.27 | 4q6l | 600.1  | 0   | 0.12 |
| 4xa3 | 3674.4 | 13  | 0.29 | 4q6v | 559.9  | 0   | 0.12 |
| 4xa4 | 2472.8 | 24  | 0.42 | 4q6z | 625.4  | 0   | 0.12 |
| 4xa6 | 4370.0 | 9   | 0.24 | 4q7k | 355.4  | 0   | 0.12 |
| 4xbx | 1614.6 | 202 | 0.92 | 4q7m | 1390.7 | 166 | 0.84 |
| 4xlx | 1062.3 | 77  | 0.75 | 4q7t | 528.1  | 0   | 0.12 |
| 4xo1 | 1576.0 | 209 | 0.94 | 4q9h | 661.2  | 0   | 0.12 |
| 4xo2 | 1581.3 | 220 | 1.00 | 4q9p | 775.3  | 58  | 0.68 |
| 4xoh | 1083.9 | 6   | 0.20 | 4qaj | 584.1  | 46  | 0.60 |
| 4xws | 1050.8 | 49  | 0.62 | 4qaz | 634.2  | 1   | 0.13 |
| 4xyg | 3638.3 | 188 | 0.88 | 4qb0 | 467.1  | 0   | 0.12 |
| 4xz7 | 2973.9 | 89  | 0.79 | 4qbe | 634.5  | 25  | 0.43 |
| 4y0m | 1294.5 | 92  | 0.79 | 4qcj | 472.0  | 14  | 0.31 |
| 4y9a | 1662.8 | 218 | 0.99 | 4qdr | 682.2  | 0   | 0.12 |
| 4ylt | 1916.7 | 186 | 0.87 | 4qdt | 562.9  | 0   | 0.12 |
| 4ymr | 2237.6 | 80  | 0.76 | 4qdu | 659.9  | 0   | 0.12 |
| 4ynh | 1528.6 | 297 | 1.00 | 4qgy | 573.2  | 0   | 0.12 |
| 4yub | 2778.3 | 74  | 0.74 | 4qlo | 1517.2 | 96  | 0.80 |
| 4zyz | 1008.9 | 39  | 0.55 | 4qlr | 618.0  | 2   | 0.15 |
| 4z27 | 1546.0 | 99  | 0.80 | 4qmd | 653.3  | 0   | 0.12 |
| 4z6j | 1571.1 | 157 | 0.84 | 4qmi | 856.6  | 0   | 0.12 |
| 4zbh | 510.6  | 171 | 0.85 | 4qmj | 902.9  | 0   | 0.12 |
| 4zbw | 472.6  | 0   | 0.12 | 4qs8 | 630.1  | 0   | 0.12 |
| 4zm8 | 3174.8 | 43  | 0.58 | 4qt4 | 599.0  | 0   | 0.12 |
| 4zqa | 1794.3 | 58  | 0.68 | 4qtz | 630.7  | 0   | 0.12 |
| 5a0o | 974.7  | 0   | 0.12 | 4quc | 200.4  | 0   | 0.12 |
| 5a2n | 1096.1 | 0   | 0.12 | 4quk | 419.9  | 0   | 0.12 |
| 5a48 | 778.2  | 1   | 0.13 | 4qx0 | 1356.7 | 12  | 0.28 |
| 5bto | 876.8  | 22  | 0.40 | 4qx1 | 1328.2 | 6   | 0.20 |
|      |        |     |      | 4qx2 | 1335.0 | 11  | 0.27 |
|      |        |     |      | 4qx3 | 1326.8 | 9   | 0.24 |
|      |        |     |      | 4qxl | 385.4  | 0   | 0.12 |
|      |        |     |      | 4r05 | 588.3  | 0   | 0.12 |
|      |        |     |      | 4r0e | 452.6  | 30  | 0.48 |
|      |        |     |      | 4r0x | 671.7  | 0   | 0.12 |
|      |        |     |      | 4r0y | 793.2  | 0   | 0.12 |
|      |        |     |      | 4r19 | 706.5  | 0   | 0.12 |
|      |        |     |      | 4r1a | 468.7  | 0   | 0.12 |
|      |        |     |      | 4r1b | 536.5  | 0   | 0.12 |
|      |        |     |      | 4r1c | 549.8  | 0   | 0.12 |
|      |        |     |      | 4r58 | 574.3  | 0   | 0.12 |
|      |        |     |      | 4r61 | 710.9  | 31  | 0.49 |
|      |        |     |      | 4r6f | 782.0  | 0   | 0.12 |
|      |        |     |      | 4r7v | 757.5  | 4   | 0.18 |
|      |        |     |      | 4r8r | 680.7  | 0   | 0.12 |
|      |        |     |      | 4rcw | 1336.8 | 22  | 0.40 |
|      |        |     |      | 4rdp | 1381.7 | 111 | 0.82 |

|      |        |     |      |
|------|--------|-----|------|
| 4reh | 643.8  | 0   | 0.12 |
| 4rej | 614.6  | 0   | 0.12 |
| 4rf6 | 896.8  | 0   | 0.12 |
| 4rid | 1471.5 | 4   | 0.18 |
| 4rl1 | 661.6  | 0   | 0.12 |
| 4rl9 | 506.7  | 0   | 0.12 |
| 4rlb | 816.1  | 0   | 0.12 |
| 4rlm | 560.4  | 0   | 0.12 |
| 4rln | 568.5  | 0   | 0.12 |
| 4ro1 | 226.8  | 0   | 0.12 |
| 4roa | 729.3  | 27  | 0.45 |
| 4rs6 | 869.0  | 122 | 0.82 |
| 4rsq | 767.9  | 28  | 0.46 |
| 4rsx | 933.4  | 0   | 0.12 |
| 4rtd | 1339.0 | 1   | 0.13 |
| 4rth | 1038.2 | 32  | 0.49 |
| 4rwi | 1184.5 | 55  | 0.66 |
| 4rwq | 645.6  | 0   | 0.12 |
| 4rwr | 1023.5 | 86  | 0.78 |
| 4rwu | 734.0  | 46  | 0.60 |
| 4rwz | 895.4  | 91  | 0.79 |
| 4ry4 | 939.0  | 0   | 0.12 |
| 4ry6 | 963.0  | 0   | 0.12 |
| 4ry7 | 958.1  | 0   | 0.12 |
| 4rz2 | 769.4  | 0   | 0.12 |
| 4s11 | 565.3  | 0   | 0.12 |
| 4s3l | 495.4  | 2   | 0.15 |
| 4s3p | 2064.0 | 46  | 0.60 |
| 4tks | 1025.6 | 43  | 0.58 |
| 4tlp | 587.8  | 0   | 0.12 |
| 4tlw | 863.4  | 0   | 0.12 |
| 4tn9 | 489.6  | 0   | 0.12 |
| 4tnm | 642.4  | 0   | 0.12 |
| 4tql | 785.7  | 0   | 0.12 |
| 4tr5 | 1340.3 | 222 | 1.00 |
| 4trk | 536.2  | 0   | 0.12 |
| 4tse | 1057.9 | 26  | 0.44 |
| 4ttl | 125.0  | 0   | 0.12 |
| 4ttp | 530.3  | 0   | 0.12 |
| 4tum | 515.8  | 11  | 0.27 |
| 4tut | 161.3  | 96  | 0.80 |
| 4tuu | 517.7  | 0   | 0.12 |
| 4tve | 480.4  | 2   | 0.15 |
| 4tx2 | 695.4  | 0   | 0.12 |
| 4txp | 464.4  | 0   | 0.12 |
| 4tza | 906.5  | 9   | 0.24 |
| 4tzg | 1452.9 | 96  | 0.80 |
| 4tzi | 605.0  | 0   | 0.12 |
| 4tzj | 640.7  | 0   | 0.12 |
| 4u0l | 753.8  | 0   | 0.12 |
| 4u1d | 1336.3 | 3   | 0.16 |
| 4u2m | 664.7  | 17  | 0.34 |
| 4u2n | 698.3  | 224 | 1.00 |

|      |        |     |      |
|------|--------|-----|------|
| 4u3a | 1320.8 | 202 | 0.92 |
| 4u3h | 795.9  | 0   | 0.12 |
| 4u3t | 871.0  | 2   | 0.15 |
| 4u3v | 631.7  | 0   | 0.12 |
| 4u48 | 4122.1 | 21  | 0.39 |
| 4u4h | 1423.8 | 1   | 0.13 |
| 4u4j | 4204.9 | 24  | 0.42 |
| 4u59 | 4234.2 | 24  | 0.42 |
| 4u5a | 629.0  | 0   | 0.12 |
| 4u9q | 724.9  | 28  | 0.46 |
| 4ud5 | 886.9  | 0   | 0.12 |
| 4uex | 709.7  | 0   | 0.12 |
| 4ulw | 859.8  | 132 | 0.83 |
| 4umg | 601.3  | 9   | 0.24 |
| 4ums | 460.4  | 6   | 0.20 |
| 4uos | 526.4  | 22  | 0.40 |
| 4uts | 752.4  | 0   | 0.12 |
| 4uu4 | 881.4  | 17  | 0.34 |
| 4uv2 | 1979.0 | 80  | 0.76 |
| 4uv6 | 799.7  | 72  | 0.74 |
| 4uvk | 744.7  | 0   | 0.12 |
| 4uw2 | 1029.0 | 0   | 0.12 |
| 4uww | 441.0  | 250 | 1.00 |
| 4uy3 | 418.9  | 0   | 0.12 |
| 4uz2 | 739.0  | 5   | 0.19 |
| 4v0t | 978.3  | 152 | 0.83 |
| 4v14 | 423.1  | 0   | 0.12 |
| 4v16 | 789.0  | 0   | 0.12 |
| 4v2b | 539.8  | 0   | 0.12 |
| 4v2d | 696.1  | 0   | 0.12 |
| 4v2e | 1539.3 | 0   | 0.12 |
| 4v2u | 357.2  | 0   | 0.12 |
| 4v38 | 372.1  | 0   | 0.12 |
| 4v39 | 359.2  | 0   | 0.12 |
| 4w4m | 595.1  | 0   | 0.12 |
| 4w5x | 437.2  | 18  | 0.35 |
| 4w60 | 399.3  | 37  | 0.54 |
| 4w6v | 673.6  | 0   | 0.12 |
| 4w7g | 525.1  | 0   | 0.12 |
| 4w8v | 2072.4 | 302 | 1.00 |
| 4w8w | 1381.4 | 116 | 0.82 |
| 4w8z | 1533.3 | 143 | 0.83 |
| 4wau | 818.2  | 16  | 0.33 |
| 4wbz | 673.2  | 22  | 0.40 |
| 4wdc | 428.5  | 0   | 0.12 |
| 4we2 | 291.9  | 0   | 0.12 |
| 4wfi | 551.9  | 0   | 0.12 |
| 4wj1 | 1240.1 | 33  | 0.50 |
| 4wj2 | 595.3  | 0   | 0.12 |
| 4wjs | 491.1  | 0   | 0.12 |
| 4wmg | 599.5  | 0   | 0.12 |
| 4wo8 | 844.0  | 0   | 0.12 |
| 4woy | 1029.5 | 44  | 0.59 |

|      |        |     |      |
|------|--------|-----|------|
| 4wp6 | 558.9  | 0   | 0.12 |
| 4wt3 | 425.1  | 0   | 0.12 |
| 4wtx | 501.6  | 3   | 0.16 |
| 4wu0 | 868.2  | 11  | 0.27 |
| 4wz0 | 701.2  | 48  | 0.62 |
| 4x0j | 912.8  | 0   | 0.12 |
| 4x2m | 562.7  | 0   | 0.12 |
| 4x2w | 1095.6 | 44  | 0.59 |
| 4x2x | 580.8  | 4   | 0.18 |
| 4x2y | 805.9  | 38  | 0.54 |
| 4x3x | 712.4  | 0   | 0.12 |
| 4x43 | 643.0  | 0   | 0.12 |
| 4x8h | 974.2  | 6   | 0.20 |
| 4x8m | 978.8  | 0   | 0.12 |
| 4x9u | 375.5  | 0   | 0.12 |
| 4xah | 703.5  | 311 | 1.00 |
| 4xeh | 5944.1 | 35  | 0.52 |
| 4xfu | 599.9  | 0   | 0.12 |
| 4xfv | 758.8  | 0   | 0.12 |
| 4xh3 | 767.8  | 0   | 0.12 |
| 4xhm | 554.3  | 3   | 0.16 |
| 4xkk | 495.8  | 1   | 0.13 |
| 4xm4 | 1840.7 | 79  | 0.76 |
| 4xp8 | 487.4  | 17  | 0.34 |
| 4xpk | 578.7  | 0   | 0.12 |
| 4xq7 | 607.0  | 0   | 0.12 |
| 4xy3 | 578.5  | 0   | 0.12 |
| 4xzg | 666.3  | 0   | 0.12 |
| 4y21 | 1200.0 | 28  | 0.46 |
| 4y4q | 858.6  | 9   | 0.24 |
| 4y5j | 1107.5 | 16  | 0.33 |
| 4yeq | 874.7  | 17  | 0.34 |
| 4yf2 | 735.9  | 0   | 0.12 |
| 4yfe | 383.1  | 0   | 0.12 |
| 4yfs | 692.9  | 0   | 0.12 |
| 4yhe | 555.5  | 0   | 0.12 |
| 4ykc | 961.7  | 22  | 0.40 |
| 4ykd | 532.1  | 0   | 0.12 |
| 4yno | 880.1  | 0   | 0.12 |
| 4ynv | 644.0  | 203 | 0.92 |
| 4ynw | 651.0  | 246 | 1.00 |
| 4ypj | 838.6  | 0   | 0.12 |
| 4yuo | 353.0  | 0   | 0.12 |
| 4yvm | 1688.5 | 20  | 0.38 |
| 4yvo | 482.7  | 0   | 0.12 |
| 4z29 | 938.1  | 29  | 0.47 |
| 4z99 | 583.3  | 0   | 0.12 |
| 4z9p | 781.4  | 67  | 0.72 |
| 4zf3 | 739.3  | 15  | 0.32 |
| 4zf4 | 587.1  | 22  | 0.40 |
| 4zf5 | 749.1  | 38  | 0.54 |
| 4zg1 | 539.5  | 0   | 0.12 |
| 4zj2 | 454.2  | 0   | 0.12 |

|         |        |       |      |
|---------|--------|-------|------|
| 4zj3    | 404.1  | 0     | 0.12 |
| 4zmd    | 382.5  | 0     | 0.12 |
| 4zot    | 532.0  | 0     | 0.12 |
| 4zov    | 1138.3 | 158   | 0.84 |
| 4zoy    | 734.9  | 0     | 0.12 |
| 4zuz    | 1005.3 | 5     | 0.19 |
| 4zwj    | 1081.6 | 0     | 0.12 |
| 5a0g    | 720.4  | 0     | 0.12 |
| 5a0z    | 1330.2 | 37    | 0.54 |
| 5aem    | 898.4  | 4     | 0.18 |
| 5af5    | 291.9  | 0     | 0.12 |
| 5aio    | 872.5  | 104   | 0.81 |
| 5aj8    | 671.6  | 0     | 0.12 |
| 5avg    | 710.4  | 13    | 0.29 |
| 5avh    | 4608.7 | 89    | 0.79 |
| 5brl    | 535.8  | 5     | 0.19 |
| 5bth    | 695.4  | 12    | 0.28 |
| 5bvq    | 607.2  | 3     | 0.16 |
| 5c00    | 915.8  | 149   | 0.83 |
| 5c86    | 431.7  | 0     | 0.12 |
| Average | 1635.0 | 111.7 | 0.68 |
| Std Dev | 1029.7 | 98.7  | 0.27 |
| Average | 793.6  | 26.8  | 0.28 |
| Std Dev | 528.2  | 62.5  | 0.26 |

<sup>a</sup> Test set selection was based on the following criteria: (1) PDB release date between January 2014 and August 2015; (2) no ligands in structure; (3) only a single type of protein in the structure, i.e., no heterodimers; and (4) the PDB file describes author determined biological units to assess the biological assembly as suggested by the authors.

**Table S10.** Classification of test set dimers by three methods<sup>a,b</sup>

| PDB ID | ClusPro<br>probability of<br>dimer | EPPIC | PISA<br>multimer<br>class | PISA status |
|--------|------------------------------------|-------|---------------------------|-------------|
| 3w66   | 0.12                               | xtal  | dimer                     | uncertain   |
| 3w8g   | 0.87                               | xtal  | dimer                     | stable      |
| 3we1   | 0.13                               | xtal  | monomer                   | stable      |
| 3wfi   | 1.00                               | bio   | dimer                     | stable      |
| 3wjk   | 0.89                               | bio   | dimer                     | stable      |
| 3wkw   | 0.77                               | bio   | dimer                     | stable      |
| 3wmd   | 0.61                               | bio   | dimer                     | stable      |
| 3wo8   | 0.81                               | bio   | dimer                     | stable      |
| 3wpx   | 0.86                               | bio   | dimer                     | uncertain   |
| 3wsc   | 0.13                               | bio   | dimer                     | stable      |
| 3wtz   | 0.74                               | xtal  | dimer                     | stable      |
| 3wu0   | 0.78                               | xtal  | dimer                     | stable      |
| 3wva   | 0.83                               | bio   | dimer                     | stable      |
| 3wvb   | 0.84                               | bio   | dimer                     | stable      |
| 3wvo   | 0.76                               | bio   | dimer                     | stable      |
| 3wvz   | 0.77                               | bio   | tetramer                  | stable      |
| 3wx4   | 0.84                               | xtal  | dimer                     | stable      |
| 3wxi   | 0.83                               | bio   | dimer                     | stable      |
| 3wy7   | 0.82                               | bio   | dimer                     | stable      |
| 3wyb   | 0.80                               | bio   | dimer                     | stable      |
| 3wyd   | 0.72                               | xtal  | dimer                     | stable      |
| 3wzg   | 0.84                               | bio   | dimer                     | stable      |
| 4bhy   | 0.54                               | bio   | tetramer                  | stable      |
| 4c7v   | 0.76                               | bio   | dimer                     | stable      |
| 4c88   | 0.79                               | bio   | 16-mer                    | stable      |
| 4cbv   | 0.65                               | bio   | dimer                     | stable      |
| 4chk   | 0.62                               | bio   | monomer                   | stable      |
| 4cij   | 0.54                               | bio   | dimer                     | stable      |
| 4ckk   | 0.66                               | bio   | dimer                     | stable      |
| 4ckn   | 0.77                               | xtal  | dimer                     | stable      |
| 4cmz   | 1.00                               | bio   | dimer                     | stable      |
| 4cop   | 0.83                               | xtal  | dimer                     | uncertain   |
| 4cti   | 0.70                               | bio   | dimer                     | stable      |
| 4cu5   | 1.00                               | bio   | dimer                     | stable      |
| 4cw9   | 0.12                               | xtal  | dimer                     | stable      |
| 4cwc   | 0.64                               | bio   | tetramer                  | stable      |
| 4cwe   | 0.48                               | bio   | dimer                     | stable      |
| 4cxj   | 0.83                               | bio   | dimer                     | stable      |
| 4d28   | 0.51                               | xtal  | dimer                     | stable      |
| 4d5s   | 0.83                               | bio   | dimer                     | stable      |
| 4d6k   | 1.00                               | bio   | dimer                     | stable      |
| 4fb8   | 0.81                               | bio   | dimer                     | stable      |
| 4ihe   | 0.82                               | bio   | tetramer                  | stable      |
| 4j0e   | 0.96                               | bio   | dimer                     | stable      |
| 4j0f   | 0.97                               | bio   | dimer                     | stable      |
| 4j7a   | 0.82                               | bio   | tetramer                  | stable      |
| 4j7r   | 1.00                               | bio   | dimer                     | stable      |



|      |      |      |           |           |
|------|------|------|-----------|-----------|
| 4jgm | 0.12 | bio  | dimer     | uncertain |
| 4jp2 | 0.47 | bio  | tetramer  | stable    |
| 4ju5 | 0.97 | bio  | dimer     | stable    |
| 4jup | 0.38 | xtal | dimer     | uncertain |
| 4k2e | 0.84 | bio  | dimer     | stable    |
| 4kde | 1.00 | bio  | dimer     | stable    |
| 4ke2 | 0.18 | xtal | hexamer   | stable    |
| 4km3 | 0.83 | xtal | dimer     | stable    |
| 4kn8 | 1.00 | bio  | dimer     | stable    |
| 4kp2 | 0.57 | bio  | dimer     | stable    |
| 4kz1 | 0.81 | bio  | dimer     | stable    |
| 4l2w | 0.61 | xtal | tetramer  | stable    |
| 4l4q | 0.74 | bio  | tetramer  | stable    |
| 4l69 | 0.83 | bio  | dimer     | stable    |
| 4l9e | 1.00 | bio  | dimer     | stable    |
| 4le5 | 0.60 | bio  | dimer     | stable    |
| 4lft | 0.12 | bio  | monomer   | stable    |
| 4ljk | 0.89 | bio  | dimer     | uncertain |
| 4ljl | 0.96 | bio  | dimer     | stable    |
| 4lpu | 0.80 | bio  | tetramer  | stable    |
| 4lpw | 0.74 | bio  | hexamer   | stable    |
| 4lpx | 0.63 | bio  | hexamer   | stable    |
| 4ltb | 0.35 | bio  | dimer     | stable    |
| 4luy | 0.82 | bio  | dimer     | stable    |
| 4lwo | 0.81 | bio  | dimer     | stable    |
| 4m0d | 0.66 | bio  | tetramer  | stable    |
| 4m0q | 0.77 | xtal | dimer     | stable    |
| 4m23 | 0.78 | bio  | dimer     | stable    |
| 4m36 | 0.61 | bio  | dimer     | stable    |
| 4m6a | 0.82 | bio  | dimer     | stable    |
| 4m8z | 0.81 | bio  | dimer     | stable    |
| 4mac | 0.81 | bio  | monomer   | stable    |
| 4mdu | 0.19 | xtal | dimer     | stable    |
| 4mea | 1.00 | bio  | dimer     | stable    |
| 4mei | 0.31 | bio  | dimer     | stable    |
| 4mfu | 0.12 | xtal | monomer   | stable    |
| 4mfv | 0.12 | xtal | monomer   | stable    |
| 4mid | 0.89 | bio  | dimer     | stable    |
| 4mir | 0.87 | bio  | dimer     | stable    |
| 4mis | 0.93 | bio  | dimer     | stable    |
| 4ml3 | 0.64 | bio  | dimer     | uncertain |
| 4mld | 0.67 | bio  | dodecamer | stable    |
| 4mmn | 1.00 | bio  | dimer     | stable    |
| 4mpl | 0.83 | bio  | dimer     | stable    |
| 4mt8 | 0.61 | bio  | tetramer  | stable    |
| 4mtx | 0.59 | bio  | octomer   | stable    |
| 4muo | 0.81 | bio  | dimer     | stable    |
| 4mxm | 0.83 | bio  | dimer     | stable    |
| 4myc | 0.26 | bio  | dimer     | stable    |
| 4myz | 1.00 | bio  | dimer     | stable    |
| 4mzm | 1.00 | bio  | dimer     | stable    |
| 4mzp | 0.99 | bio  | dimer     | stable    |
| 4mzt | 0.86 | bio  | dimer     | stable    |

|      |      |      |          |           |
|------|------|------|----------|-----------|
| 4n06 | 0.66 | bio  | dimer    | stable    |
| 4n1k | 0.40 | bio  | tetramer | stable    |
| 4n1y | 0.87 | bio  | dimer    | stable    |
| 4n92 | 0.12 | xtal | monomer  | stable    |
| 4n9h | 0.84 | bio  | dimer    | stable    |
| 4na2 | 0.76 | bio  | dimer    | stable    |
| 4ncd | 0.83 | xtal | monomer  | stable    |
| 4ndj | 0.73 | bio  | tetramer | stable    |
| 4ndk | 0.83 | bio  | dimer    | stable    |
| 4ndw | 0.91 | bio  | dimer    | stable    |
| 4nj0 | 1.00 | xtal | dimer    | stable    |
| 4nj1 | 0.98 | xtal | dimer    | stable    |
| 4nk7 | 0.60 | bio  | tetramer | uncertain |
| 4nkk | 1.00 | bio  | dimer    | stable    |
| 4nn1 | 1.00 | bio  | dimer    | stable    |
| 4nom | 0.12 | xtal | dimer    | uncertain |
| 4npu | 1.00 | bio  | dimer    | stable    |
| 4nqf | 0.49 | xtal | dimer    | stable    |
| 4nqt | 0.72 | bio  | dimer    | stable    |
| 4nsr | 0.83 | xtal | dimer    | stable    |
| 4nsw | 0.31 | bio  | dimer    | stable    |
| 4ny0 | 0.12 | xtal | dimer    | stable    |
| 4o0q | 1.00 | bio  | dimer    | stable    |
| 4o1h | 1.00 | bio  | dimer    | stable    |
| 4o2h | 0.38 | xtal | dimer    | stable    |
| 4o60 | 0.13 | bio  | dimer    | stable    |
| 4o8b | 1.00 | bio  | dimer    | stable    |
| 4oaf | 0.46 | bio  | monomer  | stable    |
| 4oft | 1.00 | bio  | dimer    | stable    |
| 4ogd | 0.73 | bio  | dimer    | stable    |
| 4ogf | 0.83 | bio  | dimer    | stable    |
| 4oh9 | 0.83 | bio  | dimer    | stable    |
| 4oi3 | 1.00 | bio  | dimer    | stable    |
| 4okc | 0.83 | bio  | dimer    | stable    |
| 4oky | 0.44 | xtal | dimer    | stable    |
| 4om7 | 0.49 | bio  | dimer    | stable    |
| 4omt | 0.28 | bio  | monomer  | stable    |
| 4ooi | 0.99 | bio  | dimer    | stable    |
| 4or8 | 0.81 | bio  | dimer    | stable    |
| 4otm | 0.83 | bio  | dimer    | stable    |
| 4oun | 0.85 | bio  | dimer    | stable    |
| 4p08 | 0.55 | xtal | dimer    | stable    |
| 4p12 | 0.54 | bio  | dimer    | stable    |
| 4p22 | 0.66 | bio  | dimer    | stable    |
| 4p61 | 1.00 | bio  | dimer    | stable    |
| 4p6k | 0.23 | bio  | tetramer | stable    |
| 4p6l | 0.13 | xtal | dimer    | stable    |
| 4p96 | 0.80 | bio  | dimer    | stable    |
| 4p9f | 0.81 | bio  | hexamer  | stable    |
| 4pd0 | 0.56 | bio  | dimer    | stable    |
| 4pdp | 0.12 | xtal | monomer  | stable    |
| 4pgg | 0.82 | bio  | dimer    | stable    |
| 4ph6 | 0.83 | bio  | dimer    | stable    |

|      |      |      |          |           |
|------|------|------|----------|-----------|
| 4pmu | 0.82 | bio  | dimer    | stable    |
| 4pn0 | 0.85 | bio  | dimer    | stable    |
| 4pon | 1.00 | bio  | dimer    | stable    |
| 4prs | 0.82 | bio  | dimer    | stable    |
| 4pu7 | 1.00 | xtal | dimer    | stable    |
| 4pu8 | 1.00 | xtal | dimer    | stable    |
| 4puh | 1.00 | bio  | dimer    | uncertain |
| 4pus | 0.12 | xtal | dimer    | uncertain |
| 4pvc | 0.80 | xtal | monomer  | stable    |
| 4pz9 | 0.32 | bio  | dimer    | uncertain |
| 4pzc | 0.91 | bio  | hexamer  | stable    |
| 4q0c | 0.73 | bio  | dimer    | stable    |
| 4q20 | 0.81 | bio  | tetramer | stable    |
| 4q25 | 0.65 | bio  | dimer    | stable    |
| 4q2o | 1.00 | bio  | dimer    | stable    |
| 4q2q | 1.00 | bio  | dimer    | stable    |
| 4q75 | 0.80 | bio  | dimer    | stable    |
| 4q76 | 0.80 | bio  | dimer    | stable    |
| 4q97 | 0.44 | bio  | dimer    | stable    |
| 4q9b | 0.83 | xtal | dimer    | stable    |
| 4qfb | 0.12 | xtal | monomer  | stable    |
| 4qhr | 0.83 | bio  | dimer    | stable    |
| 4qjn | 0.84 | bio  | dimer    | stable    |
| 4ql6 | 0.12 | bio  | dimer    | uncertain |
| 4qr0 | 1.00 | bio  | dimer    | stable    |
| 4qr1 | 1.00 | bio  | dimer    | stable    |
| 4qr2 | 1.00 | bio  | dimer    | stable    |
| 4qva | 0.32 | bio  | dimer    | stable    |
| 4qvg | 0.88 | bio  | dimer    | stable    |
| 4qvj | 0.32 | bio  | dimer    | stable    |
| 4qxz | 0.82 | bio  | dimer    | uncertain |
| 4qyx | 0.22 | xtal | monomer  | stable    |
| 4r0b | 0.80 | bio  | dimer    | stable    |
| 4r1i | 0.28 | bio  | dimer    | stable    |
| 4r1n | 1.00 | bio  | hexamer  | stable    |
| 4r27 | 0.12 | bio  | monomer  | stable    |
| 4r3q | 0.79 | bio  | hexamer  | stable    |
| 4r8e | 0.79 | bio  | dimer    | stable    |
| 4ra8 | 0.15 | xtal | dimer    | stable    |
| 4rct | 0.80 | bio  | dimer    | stable    |
| 4rd9 | 0.75 | bio  | dimer    | stable    |
| 4rdj | 0.79 | xtal | dimer    | stable    |
| 4rg7 | 0.91 | bio  | dimer    | stable    |
| 4rie | 0.75 | bio  | dimer    | stable    |
| 4rmb | 0.95 | bio  | dimer    | stable    |
| 4rni | 0.47 | bio  | dimer    | stable    |
| 4rnj | 0.31 | xtal | monomer  | stable    |
| 4rns | 0.88 | bio  | dimer    | stable    |
| 4rsj | 0.50 | bio  | dimer    | stable    |
| 4rsw | 0.51 | bio  | dimer    | stable    |
| 4rvs | 0.62 | bio  | dimer    | stable    |
| 4ry2 | 0.38 | bio  | dimer    | stable    |
| 4ryj | 0.12 | xtal | dimer    | stable    |

|      |      |      |          |           |
|------|------|------|----------|-----------|
| 4ryp | 0.82 | bio  | dimer    | stable    |
| 4s03 | 0.62 | xtal | dimer    | uncertain |
| 4s0j | 0.63 | xtal | dimer    | uncertain |
| 4to7 | 1.00 | xtal | monomer  | stable    |
| 4tq7 | 0.81 | xtal | dimer    | uncertain |
| 4tqj | 1.00 | xtal | monomer  | stable    |
| 4tr7 | 0.46 | bio  | dimer    | stable    |
| 4trh | 0.33 | bio  | dimer    | stable    |
| 4trt | 0.44 | bio  | dimer    | stable    |
| 4ttw | 0.12 | xtal | dimer    | stable    |
| 4ttx | 1.00 | bio  | dimer    | stable    |
| 4u2i | 1.00 | bio  | dimer    | uncertain |
| 4u2u | 0.71 | bio  | dimer    | stable    |
| 4u3q | 0.12 | xtal | dimer    | uncertain |
| 4u4i | 0.27 | bio  | monomer  | stable    |
| 4u5h | 0.27 | xtal | dimer    | stable    |
| 4u64 | 0.83 | xtal | dimer    | stable    |
| 4u9c | 0.12 | xtal | monomer  | stable    |
| 4ua2 | 0.75 | bio  | octomer  | stable    |
| 4uds | 0.87 | bio  | dimer    | stable    |
| 4up8 | 0.77 | bio  | dimer    | stable    |
| 4uu3 | 0.86 | bio  | dimer    | stable    |
| 4uvj | 0.29 | xtal | dimer    | stable    |
| 4uzn | 0.12 | xtal | monomer  | stable    |
| 4v1p | 0.87 | xtal | dimer    | stable    |
| 4v2f | 0.82 | bio  | dimer    | stable    |
| 4w4r | 0.51 | bio  | dimer    | stable    |
| 4w69 | 0.67 | xtal | monomer  | stable    |
| 4w6a | 0.83 | xtal | monomer  | stable    |
| 4w6c | 0.76 | bio  | dimer    | stable    |
| 4w6g | 0.83 | bio  | monomer  | stable    |
| 4w6h | 0.73 | xtal | monomer  | stable    |
| 4w6i | 0.82 | xtal | monomer  | stable    |
| 4w6k | 0.76 | xtal | dimer    | uncertain |
| 4w6l | 0.35 | xtal | tetramer | stable    |
| 4w6n | 0.72 | xtal | monomer  | stable    |
| 4w6o | 0.82 | xtal | tetramer | stable    |
| 4w6p | 0.67 | xtal | monomer  | stable    |
| 4w6r | 0.79 | xtal | monomer  | stable    |
| 4w7x | 0.77 | xtal | monomer  | stable    |
| 4w8i | 0.78 | bio  | dimer    | stable    |
| 4wd9 | 0.61 | bio  | dimer    | stable    |
| 4whj | 0.66 | bio  | dimer    | stable    |
| 4wic | 0.34 | bio  | dimer    | stable    |
| 4wij | 0.44 | bio  | dimer    | stable    |
| 4wik | 0.46 | bio  | dimer    | stable    |
| 4wja | 1.00 | bio  | dimer    | stable    |
| 4wnz | 0.65 | bio  | monomer  | stable    |
| 4wo7 | 1.00 | bio  | dimer    | stable    |
| 4wpe | 0.64 | bio  | dimer    | stable    |
| 4wse | 0.60 | bio  | dimer    | stable    |
| 4wt5 | 0.81 | bio  | dimer    | stable    |
| 4wum | 0.78 | bio  | dimer    | stable    |

|      |      |      |         |           |
|------|------|------|---------|-----------|
| 4wy8 | 0.75 | bio  | dimer   | stable    |
| 4x0r | 0.85 | bio  | dimer   | stable    |
| 4x5n | 0.58 | bio  | dimer   | stable    |
| 4x5u | 0.51 | bio  | dimer   | stable    |
| 4x8f | 1.00 | bio  | dimer   | stable    |
| 4xa1 | 0.27 | bio  | dimer   | stable    |
| 4xa3 | 0.29 | bio  | dimer   | stable    |
| 4xa4 | 0.42 | bio  | dimer   | stable    |
| 4xa6 | 0.24 | bio  | octomer | stable    |
| 4xbx | 0.92 | bio  | dimer   | stable    |
| 4xlx | 0.75 | bio  | dimer   | stable    |
| 4xo1 | 0.94 | bio  | dimer   | stable    |
| 4xo2 | 1.00 | bio  | dimer   | stable    |
| 4xoh | 0.20 | bio  | dimer   | stable    |
| 4xws | 0.62 | bio  | dimer   | stable    |
| 4xyg | 0.88 | bio  | dimer   | stable    |
| 4xz7 | 0.79 | bio  | dimer   | stable    |
| 4y0m | 0.79 | bio  | dimer   | stable    |
| 4y9a | 0.99 | bio  | dimer   | stable    |
| 4ylt | 0.87 | bio  | dimer   | stable    |
| 4ymr | 0.76 | bio  | dimer   | stable    |
| 4ynh | 1.00 | bio  | dimer   | stable    |
| 4yub | 0.74 | bio  | dimer   | stable    |
| 4zyz | 0.55 | bio  | dimer   | stable    |
| 4z27 | 0.80 | bio  | dimer   | stable    |
| 4z6j | 0.84 | bio  | octomer | stable    |
| 4zbh | 0.85 | bio  | dimer   | uncertain |
| 4zbw | 0.12 | xtal | monomer | stable    |
| 4zm8 | 0.58 | bio  | dimer   | stable    |
| 4zqa | 0.68 | xtal | dimer   | stable    |
| 5a0o | 0.12 | bio  | dimer   | stable    |
| 5a2n | 0.12 | xtal | dimer   | stable    |
| 5a48 | 0.13 | bio  | dimer   | uncertain |
| 5bto | 0.40 | bio  | monomer | stable    |

<sup>a</sup> yellow: incorrect classification

<sup>b</sup> Criteria for test selection are given in Table S9

**Table S11.** Classification of test set monomers by three methods<sup>a,b</sup>

| PDB ID | ClusPro probability of dimer | EPPIC | PISA multimer class | PISA status |
|--------|------------------------------|-------|---------------------|-------------|
| 3w6r   | 0.65                         | xtal  | monomer             | stable      |
| 3w94   | 0.12                         | xtal  | monomer             | stable      |
| 3w9g   | 0.23                         | xtal  | dimer               | stable      |
| 3wbi   | 0.12                         | bio   | monomer             | stable      |
| 3wbj   | 0.68                         | xtal  | monomer             | stable      |
| 3wdf   | 0.58                         | xtal  | monomer             | stable      |
| 3wea   | 0.12                         | xtal  | dimer               | stable      |
| 3who   | 0.13                         | bio   | monomer             | stable      |
| 3wj9   | 0.12                         | xtal  | monomer             | stable      |
| 3wo9   | 0.12                         | bio   | monomer             | stable      |
| 3wob   | 0.13                         | xtal  | monomer             | stable      |
| 3wp3   | 0.12                         | xtal  | monomer             | stable      |
| 3wp9   | 0.41                         | xtal  | dimer               | stable      |
| 3wpj   | 0.12                         | bio   | monomer             | stable      |
| 3wpy   | 0.19                         | xtal  | monomer             | stable      |
| 3wpz   | 0.43                         | xtal  | monomer             | stable      |
| 3wrt   | 0.12                         | xtal  | monomer             | stable      |
| 3wuq   | 0.12                         | xtal  | monomer             | stable      |
| 3wuy   | 0.12                         | bio   | dimer               | stable      |
| 3wv4   | 0.12                         | xtal  | monomer             | stable      |
| 3wvf   | 0.12                         | xtal  | monomer             | stable      |
| 3wvt   | 0.12                         | xtal  | monomer             | stable      |
| 3wx5   | 0.12                         | xtal  | monomer             | stable      |
| 3wzt   | 0.29                         | xtal  | monomer             | stable      |
| 3x0w   | 0.12                         | bio   | monomer             | stable      |
| 3zfm   | 0.12                         | xtal  | monomer             | stable      |
| 3zfy   | 0.12                         | xtal  | monomer             | stable      |
| 3zk0   | 0.22                         | xtal  | monomer             | stable      |
| 3zlh   | 0.80                         | bio   | octomer             | stable      |
| 3zm0   | 0.12                         | xtal  | monomer             | stable      |
| 3zm1   | 0.12                         | xtal  | monomer             | stable      |
| 3zm2   | 0.12                         | xtal  | monomer             | stable      |
| 3zm3   | 0.12                         | xtal  | monomer             | stable      |
| 3zny   | 0.12                         | xtal  | monomer             | stable      |
| 3zq3   | 0.26                         | xtal  | monomer             | stable      |
| 4bg0   | 0.12                         | xtal  | monomer             | stable      |
| 4bob   | 0.12                         | xtal  | monomer             | stable      |
| 4bod   | 0.12                         | xtal  | monomer             | stable      |
| 4bp8   | 0.64                         | bio   | dimer               | stable      |
| 4bpf   | 0.15                         | xtal  | monomer             | stable      |
| 4bpy   | 0.12                         | xtal  | monomer             | stable      |
| 4bxm   | 0.12                         | xtal  | monomer             | stable      |
| 4c41   | 0.12                         | bio   | monomer             | stable      |
| 4c5f   | 0.12                         | xtal  | monomer             | stable      |
| 4c6r   | 0.27                         | xtal  | monomer             | stable      |
| 4cbe   | 0.12                         | xtal  | monomer             | stable      |
| 4cbh   | 0.12                         | xtal  | monomer             | stable      |

|      |      |      |          |           |
|------|------|------|----------|-----------|
| 4cbi | 0.12 | xtal | monomer  | stable    |
| 4cbl | 0.20 | bio  | dimer    | stable    |
| 4cbm | 0.12 | bio  | dimer    | uncertain |
| 4cdo | 0.38 | xtal | monomer  | stable    |
| 4cfi | 0.12 | bio  | monomer  | stable    |
| 4ch7 | 0.12 | xtal | monomer  | stable    |
| 4chj | 0.83 | xtal | tetramer | uncertain |
| 4cil | 0.15 | xtal | monomer  | stable    |
| 4co7 | 0.12 | xtal | monomer  | stable    |
| 4cso | 0.19 | xtal | monomer  | stable    |
| 4cx8 | 0.12 | bio  | dimer    | stable    |
| 4cxi | 0.83 | bio  | dimer    | stable    |
| 4cye | 0.83 | bio  | dimer    | stable    |
| 4d2o | 0.12 | xtal | monomer  | stable    |
| 4d4q | 0.12 | xtal | monomer  | stable    |
| 4d5r | 0.81 | bio  | dimer    | stable    |
| 4d70 | 0.12 | xtal | monomer  | stable    |
| 4d7r | 0.12 | xtal | monomer  | stable    |
| 4h9w | 0.15 | xtal | monomer  | stable    |
| 4hic | 0.12 | xtal | monomer  | stable    |
| 4icu | 0.12 | xtal | monomer  | stable    |
| 4ino | 0.12 | xtal | monomer  | stable    |
| 4iqc | 0.13 | xtal | monomer  | stable    |
| 4irf | 0.40 | xtal | monomer  | stable    |
| 4it7 | 0.12 | xtal | monomer  | stable    |
| 4iyc | 0.12 | xtal | monomer  | stable    |
| 4ize | 0.29 | xtal | monomer  | stable    |
| 4izl | 0.12 | xtal | monomer  | stable    |
| 4j0o | 0.12 | xtal | monomer  | stable    |
| 4j1s | 0.16 | xtal | monomer  | stable    |
| 4j2r | 0.12 | xtal | monomer  | stable    |
| 4jkq | 0.12 | bio  | monomer  | stable    |
| 4jmp | 0.12 | xtal | monomer  | stable    |
| 4k1s | 0.12 | xtal | monomer  | stable    |
| 4k40 | 0.12 | xtal | monomer  | stable    |
| 4k51 | 0.12 | xtal | trimer   | stable    |
| 4k5q | 0.12 | xtal | monomer  | stable    |
| 4k82 | 0.12 | xtal | monomer  | stable    |
| 4k83 | 0.55 | xtal | monomer  | stable    |
| 4k9s | 0.12 | xtal | monomer  | stable    |
| 4kex | 0.12 | xtal | monomer  | stable    |
| 4kxo | 0.87 | bio  | dimer    | stable    |
| 4l1d | 0.43 | xtal | monomer  | stable    |
| 4l6u | 0.12 | xtal | monomer  | stable    |
| 4l8i | 0.12 | xtal | dimer    | stable    |
| 4l8l | 0.83 | bio  | dimer    | uncertain |
| 4l9h | 0.78 | bio  | monomer  | stable    |
| 4lcm | 0.12 | xtal | dimer    | stable    |
| 4lee | 0.12 | xtal | monomer  | stable    |
| 4lhf | 0.83 | bio  | monomer  | stable    |
| 4lk4 | 0.24 | bio  | monomer  | stable    |
| 4lpt | 0.56 | bio  | hexamer  | stable    |
| 4lrk | 0.83 | bio  | dimer    | stable    |

|      |      |      |          |           |
|------|------|------|----------|-----------|
| 4lso | 0.12 | bio  | monomer  | stable    |
| 4ltt | 0.12 | xtal | monomer  | stable    |
| 4lw5 | 0.13 | xtal | monomer  | stable    |
| 4lzi | 0.70 | xtal | monomer  | stable    |
| 4m64 | 0.12 | xtal | monomer  | stable    |
| 4m7g | 0.12 | bio  | monomer  | stable    |
| 4m80 | 0.12 | xtal | monomer  | stable    |
| 4m8g | 0.38 | xtal | monomer  | stable    |
| 4m90 | 0.12 | xtal | monomer  | stable    |
| 4m9p | 0.34 | xtal | monomer  | stable    |
| 4mc0 | 0.12 | xtal | monomer  | stable    |
| 4mck | 0.44 | xtal | monomer  | stable    |
| 4mee | 0.12 | xtal | monomer  | stable    |
| 4mel | 0.87 | bio  | dimer    | stable    |
| 4mem | 0.42 | bio  | dimer    | stable    |
| 4mfi | 0.38 | bio  | monomer  | stable    |
| 4mfj | 0.13 | xtal | monomer  | stable    |
| 4mgf | 0.45 | xtal | monomer  | stable    |
| 4mgs | 0.12 | xtal | monomer  | stable    |
| 4mhp | 0.12 | xtal | monomer  | stable    |
| 4mhr | 1.00 | bio  | dimer    | stable    |
| 4mq3 | 0.12 | bio  | monomer  | stable    |
| 4mt5 | 0.24 | xtal | monomer  | stable    |
| 4mt6 | 0.12 | xtal | monomer  | stable    |
| 4mt7 | 0.12 | xtal | monomer  | stable    |
| 4mzd | 0.12 | xtal | monomer  | stable    |
| 4n08 | 0.12 | xtal | monomer  | stable    |
| 4n1l | 0.24 | xtal | monomer  | stable    |
| 4n3x | 0.82 | xtal | tetramer | stable    |
| 4n40 | 0.12 | xtal | trimer   | stable    |
| 4n4a | 0.19 | bio  | dimer    | stable    |
| 4n5a | 0.12 | xtal | monomer  | stable    |
| 4n5c | 0.12 | xtal | monomer  | stable    |
| 4n5q | 0.15 | xtal | monomer  | stable    |
| 4n6l | 0.20 | xtal | monomer  | stable    |
| 4n6t | 0.12 | xtal | monomer  | stable    |
| 4n6u | 0.12 | xtal | monomer  | stable    |
| 4n75 | 0.12 | xtal | monomer  | stable    |
| 4n7f | 0.83 | xtal | dimer    | stable    |
| 4n8h | 0.53 | bio  | monomer  | stable    |
| 4n8k | 0.58 | bio  | monomer  | stable    |
| 4n8l | 0.48 | bio  | monomer  | stable    |
| 4nbo | 0.53 | xtal | monomer  | stable    |
| 4nc9 | 0.43 | bio  | dimer    | stable    |
| 4nci | 0.65 | xtal | monomer  | stable    |
| 4ndl | 0.12 | xtal | monomer  | stable    |
| 4nfb | 0.12 | xtal | monomer  | stable    |
| 4nfc | 0.50 | xtal | monomer  | stable    |
| 4nfx | 1.00 | bio  | dimer    | stable    |
| 4ng0 | 1.00 | xtal | monomer  | stable    |
| 4nj6 | 0.67 | bio  | dimer    | uncertain |
| 4nj7 | 0.12 | xtal | monomer  | stable    |
| 4nj8 | 0.12 | xtal | monomer  | stable    |



|      |      |      |         |           |
|------|------|------|---------|-----------|
| 4njc | 1.00 | xtal | monomer | stable    |
| 4nk6 | 0.34 | bio  | dimer   | stable    |
| 4nk8 | 0.77 | bio  | dimer   | stable    |
| 4nl7 | 0.12 | xtal | dimer   | stable    |
| 4nlb | 0.12 | xtal | monomer | stable    |
| 4nng | 0.12 | xtal | monomer | stable    |
| 4nnh | 0.27 | xtal | monomer | stable    |
| 4nnk | 0.12 | xtal | monomer | stable    |
| 4noj | 0.12 | xtal | monomer | stable    |
| 4npf | 0.86 | bio  | dimer   | uncertain |
| 4nq0 | 0.12 | xtal | monomer | stable    |
| 4nsp | 0.12 | xtal | monomer | stable    |
| 4nu2 | 0.12 | xtal | monomer | stable    |
| 4nv8 | 0.74 | xtal | dimer   | stable    |
| 4nx9 | 0.68 | bio  | monomer | stable    |
| 4nzz | 0.12 | xtal | monomer | stable    |
| 4o2x | 0.32 | xtal | monomer | stable    |
| 4o3x | 0.12 | xtal | monomer | stable    |
| 4o4c | 0.41 | xtal | monomer | stable    |
| 4o5p | 0.12 | xtal | monomer | stable    |
| 4o5s | 0.12 | xtal | monomer | stable    |
| 4o6g | 0.13 | xtal | monomer | stable    |
| 4o6k | 0.20 | xtal | monomer | stable    |
| 4o6x | 0.83 | xtal | dimer   | uncertain |
| 4o7q | 0.12 | xtal | monomer | stable    |
| 4o8s | 0.13 | xtal | monomer | stable    |
| 4o8v | 0.12 | xtal | monomer | stable    |
| 4o9f | 0.12 | xtal | monomer | stable    |
| 4o9l | 0.19 | xtal | monomer | stable    |
| 4oa6 | 0.12 | xtal | monomer | stable    |
| 4ob4 | 0.70 | bio  | dimer   | stable    |
| 4od4 | 0.12 | xtal | dimer   | stable    |
| 4od6 | 0.12 | xtal | monomer | stable    |
| 4odd | 0.76 | xtal | monomer | stable    |
| 4of0 | 0.12 | xtal | monomer | stable    |
| 4of5 | 0.12 | bio  | monomer | stable    |
| 4ofv | 0.12 | bio  | monomer | stable    |
| 4ohd | 0.12 | xtal | monomer | stable    |
| 4ohe | 0.12 | xtal | monomer | stable    |
| 4ohh | 0.12 | xtal | monomer | stable    |
| 4ohi | 0.12 | xtal | monomer | stable    |
| 4ohl | 0.12 | xtal | monomer | stable    |
| 4ohr | 1.00 | bio  | dimer   | stable    |
| 4oj0 | 0.83 | xtal | dimer   | stable    |
| 4ok0 | 0.12 | xtal | monomer | stable    |
| 4om9 | 0.12 | xtal | monomer | stable    |
| 4oq1 | 0.12 | xtal | monomer | stable    |
| 4oqw | 1.00 | bio  | dimer   | stable    |
| 4orw | 0.12 | xtal | monomer | stable    |
| 4os0 | 1.00 | xtal | dimer   | stable    |
| 4os3 | 1.00 | xtal | dimer   | stable    |
| 4os8 | 1.00 | xtal | dimer   | stable    |
| 4otd | 0.12 | xtal | monomer | stable    |

|      |      |      |          |           |
|------|------|------|----------|-----------|
| 4ou0 | 0.22 | xtal | monomer  | stable    |
| 4ow6 | 0.12 | xtal | monomer  | stable    |
| 4oyl | 0.12 | xtal | trimer   | uncertain |
| 4oyy | 0.12 | xtal | trimer   | stable    |
| 4ozk | 0.12 | xtal | monomer  | stable    |
| 4p09 | 0.12 | xtal | monomer  | stable    |
| 4p0f | 0.36 | xtal | dimer    | stable    |
| 4p0j | 0.63 | xtal | monomer  | stable    |
| 4p0k | 0.79 | xtal | monomer  | stable    |
| 4p0l | 0.20 | xtal | monomer  | stable    |
| 4p0m | 0.19 | xtal | hexamer  | stable    |
| 4p0o | 0.41 | xtal | monomer  | stable    |
| 4p0y | 0.12 | xtal | monomer  | stable    |
| 4p0z | 0.12 | xtal | monomer  | stable    |
| 4p17 | 0.13 | xtal | monomer  | stable    |
| 4p39 | 0.40 | bio  | tetramer | stable    |
| 4p47 | 0.12 | xtal | monomer  | stable    |
| 4p48 | 0.12 | xtal | monomer  | stable    |
| 4p5u | 0.12 | xtal | monomer  | stable    |
| 4p7o | 0.16 | xtal | dimer    | stable    |
| 4pa1 | 0.67 | xtal | dimer    | stable    |
| 4pbd | 0.58 | xtal | monomer  | stable    |
| 4pcf | 0.12 | bio  | trimer   | uncertain |
| 4pd3 | 0.23 | bio  | monomer  | stable    |
| 4pej | 0.60 | bio  | dimer    | stable    |
| 4pek | 0.12 | bio  | monomer  | stable    |
| 4pgr | 0.12 | xtal | monomer  | stable    |
| 4pgs | 0.12 | xtal | dimer    | stable    |
| 4pgu | 0.15 | xtal | monomer  | stable    |
| 4pgv | 0.13 | xtal | monomer  | stable    |
| 4ph1 | 0.73 | xtal | trimer   | stable    |
| 4pjq | 0.20 | bio  | dimer    | stable    |
| 4pk1 | 0.12 | xtal | monomer  | stable    |
| 4pk9 | 0.78 | bio  | dimer    | stable    |
| 4pka | 0.81 | bio  | dimer    | stable    |
| 4pkx | 0.12 | xtal | monomer  | stable    |
| 4pmh | 0.12 | xtal | monomer  | stable    |
| 4pn7 | 0.12 | bio  | monomer  | stable    |
| 4po4 | 0.12 | xtal | monomer  | stable    |
| 4poy | 0.12 | xtal | monomer  | stable    |
| 4ppj | 0.12 | bio  | monomer  | stable    |
| 4ppk | 0.12 | bio  | monomer  | stable    |
| 4ppl | 0.12 | xtal | monomer  | stable    |
| 4pqo | 0.12 | xtal | monomer  | stable    |
| 4pqz | 0.12 | xtal | dimer    | uncertain |
| 4psd | 0.12 | xtal | monomer  | stable    |
| 4psf | 0.23 | bio  | monomer  | stable    |
| 4pug | 0.12 | bio  | dimer    | stable    |
| 4pui | 0.12 | xtal | monomer  | stable    |
| 4pwq | 0.13 | xtal | dimer    | uncertain |
| 4pzp | 0.12 | xtal | monomer  | stable    |
| 4q2s | 0.12 | xtal | monomer  | stable    |
| 4q2y | 0.23 | xtal | monomer  | stable    |

|      |      |      |          |           |
|------|------|------|----------|-----------|
| 4q3h | 0.85 | xtal | monomer  | stable    |
| 4q4g | 0.12 | xtal | monomer  | stable    |
| 4q4n | 0.12 | xtal | monomer  | stable    |
| 4q5y | 0.23 | xtal | dimer    | stable    |
| 4q65 | 0.12 | xtal | monomer  | stable    |
| 4q6l | 0.12 | xtal | monomer  | stable    |
| 4q6v | 0.12 | xtal | monomer  | stable    |
| 4q6z | 0.12 | xtal | dimer    | uncertain |
| 4q7k | 0.12 | xtal | monomer  | stable    |
| 4q7m | 0.84 | bio  | dimer    | stable    |
| 4q7t | 0.12 | xtal | monomer  | stable    |
| 4q9h | 0.12 | xtal | monomer  | stable    |
| 4q9p | 0.68 | xtal | tetramer | uncertain |
| 4qaj | 0.60 | xtal | monomer  | stable    |
| 4qaz | 0.13 | xtal | monomer  | stable    |
| 4qb0 | 0.12 | xtal | monomer  | stable    |
| 4qbe | 0.43 | xtal | monomer  | stable    |
| 4qcj | 0.31 | bio  | monomer  | stable    |
| 4qdr | 0.12 | xtal | monomer  | stable    |
| 4qdt | 0.12 | xtal | monomer  | stable    |
| 4qdu | 0.12 | xtal | monomer  | stable    |
| 4qgy | 0.12 | bio  | monomer  | stable    |
| 4qlo | 0.80 | bio  | dimer    | stable    |
| 4qlr | 0.15 | xtal | monomer  | stable    |
| 4qmd | 0.12 | xtal | monomer  | stable    |
| 4qmi | 0.12 | xtal | monomer  | stable    |
| 4qmj | 0.12 | xtal | monomer  | stable    |
| 4qs8 | 0.12 | xtal | monomer  | stable    |
| 4qt4 | 0.12 | xtal | monomer  | stable    |
| 4qtz | 0.12 | xtal | monomer  | stable    |
| 4quc | 0.12 | xtal | monomer  | stable    |
| 4quk | 0.12 | xtal | monomer  | stable    |
| 4qx0 | 0.28 | xtal | monomer  | stable    |
| 4qx1 | 0.20 | xtal | monomer  | stable    |
| 4qx2 | 0.27 | xtal | monomer  | stable    |
| 4qx3 | 0.24 | xtal | monomer  | stable    |
| 4qxl | 0.12 | xtal | monomer  | stable    |
| 4r05 | 0.12 | xtal | monomer  | stable    |
| 4r0e | 0.48 | xtal | monomer  | stable    |
| 4r0x | 0.12 | xtal | dimer    | stable    |
| 4r0y | 0.12 | xtal | monomer  | stable    |
| 4r19 | 0.12 | xtal | monomer  | stable    |
| 4r1a | 0.12 | xtal | monomer  | stable    |
| 4r1b | 0.12 | xtal | monomer  | stable    |
| 4r1c | 0.12 | xtal | monomer  | stable    |
| 4r58 | 0.12 | xtal | monomer  | stable    |
| 4r61 | 0.49 | xtal | monomer  | stable    |
| 4r6f | 0.12 | xtal | monomer  | stable    |
| 4r7v | 0.18 | bio  | dimer    | stable    |
| 4r8r | 0.12 | xtal | monomer  | stable    |
| 4rcw | 0.40 | bio  | dimer    | uncertain |
| 4rdp | 0.82 | bio  | monomer  | stable    |
| 4reh | 0.12 | xtal | monomer  | stable    |

|      |      |      |          |        |
|------|------|------|----------|--------|
| 4rej | 0.12 | xtal | monomer  | stable |
| 4rf6 | 0.12 | xtal | monomer  | stable |
| 4rid | 0.18 | bio  | tetramer | stable |
| 4rl1 | 0.12 | xtal | monomer  | stable |
| 4rl9 | 0.12 | xtal | tetramer | stable |
| 4rlb | 0.12 | bio  | tetramer | stable |
| 4rlm | 0.12 | xtal | monomer  | stable |
| 4rln | 0.12 | bio  | monomer  | stable |
| 4ro1 | 0.12 | xtal | monomer  | stable |
| 4roa | 0.45 | xtal | monomer  | stable |
| 4rs6 | 0.82 | bio  | hexamer  | stable |
| 4rsq | 0.46 | xtal | monomer  | stable |
| 4rsx | 0.12 | xtal | monomer  | stable |
| 4rtd | 0.13 | xtal | monomer  | stable |
| 4rth | 0.49 | xtal | monomer  | stable |
| 4rwi | 0.66 | xtal | dimer    | stable |
| 4rwq | 0.12 | xtal | monomer  | stable |
| 4rwr | 0.78 | xtal | monomer  | stable |
| 4rwu | 0.60 | xtal | monomer  | stable |
| 4rwz | 0.79 | xtal | monomer  | stable |
| 4ry4 | 0.12 | xtal | monomer  | stable |
| 4ry6 | 0.12 | xtal | monomer  | stable |
| 4ry7 | 0.12 | xtal | monomer  | stable |
| 4rz2 | 0.12 | xtal | monomer  | stable |
| 4s11 | 0.12 | xtal | monomer  | stable |
| 4s3l | 0.15 | xtal | monomer  | stable |
| 4s3p | 0.60 | xtal | tetramer | stable |
| 4tks | 0.58 | bio  | monomer  | stable |
| 4tlp | 0.12 | xtal | monomer  | stable |
| 4tlw | 0.12 | xtal | monomer  | stable |
| 4tn9 | 0.12 | xtal | monomer  | stable |
| 4tnm | 0.12 | xtal | monomer  | stable |
| 4tql | 0.12 | xtal | monomer  | stable |
| 4tr5 | 1.00 | bio  | monomer  | stable |
| 4trk | 0.12 | xtal | monomer  | stable |
| 4tse | 0.44 | xtal | dimer    | stable |
| 4ttl | 0.12 | xtal | nopred   | n/a    |
| 4ttp | 0.12 | xtal | monomer  | stable |
| 4tum | 0.27 | xtal | monomer  | stable |
| 4tut | 0.80 | xtal | monomer  | stable |
| 4tuu | 0.12 | xtal | monomer  | stable |
| 4tve | 0.15 | xtal | monomer  | stable |
| 4tx2 | 0.12 | xtal | monomer  | stable |
| 4txp | 0.12 | xtal | monomer  | stable |
| 4tza | 0.24 | xtal | monomer  | stable |
| 4tzg | 0.80 | xtal | monomer  | stable |
| 4tzi | 0.12 | xtal | monomer  | stable |
| 4tzj | 0.12 | xtal | monomer  | stable |
| 4u0l | 0.12 | xtal | monomer  | stable |
| 4u1d | 0.16 | xtal | monomer  | stable |
| 4u2m | 0.34 | xtal | tetramer | stable |
| 4u2n | 1.00 | xtal | dimer    | stable |
| 4u3a | 0.92 | bio  | dimer    | stable |

|      |      |  |      |          |           |
|------|------|--|------|----------|-----------|
| 4u3h | 0.12 |  | xtal | monomer  | stable    |
| 4u3t | 0.15 |  | xtal | monomer  | stable    |
| 4u3v | 0.12 |  | xtal | monomer  | stable    |
| 4u48 | 0.39 |  | bio  | monomer  | stable    |
| 4u4h | 0.13 |  | bio  | dimer    | stable    |
| 4u4j | 0.42 |  | bio  | monomer  | stable    |
| 4u59 | 0.42 |  | bio  | monomer  | stable    |
| 4u5a | 0.12 |  | xtal | monomer  | stable    |
| 4u9q | 0.46 |  | xtal | dimer    | uncertain |
| 4ud5 | 0.12 |  | xtal | dimer    | stable    |
| 4uex | 0.12 |  | bio  | monomer  | stable    |
| 4ulw | 0.83 |  | xtal | monomer  | stable    |
| 4umg | 0.24 |  | bio  | dimer    | uncertain |
| 4ums | 0.20 |  | xtal | monomer  | stable    |
| 4uos | 0.40 |  | xtal | monomer  | stable    |
| 4uts | 0.12 |  | xtal | monomer  | stable    |
| 4uu4 | 0.34 |  | bio  | monomer  | stable    |
| 4uv2 | 0.76 |  | bio  | 16-mer   | stable    |
| 4uv6 | 0.74 |  | xtal | monomer  | stable    |
| 4uvk | 0.12 |  | xtal | monomer  | stable    |
| 4uw2 | 0.12 |  | xtal | monomer  | stable    |
| 4uww | 1.00 |  | xtal | monomer  | stable    |
| 4uy3 | 0.12 |  | xtal | monomer  | stable    |
| 4uz2 | 0.19 |  | xtal | octomer  | stable    |
| 4v0t | 0.83 |  | bio  | dimer    | stable    |
| 4v14 | 0.12 |  | xtal | monomer  | stable    |
| 4v16 | 0.12 |  | xtal | monomer  | stable    |
| 4v2b | 0.12 |  | xtal | monomer  | stable    |
| 4v2d | 0.12 |  | xtal | monomer  | stable    |
| 4v2e | 0.12 |  | bio  | monomer  | stable    |
| 4v2u | 0.12 |  | xtal | monomer  | stable    |
| 4v38 | 0.12 |  | xtal | monomer  | stable    |
| 4v39 | 0.12 |  | xtal | monomer  | stable    |
| 4w4m | 0.12 |  | bio  | monomer  | stable    |
| 4w5x | 0.35 |  | xtal | dimer    | stable    |
| 4w60 | 0.54 |  | xtal | dimer    | stable    |
| 4w6v | 0.12 |  | xtal | monomer  | stable    |
| 4w7g | 0.12 |  | xtal | monomer  | stable    |
| 4w8v | 1.00 |  | bio  | tetramer | stable    |
| 4w8w | 0.82 |  | bio  | monomer  | stable    |
| 4w8z | 0.83 |  | bio  | dimer    | stable    |
| 4wau | 0.33 |  | xtal | dimer    | uncertain |
| 4wbz | 0.40 |  | xtal | monomer  | stable    |
| 4wdc | 0.12 |  | xtal | monomer  | stable    |
| 4we2 | 0.12 |  | xtal | monomer  | stable    |
| 4wfi | 0.12 |  | xtal | monomer  | stable    |
| 4wj1 | 0.50 |  | bio  | dimer    | stable    |
| 4wj2 | 0.12 |  | bio  | monomer  | stable    |
| 4wjs | 0.12 |  | xtal | monomer  | stable    |
| 4wmg | 0.12 |  | bio  | monomer  | stable    |
| 4wo8 | 0.12 |  | xtal | monomer  | stable    |
| 4woy | 0.59 |  | bio  | tetramer | stable    |
| 4wp6 | 0.12 |  | xtal | monomer  | stable    |

|      |      |      |          |           |
|------|------|------|----------|-----------|
| 4wt3 | 0.12 | xtal | monomer  | stable    |
| 4wtx | 0.16 | xtal | monomer  | stable    |
| 4wu0 | 0.27 | xtal | monomer  | stable    |
| 4wz0 | 0.62 | xtal | dimer    | stable    |
| 4x0j | 0.12 | xtal | monomer  | stable    |
| 4x2m | 0.12 | xtal | monomer  | stable    |
| 4x2w | 0.59 | bio  | tetramer | stable    |
| 4x2x | 0.18 | bio  | monomer  | stable    |
| 4x2y | 0.54 | xtal | monomer  | stable    |
| 4x3x | 0.12 | xtal | dimer    | stable    |
| 4x43 | 0.12 | bio  | monomer  | uncertain |
| 4x8h | 0.20 | bio  | monomer  | stable    |
| 4x8m | 0.12 | xtal | monomer  | stable    |
| 4x9u | 0.12 | xtal | monomer  | stable    |
| 4xah | 1.00 | xtal | monomer  | stable    |
| 4xeh | 0.52 | bio  | dimer    | stable    |
| 4xfu | 0.12 | xtal | dimer    | stable    |
| 4xfv | 0.12 | xtal | dimer    | uncertain |
| 4xh3 | 0.12 | bio  | dimer    | uncertain |
| 4xhm | 0.16 | xtal | monomer  | stable    |
| 4xkk | 0.13 | xtal | monomer  | stable    |
| 4xm4 | 0.76 | bio  | dimer    | stable    |
| 4xp8 | 0.34 | xtal | monomer  | stable    |
| 4xpk | 0.12 | xtal | monomer  | stable    |
| 4xq7 | 0.12 | xtal | monomer  | stable    |
| 4xy3 | 0.12 | xtal | monomer  | stable    |
| 4xzg | 0.12 | xtal | monomer  | stable    |
| 4y21 | 0.46 | bio  | monomer  | stable    |
| 4y4q | 0.24 | xtal | dimer    | stable    |
| 4y5j | 0.33 | bio  | dimer    | stable    |
| 4yeq | 0.34 | xtal | monomer  | stable    |
| 4yf2 | 0.12 | xtal | monomer  | stable    |
| 4yfe | 0.12 | xtal | monomer  | stable    |
| 4yfs | 0.12 | xtal | monomer  | stable    |
| 4yhe | 0.12 | xtal | monomer  | stable    |
| 4ykc | 0.40 | xtal | tetramer | stable    |
| 4ykd | 0.12 | xtal | monomer  | stable    |
| 4yno | 0.12 | xtal | monomer  | stable    |
| 4ynv | 0.92 | xtal | monomer  | stable    |
| 4ynw | 1.00 | bio  | dimer    | stable    |
| 4ypj | 0.12 | xtal | monomer  | stable    |
| 4yuo | 0.12 | xtal | monomer  | stable    |
| 4yvm | 0.38 | xtal | dimer    | stable    |
| 4yvo | 0.12 | xtal | monomer  | stable    |
| 4z29 | 0.47 | xtal | monomer  | stable    |
| 4z99 | 0.12 | xtal | monomer  | stable    |
| 4z9p | 0.72 | xtal | monomer  | stable    |
| 4zf3 | 0.32 | xtal | monomer  | stable    |
| 4zf4 | 0.40 | xtal | monomer  | stable    |
| 4zf5 | 0.54 | xtal | monomer  | stable    |
| 4zg1 | 0.12 | xtal | hexamer  | uncertain |
| 4zj2 | 0.12 | xtal | monomer  | stable    |
| 4zj3 | 0.12 | xtal | monomer  | stable    |

|      |      |      |          |           |
|------|------|------|----------|-----------|
| 4zmd | 0.12 | xtal | monomer  | stable    |
| 4zot | 0.12 | xtal | monomer  | stable    |
| 4zov | 0.84 | xtal | dimer    | uncertain |
| 4zoy | 0.12 | xtal | monomer  | stable    |
| 4zuz | 0.19 | xtal | monomer  | stable    |
| 4zwj | 0.12 | xtal | monomer  | stable    |
| 5a0g | 0.12 | xtal | monomer  | stable    |
| 5a0z | 0.54 | bio  | tetramer | stable    |
| 5aem | 0.18 | xtal | monomer  | stable    |
| 5af5 | 0.12 | xtal | monomer  | stable    |
| 5aio | 0.81 | xtal | monomer  | stable    |
| 5aj8 | 0.12 | xtal | monomer  | stable    |
| 5avg | 0.29 | xtal | monomer  | stable    |
| 5avh | 0.79 | bio  | tetramer | stable    |
| 5brl | 0.19 | xtal | monomer  | stable    |
| 5bth | 0.28 | bio  | monomer  | stable    |
| 5bvq | 0.16 | xtal | monomer  | stable    |
| 5c00 | 0.83 | bio  | monomer  | stable    |
| 5c86 | 0.12 | xtal | monomer  | stable    |

<sup>a</sup> yellow: incorrect classification

<sup>b</sup> Criteria for test selection are given in Table S9

**Table S12.** Interface area, number of near-native structures, and inferred probability of being a biological dimer for the proteins in the “difficult” subset of the test set<sup>a</sup>

| Biological dimers |                                  |                 |                     | Crystallographic dimers |                                  |                 |                     |
|-------------------|----------------------------------|-----------------|---------------------|-------------------------|----------------------------------|-----------------|---------------------|
| PDB ID            | Interface area (Å <sup>2</sup> ) | N <sub>nn</sub> | Probability (dimer) | PDB ID                  | Interface area (Å <sup>2</sup> ) | N <sub>nn</sub> | Probability (dimer) |
| 3w66              | 529.6                            | 0               | 0.05                | 3w9g                    | 604.3                            | 8               | 0.17                |
| 3w8g              | 760.8                            | 183             | 0.91                | 3wea                    | 445.6                            | 0               | 0.05                |
| 3wtz              | 690.6                            | 74              | 0.75                | 3wp9                    | 716.5                            | 23              | 0.36                |
| 3wx4              | 1220.4                           | 159             | 0.89                | 3wpj                    | 566.9                            | 0               | 0.05                |
| 3wyd              | 542.7                            | 68              | 0.73                | 4c41                    | 620.9                            | 0               | 0.05                |
| 4chk              | 743.5                            | 49              | 0.61                | 4cbm                    | 1180.1                           | 0               | 0.05                |
| 4ckn              | 1371.7                           | 82              | 0.79                | 4cfi                    | 628.2                            | 0               | 0.05                |
| 4cop              | 489.0                            | 131             | 0.87                | 4chj                    | 930.5                            | 144             | 0.88                |
| 4cw9              | 635.1                            | 0               | 0.05                | 4d5r                    | 790.3                            | 109             | 0.85                |
| 4cwc              | 1505.3                           | 52              | 0.63                | 4k51                    | 874.1                            | 0               | 0.05                |
| 4d28              | 1404.9                           | 34              | 0.48                | 4l8i                    | 827.8                            | 0               | 0.05                |
| 4jgm              | 698.2                            | 0               | 0.05                | 4l9h                    | 1109.1                           | 85              | 0.80                |
| 4jup              | 389.5                            | 20              | 0.33                | 4lcm                    | 814.0                            | 0               | 0.05                |
| 4ke2              | 1787.5                           | 4               | 0.11                | 4lhf                    | 1034.8                           | 148             | 0.88                |
| 4km3              | 1157.9                           | 125             | 0.87                | 4lk4                    | 595.0                            | 9               | 0.18                |
| 4kp2              | 1756.8                           | 41              | 0.54                | 4lso                    | 524.0                            | 0               | 0.05                |
| 4l2w              | 1072.2                           | 47              | 0.59                | 4m7g                    | 499.9                            | 0               | 0.05                |
| 4lft              | 517.9                            | 0               | 0.05                | 4mfi                    | 957.9                            | 20              | 0.33                |
| 4m0q              | 1449.4                           | 83              | 0.79                | 4n3x                    | 940.2                            | 122             | 0.87                |
| 4m23              | 1547.5                           | 86              | 0.80                | 4n40                    | 654.7                            | 0               | 0.05                |
| 4mdu              | 943.7                            | 5               | 0.12                | 4n7f                    | 626.1                            | 142             | 0.88                |
| 4nj0              | 882.7                            | 229             | 1.00                | 4n8h                    | 1844.3                           | 36              | 0.50                |
| 4nqf              | 1203.6                           | 32              | 0.46                | 4nl7                    | 1254.8                           | 0               | 0.05                |
| 4nsr              | 1126.8                           | 138             | 0.88                | 4npf                    | 1404.4                           | 182             | 0.91                |
| 4ny0              | 735.5                            | 0               | 0.05                | 4nv8                    | 837.6                            | 73              | 0.75                |
| 4o2h              | 919.3                            | 20              | 0.33                | 4nx9                    | 1116.7                           | 58              | 0.67                |
| 4oaf              | 1130.5                           | 28              | 0.42                | 4o6x                    | 616.0                            | 151             | 0.88                |
| 4oky              | 811.4                            | 26              | 0.40                | 4od4                    | 650.6                            | 0               | 0.05                |
| 4p08              | 1192.2                           | 39              | 0.53                | 4of5                    | 565.9                            | 0               | 0.05                |
| 4p12              | 1514.5                           | 37              | 0.51                | 4oj0                    | 1524.5                           | 139             | 0.88                |
| 4p6l              | 535.0                            | 1               | 0.06                | 4os0                    | 1024.8                           | 452             | 1.00                |
| 4pu7              | 1034.3                           | 282             | 1.00                | 4oyl                    | 381.5                            | 0               | 0.05                |
| 4pus              | 653.0                            | 0               | 0.05                | 4oyy                    | 539.1                            | 0               | 0.05                |
| 4q9b              | 727.8                            | 140             | 0.88                | 4p0f                    | 1184.7                           | 19              | 0.32                |
| 4r27              | 890.3                            | 0               | 0.05                | 4p0m                    | 844.4                            | 5               | 0.12                |
| 4ra8              | 670.7                            | 2               | 0.08                | 4p39                    | 783.3                            | 22              | 0.35                |
| 4rd9              | 1799.3                           | 77              | 0.77                | 4p7o                    | 1213.8                           | 3               | 0.09                |
| 4rdj              | 1762.0                           | 90              | 0.81                | 4pa1                    | 1179.0                           | 57              | 0.66                |
| 4ryj              | 476.7                            | 0               | 0.05                | 4pcf                    | 657.7                            | 0               | 0.05                |
| 4s03              | 851.7                            | 49              | 0.61                | 4pek                    | 665.9                            | 0               | 0.05                |
| 4u3q              | 651.0                            | 0               | 0.05                | 4pgs                    | 644.6                            | 0               | 0.05                |
| 4u4i              | 925.8                            | 11              | 0.21                | 4pn7                    | 702.5                            | 0               | 0.05                |
| 4u5h              | 590.7                            | 11              | 0.21                | 4ppj                    | 977.6                            | 0               | 0.05                |



|      |        |     |      |      |        |    |      |
|------|--------|-----|------|------|--------|----|------|
| 4u64 | 1516.7 | 129 | 0.87 | 4pqz | 377.1  | 0  | 0.05 |
| 4uvj | 1053.6 | 13  | 0.24 | 4psf | 595.2  | 8  | 0.17 |
| 4v1p | 637.6  | 187 | 0.91 | 4pug | 826.8  | 0  | 0.05 |
| 4w6g | 903.5  | 138 | 0.88 | 4pwq | 802.1  | 1  | 0.06 |
| 4w6k | 770.7  | 78  | 0.77 | 4q5y | 1028.2 | 8  | 0.17 |
| 4wnz | 1286.8 | 53  | 0.64 | 4q6z | 625.4  | 0  | 0.05 |
| 4xoh | 1083.9 | 6   | 0.14 | 4q9p | 775.3  | 58 | 0.67 |
| 4zqa | 1794.3 | 58  | 0.67 | 4qcj | 472.0  | 14 | 0.25 |
| 5a2n | 1096.1 | 0   | 0.05 | 4qgy | 573.2  | 0  | 0.05 |
| 5a48 | 778.2  | 1   | 0.06 | 4r7v | 757.5  | 4  | 0.11 |

|      |        |     |      |
|------|--------|-----|------|
| 4rdp | 1381.7 | 111 | 0.85 |
| 4rid | 1471.5 | 4   | 0.11 |
| 4rl9 | 506.7  | 0   | 0.05 |
| 4rln | 568.5  | 0   | 0.05 |
| 4rs6 | 869.0  | 122 | 0.87 |
| 4rwi | 1184.5 | 55  | 0.65 |
| 4tks | 1025.6 | 43  | 0.56 |
| 4tr5 | 1340.3 | 222 | 1.00 |
| 4tse | 1057.9 | 26  | 0.40 |
| 4u2n | 698.3  | 224 | 1.00 |
| 4u48 | 4122.1 | 21  | 0.34 |
| 4u9q | 724.9  | 28  | 0.42 |
| 4ud5 | 886.9  | 0   | 0.05 |
| 4uex | 709.7  | 0   | 0.05 |
| 4uu4 | 881.4  | 17  | 0.29 |
| 4uz2 | 739.0  | 5   | 0.12 |
| 4w5x | 437.2  | 18  | 0.30 |
| 4w60 | 399.3  | 37  | 0.51 |
| 4w8w | 1381.4 | 116 | 0.86 |
| 4wau | 818.2  | 16  | 0.28 |
| 4wj2 | 595.3  | 0   | 0.05 |
| 4wmg | 599.5  | 0   | 0.05 |
| 4woy | 1029.5 | 44  | 0.57 |
| 4wz0 | 701.2  | 48  | 0.60 |
| 4x2w | 1095.6 | 44  | 0.57 |
| 4x43 | 643.0  | 0   | 0.05 |
| 4x8h | 974.2  | 6   | 0.14 |
| 4ynw | 651.0  | 246 | 1.00 |
| 5bth | 695.4  | 12  | 0.22 |
| 5c00 | 915.8  | 149 | 0.88 |

|         |       |      |      |         |       |      |      |
|---------|-------|------|------|---------|-------|------|------|
| Average | 994.3 | 67.2 | 0.52 | Average | 934.1 | 47.1 | 0.40 |
| Std Dev | 391.7 | 81.5 | 0.31 | Std Dev | 618.9 | 75.5 | 0.30 |

<sup>a</sup> Subset of the test set in Table S9, containing only proteins' results from EPPIC and PISA are conflicting, thus one considers the dimer biological the other crystallographic, or the classification by PISA is uncertain.

**Table S13.** Classification of difficult set dimers by three methods<sup>a,b</sup>

| PDB ID | ClusPro probability of dimer | EPPIC | PISA multimer class | PISA status |
|--------|------------------------------|-------|---------------------|-------------|
| 3w66   | 0.12                         | xtal  | dimer               | uncertain   |
| 3w8g   | 0.87                         | xtal  | dimer               | stable      |
| 3wtz   | 0.74                         | xtal  | dimer               | stable      |
| 3wx4   | 0.84                         | xtal  | dimer               | stable      |
| 3wyd   | 0.72                         | xtal  | dimer               | stable      |
| 4chk   | 0.62                         | bio   | monomer             | stable      |
| 4ckn   | 0.77                         | xtal  | dimer               | stable      |
| 4cop   | 0.83                         | xtal  | dimer               | uncertain   |
| 4cw9   | 0.12                         | xtal  | dimer               | stable      |
| 4cwc   | 0.64                         | bio   | tetramer            | stable      |
| 4d28   | 0.51                         | xtal  | dimer               | stable      |
| 4jgm   | 0.12                         | bio   | dimer               | uncertain   |
| 4jup   | 0.38                         | xtal  | dimer               | uncertain   |
| 4ke2   | 0.18                         | xtal  | hexamer             | stable      |
| 4km3   | 0.83                         | xtal  | dimer               | stable      |
| 4kp2   | 0.57                         | bio   | dimer               | stable      |
| 4l2w   | 0.61                         | xtal  | tetramer            | stable      |
| 4lft   | 0.12                         | bio   | monomer             | stable      |
| 4m0q   | 0.77                         | xtal  | dimer               | stable      |
| 4m23   | 0.78                         | bio   | dimer               | stable      |
| 4mdu   | 0.19                         | xtal  | dimer               | stable      |
| 4nj0   | 1.00                         | xtal  | dimer               | stable      |
| 4nqf   | 0.49                         | xtal  | dimer               | stable      |
| 4nsr   | 0.83                         | xtal  | dimer               | stable      |
| 4ny0   | 0.12                         | xtal  | dimer               | stable      |
| 4o2h   | 0.38                         | xtal  | dimer               | stable      |
| 4oaf   | 0.46                         | bio   | monomer             | stable      |
| 4oky   | 0.44                         | xtal  | dimer               | stable      |
| 4p08   | 0.55                         | xtal  | dimer               | stable      |
| 4p12   | 0.54                         | bio   | dimer               | stable      |
| 4p6l   | 0.13                         | xtal  | dimer               | stable      |
| 4pu7   | 1.00                         | xtal  | dimer               | stable      |
| 4pus   | 0.12                         | xtal  | dimer               | uncertain   |
| 4q9b   | 0.83                         | xtal  | dimer               | stable      |
| 4r27   | 0.12                         | bio   | monomer             | stable      |
| 4ra8   | 0.15                         | xtal  | dimer               | stable      |
| 4rd9   | 0.75                         | bio   | dimer               | stable      |
| 4rdj   | 0.79                         | xtal  | dimer               | stable      |
| 4ryj   | 0.12                         | xtal  | dimer               | stable      |
| 4s03   | 0.62                         | xtal  | dimer               | uncertain   |
| 4to7   | 1.00                         | xtal  | monomer             | stable      |
| 4tqj   | 1.00                         | xtal  | monomer             | stable      |

|      |      |      |         |           |
|------|------|------|---------|-----------|
| 4u3q | 0.12 | xtal | dimer   | uncertain |
| 4u4i | 0.27 | bio  | monomer | stable    |
| 4u5h | 0.27 | xtal | dimer   | stable    |
| 4u64 | 0.83 | xtal | dimer   | stable    |
| 4uvj | 0.29 | xtal | dimer   | stable    |
| 4v1p | 0.87 | xtal | dimer   | stable    |
| 4w6g | 0.83 | bio  | monomer | stable    |
| 4w6k | 0.76 | xtal | dimer   | uncertain |
| 4wnz | 0.65 | bio  | monomer | stable    |
| 4xoh | 0.20 | bio  | dimer   | stable    |
| 4zbx | 0.12 | xtal | monomer | stable    |
| 4zqa | 0.68 | xtal | dimer   | stable    |
| 5a2n | 0.12 | xtal | dimer   | stable    |
| 5a48 | 0.13 | bio  | dimer   | uncertain |

<sup>a</sup> Yellow: incorrect classification

<sup>b</sup> Criteria for the selection of the “difficult” subset are given in Table S12

**Table S14.** Classification of test set monomers by three methods<sup>a,b</sup>

| PDB ID | ClusPro<br>probability of<br>dimer | EPPIC | PISA<br>multimer<br>class | PISA status |
|--------|------------------------------------|-------|---------------------------|-------------|
| 3w9g   | 0.23                               | xtal  | dimer                     | stable      |
| 3wea   | 0.12                               | xtal  | dimer                     | stable      |
| 3wp9   | 0.41                               | xtal  | dimer                     | stable      |
| 3wpj   | 0.12                               | bio   | monomer                   | stable      |
| 4c41   | 0.12                               | bio   | monomer                   | stable      |
| 4cbm   | 0.12                               | bio   | dimer                     | uncertain   |
| 4cfi   | 0.12                               | bio   | monomer                   | stable      |
| 4chj   | 0.83                               | xtal  | tetramer                  | uncertain   |
| 4d5r   | 0.81                               | bio   | dimer                     | stable      |
| 4k51   | 0.12                               | xtal  | trimer                    | stable      |
| 4l8i   | 0.12                               | xtal  | dimer                     | stable      |
| 4l9h   | 0.78                               | bio   | monomer                   | stable      |
| 4lcm   | 0.12                               | xtal  | dimer                     | stable      |
| 4lhf   | 0.83                               | bio   | monomer                   | stable      |
| 4lk4   | 0.24                               | bio   | monomer                   | stable      |
| 4lso   | 0.12                               | bio   | monomer                   | stable      |
| 4m7g   | 0.12                               | bio   | monomer                   | stable      |
| 4mfi   | 0.38                               | bio   | monomer                   | stable      |
| 4n3x   | 0.82                               | xtal  | tetramer                  | stable      |
| 4n40   | 0.12                               | xtal  | trimer                    | stable      |
| 4n7f   | 0.83                               | xtal  | dimer                     | stable      |
| 4n8h   | 0.53                               | bio   | monomer                   | stable      |
| 4nl7   | 0.12                               | xtal  | dimer                     | stable      |
| 4npf   | 0.86                               | bio   | dimer                     | uncertain   |
| 4nv8   | 0.74                               | xtal  | dimer                     | stable      |
| 4nx9   | 0.68                               | bio   | monomer                   | stable      |
| 4o6x   | 0.83                               | xtal  | dimer                     | uncertain   |
| 4od4   | 0.12                               | xtal  | dimer                     | stable      |
| 4of5   | 0.12                               | bio   | monomer                   | stable      |
| 4oj0   | 0.83                               | xtal  | dimer                     | stable      |
| 4os0   | 1.00                               | xtal  | dimer                     | stable      |
| 4oyl   | 0.12                               | xtal  | trimer                    | uncertain   |
| 4oyy   | 0.12                               | xtal  | trimer                    | stable      |
| 4p0f   | 0.36                               | xtal  | dimer                     | stable      |
| 4p0m   | 0.19                               | xtal  | hexamer                   | stable      |
| 4p39   | 0.40                               | bio   | tetramer                  | stable      |
| 4p7o   | 0.16                               | xtal  | dimer                     | stable      |
| 4pa1   | 0.67                               | xtal  | dimer                     | stable      |
| 4pcf   | 0.12                               | bio   | trimer                    | uncertain   |
| 4pek   | 0.12                               | bio   | monomer                   | stable      |
| 4pgs   | 0.12                               | xtal  | dimer                     | stable      |
| 4pn7   | 0.12                               | bio   | monomer                   | stable      |
| 4ppj   | 0.12                               | bio   | monomer                   | stable      |

|      |      |      |          |           |
|------|------|------|----------|-----------|
| 4pqz | 0.12 | xtal | dimer    | uncertain |
| 4psf | 0.23 | bio  | monomer  | stable    |
| 4pug | 0.12 | bio  | dimer    | stable    |
| 4pwq | 0.13 | xtal | dimer    | uncertain |
| 4q5y | 0.23 | xtal | dimer    | stable    |
| 4q6z | 0.12 | xtal | dimer    | uncertain |
| 4q7m | 0.84 | bio  | dimer    | stable    |
| 4q9p | 0.68 | xtal | tetramer | uncertain |
| 4qcj | 0.31 | bio  | monomer  | stable    |
| 4qgy | 0.12 | bio  | monomer  | stable    |
| 4r7v | 0.18 | bio  | dimer    | stable    |
| 4rdp | 0.82 | bio  | monomer  | stable    |
| 4rid | 0.18 | bio  | tetramer | stable    |
| 4rl9 | 0.12 | xtal | tetramer | stable    |
| 4rln | 0.12 | bio  | monomer  | stable    |
| 4rs6 | 0.82 | bio  | hexamer  | stable    |
| 4rwi | 0.66 | xtal | dimer    | stable    |
| 4tks | 0.58 | bio  | monomer  | stable    |
| 4tr5 | 1.00 | bio  | monomer  | stable    |
| 4tse | 0.44 | xtal | dimer    | stable    |
| 4u2n | 1.00 | xtal | dimer    | stable    |
| 4u48 | 0.39 | bio  | monomer  | stable    |
| 4u9q | 0.46 | xtal | dimer    | uncertain |
| 4ud5 | 0.12 | xtal | dimer    | stable    |
| 4uex | 0.12 | bio  | monomer  | stable    |
| 4uu4 | 0.34 | bio  | monomer  | stable    |
| 4uz2 | 0.19 | xtal | octomer  | stable    |
| 4w5x | 0.35 | xtal | dimer    | stable    |
| 4w60 | 0.54 | xtal | dimer    | stable    |
| 4w8w | 0.82 | bio  | monomer  | stable    |
| 4wau | 0.33 | xtal | dimer    | uncertain |
| 4wj2 | 0.12 | bio  | monomer  | stable    |
| 4wmg | 0.12 | bio  | monomer  | stable    |
| 4woy | 0.59 | bio  | tetramer | stable    |
| 4wz0 | 0.62 | xtal | dimer    | stable    |
| 4x2w | 0.59 | bio  | tetramer | stable    |
| 4x43 | 0.12 | bio  | monomer  | uncertain |
| 4x8h | 0.20 | bio  | monomer  | stable    |
| 4xm4 | 0.76 | bio  | dimer    | stable    |
| 4ynw | 1.00 | bio  | dimer    | stable    |
| 5avh | 0.79 | bio  | tetramer | stable    |
| 5bth | 0.28 | bio  | monomer  | stable    |
| 5c00 | 0.83 | bio  | monomer  | stable    |

<sup>a</sup> Yellow: incorrect classification

<sup>b</sup> Criteria for the selection of the “difficult” subset are given in Table S12

**Table S15.** Impact of small interface on success rates<sup>a</sup>

| Test set (783)                   |       |         |           |       |         |      |        |
|----------------------------------|-------|---------|-----------|-------|---------|------|--------|
| Dimers                           |       |         |           |       |         |      |        |
| Interface area (Å <sup>2</sup> ) | Cases | ClusPro | ClusPro % | EPPIC | EPPIC % | PISA | PISA % |
| <600                             | 17    | 4       | 23.5%     | 4     | 23.5%   | 4    | 23.5%  |
| <800                             | 53    | 26      | 49.1%     | 20    | 37.7%   | 20   | 37.7%  |
| <1000                            | 88    | 48      | 54.5%     | 37    | 42.0%   | 34   | 38.6%  |
| Monomers                         |       |         |           |       |         |      |        |
| Interface area (Å <sup>2</sup> ) | Cases | ClusPro | ClusPro % | EPPIC | EPPIC % | PISA | PISA % |
| <600                             | 183   | 173     | 94.5%     | 165   | 90.2%   | 172  | 94.0%  |
| <800                             | 333   | 299     | 89.8%     | 294   | 88.3%   | 291  | 87.4%  |
| <1000                            | 399   | 351     | 88.0%     | 344   | 86.2%   | 335  | 84.0%  |
| Total                            |       |         |           |       |         |      |        |
| Interface area (Å <sup>2</sup> ) | Cases | ClusPro | ClusPro % | EPPIC | EPPIC % | PISA | PISA % |
| <600                             | 200   | 177     | 88.5%     | 169   | 84.5%   | 176  | 88.0%  |
| <800                             | 386   | 325     | 84.2%     | 314   | 81.3%   | 311  | 80.6%  |
| <1000                            | 487   | 399     | 81.9%     | 381   | 78.2%   | 369  | 75.8%  |

<sup>b</sup> Criteria for test selection are given in Table S9

**Table S16.** Transitional complexes: Interface area, number of near-native structures, and inferred probability of being a biological dimer for the proteins in the Nooren set<sup>a</sup>

| PDB ID  | Interface area (Å <sup>2</sup> ) | N <sub>nn</sub> | Probability (dimer) |
|---------|----------------------------------|-----------------|---------------------|
| 1a15    | 739.9                            | 0               | 0.12                |
| 1a78    | 512.7                            | 99              | 0.80                |
| 1bbh    | 765.0                            | 323             | 1.00                |
| 1beb    | 552.5                            | 112             | 0.82                |
| 1bfs    | 685.1                            | 267             | 1.00                |
| 1bft    | 688.1                            | 275             | 1.00                |
| 1bi2    | 894.5                            | 123             | 0.82                |
| 1c0w    | 862.3                            | 96              | 0.80                |
| 1cmi    | 883.6                            | 43              | 0.58                |
| 1cnt    | 981.2                            | 62              | 0.70                |
| 1cpq    | 599.6                            | 0               | 0.12                |
| 1dom    | 845.8                            | 99              | 0.80                |
| 1edh    | 900.3                            | 30              | 0.48                |
| 1ikn    | 1141.9                           | 316             | 1.00                |
| 1nfk    | 683.4                            | 32              | 0.49                |
| 1ram    | 896.2                            | 80              | 0.76                |
| 1scf    | 828.4                            | 13              | 0.29                |
| 1trz    | 793.8                            | 19              | 0.36                |
| 1vqx    | 1068.0                           | 83              | 0.77                |
| 2dtr    | 876.1                            | 164             | 0.84                |
| 2lyn    | 946.1                            | 33              | 0.50                |
| 3il8    | 918.6                            | 33              | 0.50                |
| 5cro    | 638.1                            | 126             | 0.83                |
| 6cro    | 1821.4                           | 244             | 1.00                |
| Average | 855.1                            | 111.3           | 0.68                |
| Std Dev | 257.9                            | 101.3           | 0.27                |

<sup>a</sup>Transitional complexes from Nooren and Thornton [1]

**Table S17.** Biological activity and classification of Nooren set dimers by three methods<sup>a</sup>

| Protein                                                                       | PDB ID | Biological activity |       | ClusPro probability of dimer | EPPIC | PISA multimer class | PISA status |
|-------------------------------------------------------------------------------|--------|---------------------|-------|------------------------------|-------|---------------------|-------------|
|                                                                               |        | Mono-mer            | Dimer |                              |       |                     |             |
| Lambda phage cro repressor                                                    | 5cro   | -                   | +     | 0.83                         | xtal  | 24-mer              | stable      |
|                                                                               | 6cro   |                     |       | 1                            | bio   | nopred              | n/a         |
| Corynebacterium diphtheria tox repressor                                      | 1bi2   | -                   | +     | 0.82                         | bio   | dimer               | stable      |
|                                                                               | 2dtr   |                     |       | 0.84                         | bio   | dimer               | stable      |
|                                                                               | 1c0w   |                     |       | 0.8                          | bio   | nopred              | n/a         |
|                                                                               | 1bfs   | -                   | +     | 1                            | bio   | monomer             | stable      |
| Mouse nuclear factor κB (NFκB) P50 and P65                                    | 1bft   |                     |       | 1                            | bio   | monomer             | stable      |
|                                                                               | 1ikn   |                     |       | 1                            | bio   | trimer              | stable      |
|                                                                               | 1nfk   |                     |       | 0.49                         | xtal  | tetramer            | stable      |
|                                                                               | 1ram   |                     |       | 0.76                         | bio   | tetramer            | stable      |
|                                                                               | 1vkx   |                     |       | 0.77                         | bio   | tetramer            | stable      |
| Human interleukin-8 (IL-8), type I                                            | 3il8   | +                   | +     | 0.5                          | bio   | dimer               | stable      |
| Human stromal cell-derived factor 1α (SDF1α), type I                          | 1a15   | +                   | ?     | 0.12                         | xtal  | dimer               | stable      |
| Human monocyte chemoattractant protein 1 (MCP-1), type II                     | 1dom   | +                   | +     | 0.8                          | xtal  | nopred              | n/a         |
| Human stem cell factor cytokine (SCF) (secreted soluble form)                 | 1scf   | ?                   | +     | 0.29                         | bio   | tetramer            | stable      |
| Human ciliary neurotrophic factor (CNTF)                                      | 1cnt   | +                   | ?     | 0.7                          | xtal  | dimer               | stable      |
| Human insulin                                                                 | 1trz   | +                   | ?     | 0.36                         | bio   | dodecamer           | stable      |
| Chromatium vinosum cytochrome c' type Ie (CVCP)                               | 1bbh   | +                   | ?     | 1                            | bio   | dimer               | stable      |
| Rhodobacter capsulatus cytochrome c' type IIe (RCCP)                          | 1cpq   | +                   | ?     | 0.12                         | xtal  | monomer             | stable      |
| Cow β-lactoglobulin                                                           | 1beb   | +                   | +     | 0.82                         | bio   | monomer             | stable      |
| California red abalone sperm lysin                                            | 2lyn   | +                   | +     | 0.5                          | xtal  | tetramer            | stable      |
| Mouse epithelial cadherin, first two N-terminal extracellular domain (ECAD12) | 1edh   | ?                   | +     | 0.48                         | bio   | monomer             | stable      |
| Human LC8 light chain subunit of dynein complex                               | 1cmi   | ?                   | +     | 0.58                         | bio   | tetramer            | stable      |
| Toad ovary galectin-1                                                         | 1a78   | ?                   | ?     | 0.8                          | xtal  | dimer               | uncertain   |

<sup>a</sup> Transitional complexes from Nooren and Thornton [1]



**Table S18.** Classification of the Nooren set dimers by three methods: Summary

| method      | pisa | eppic | cluspro |
|-------------|------|-------|---------|
| dimers (24) | 17   | 16    | 18      |
| dimers %    | 70.8 | 66.7% | 75.0%   |

<sup>a</sup> Transitional complexes from Nooren and Thornton [1]

**Table S19.** Transitional complexes: Interface area, number of near-native structures, and inferred probability of being a biological dimer for the proteins in the weak homodimer set selected by Dey et al. [2]

| PDB ID  | Interface area (Å <sup>2</sup> ) | N <sub>nn</sub> | Probability (dimer) |
|---------|----------------------------------|-----------------|---------------------|
| 1a15    | 739.9                            | 0               | 0.12                |
| 1a45    | 552.5                            | 1               | 0.13                |
| 1a78    | 512.7                            | 99              | 0.80                |
| 1b8e    | 648.1                            | 1               | 0.13                |
| 1bbh    | 765.0                            | 323             | 1.00                |
| 1bfs    | 685.1                            | 267             | 1.00                |
| 1cbi    | 962.9                            | 4               | 0.18                |
| 1cnt    | 981.2                            | 62              | 0.70                |
| 1cxq    | 754.5                            | 7               | 0.22                |
| 1dok    | 969.5                            | 141             | 0.83                |
| 1dto    | 983.3                            | 0               | 0.12                |
| 1dv8    | 405.3                            | 0               | 0.12                |
| 1e87    | 866.0                            | 163             | 0.84                |
| 1eaj    | 675.2                            | 0               | 0.12                |
| 1edh    | 900.3                            | 30              | 0.48                |
| 1eeq    | 679.5                            | 143             | 0.83                |
| 1erv    | 511.7                            | 317             | 1.00                |
| 1exz    | 846.3                            | 4               | 0.18                |
| 1gml    | 786.9                            | 33              | 0.50                |
| 1h65    | 1292.2                           | 172             | 0.85                |
| 1hgx    | 1046.1                           | 43              | 0.58                |
| 1ihk    | 1204.9                           | 140             | 0.83                |
| 1ii5    | 1014.6                           | 22              | 0.40                |
| 1itv    | 644.8                            | 75              | 0.75                |
| 1jr9    | 854.4                            | 142             | 0.83                |
| 1lwj    | 1318.8                           | 119             | 0.82                |
| 1neu    | 475.2                            | 0               | 0.12                |
| 1nrv    | 397.6                            | 0               | 0.12                |
| 1o7z    | 613.5                            | 0               | 0.12                |
| 1oal    | 754.5                            | 98              | 0.80                |
| 1p9y    | 1223.9                           | 30              | 0.48                |
| 1py9    | 903.7                            | 0               | 0.12                |
| 1sj1    | 367.4                            | 0               | 0.12                |
| 1tip    | 922.3                            | 132             | 0.83                |
| 1uq5    | 911.8                            | 14              | 0.31                |
| 1zop    | 1068.3                           | 175             | 0.85                |
| 2dtr    | 876.1                            | 164             | 0.84                |
| 2lyn    | 946.1                            | 33              | 0.50                |
| 3bri    | 823.7                            | 150             | 0.83                |
| 3il8    | 918.6                            | 33              | 0.50                |
| 3sdh    | 879.3                            | 104             | 0.81                |
| 5cro    | 638.1                            | 126             | 0.83                |
| Average | 817.2                            | 80.2            | 0.54                |
| Std Dev | 234.1                            | 88.0            | 0.32                |

**Table S20.** Interface area, number of near-native structures, and inferred probability of being a biological dimer for the proteins in the “others” homodimer set by Dey et al. [2]

| PDB ID | Interface area (Å <sup>2</sup> ) | Nnn | Probability (dimer) |
|--------|----------------------------------|-----|---------------------|
| 12as   | 1878.1                           | 156 | 0.84                |
| 1a3c   | 989.1                            | 173 | 0.85                |
| 1a4i   | 1354.6                           | 114 | 0.82                |
| 1aa7   | 1093.8                           | 46  | 0.60                |
| 1ad3   | 3940.1                           | 39  | 0.55                |
| 1ade   | 2699.0                           | 107 | 0.81                |
| 1af5   | 851.3                            | 0   | 0.12                |
| 1afw   | 2388.7                           | 123 | 0.82                |
| 1ajs   | 3436.9                           | 74  | 0.74                |
| 1aor   | 1209.9                           | 19  | 0.36                |
| 1aoz   | 1816.2                           | 57  | 0.67                |
| 1aq6   | 2220.5                           | 176 | 0.86                |
| 1auo   | 663.7                            | 0   | 0.12                |
| 1b16   | 2518.4                           | 176 | 0.86                |
| 1b3a   | 733.0                            | 200 | 0.91                |
| 1b5e   | 2527.4                           | 117 | 0.82                |
| 1b67   | 1595.9                           | 283 | 1.00                |
| 1b8a   | 4375.3                           | 103 | 0.81                |
| 1b8j   | 3790.5                           | 94  | 0.79                |
| 1b8z   | 1889.6                           | 242 | 1.00                |
| 1b9h   | 2858.4                           | 125 | 0.83                |
| 1bam   | 750.0                            | 128 | 0.83                |
| 1bd0   | 3042.4                           | 98  | 0.80                |
| 1bdm   | 1588.2                           | 259 | 1.00                |
| 1bif   | 889.7                            | 6   | 0.20                |
| 1biq   | 3012.6                           | 99  | 0.80                |
| 1bis   | 1478.5                           | 205 | 0.93                |
| 1bk5   | 1055.9                           | 6   | 0.20                |
| 1bkp   | 2206.0                           | 142 | 0.83                |
| 1brw   | 1060.5                           | 249 | 1.00                |
| 1bsl   | 1893.9                           | 158 | 0.84                |
| 1bsr   | 1895.4                           | 277 | 1.00                |
| 1buo   | 1927.6                           | 165 | 0.84                |
| 1bxg   | 1039.6                           | 71  | 0.73                |
| 1byf   | 844.0                            | 104 | 0.81                |
| 1byi   | 1398.3                           | 223 | 1.00                |
| 1byk   | 1514.5                           | 76  | 0.75                |
| 1c4k   | 6254.2                           | 36  | 0.53                |
| 1cd8   | 1025.3                           | 178 | 0.86                |
| 1chm   | 3230.1                           | 70  | 0.73                |
| 1cmb   | 1796.3                           | 481 | 1.00                |
| 1cnz   | 2444.9                           | 107 | 0.81                |
| 1coz   | 1053.1                           | 192 | 0.89                |
| 1csh   | 4995.4                           | 61  | 0.69                |
| 1ctt   | 1933.3                           | 134 | 0.83                |

|      |         |     |      |
|------|---------|-----|------|
| 1czj | 741.3   | 7   | 0.22 |
| 1d0c | 2753.6  | 92  | 0.79 |
| 1d2f | 1757.3  | 103 | 0.81 |
| 1d9c | 3633.0  | 82  | 0.77 |
| 1daa | 2301.1  | 181 | 0.86 |
| 1db3 | 1140.6  | 118 | 0.82 |
| 1dbq | 1532.4  | 56  | 0.66 |
| 1dcf | 1057.3  | 70  | 0.73 |
| 1dor | 2196.2  | 130 | 0.83 |
| 1dos | 2333.0  | 145 | 0.83 |
| 1dpg | 2278.7  | 167 | 0.84 |
| 1dqn | 1724.8  | 88  | 0.78 |
| 1dqs | 1604.6  | 87  | 0.78 |
| 1dxg | 709.8   | 340 | 1.00 |
| 1e1z | 1235.7  | 17  | 0.34 |
| 1e4m | 946.6   | 85  | 0.78 |
| 1e58 | 725.7   | 219 | 0.99 |
| 1e6b | 1144.8  | 52  | 0.64 |
| 1e6u | 1499.9  | 87  | 0.78 |
| 1e7n | 811.9   | 247 | 1.00 |
| 1ebh | 1781.7  | 115 | 0.82 |
| 1ecy | 1562.5  | 63  | 0.70 |
| 1elu | 2940.7  | 85  | 0.78 |
| 1ew3 | 1024.9  | 218 | 0.99 |
| 1ex0 | 2414.9  | 52  | 0.64 |
| 1eyv | 1067.3  | 183 | 0.87 |
| 1f3h | 524.5   | 346 | 1.00 |
| 1f6b | 743.7   | 0   | 0.12 |
| 1f89 | 1407.8  | 134 | 0.83 |
| 1fc4 | 4891.9  | 65  | 0.71 |
| 1fg7 | 3227.5  | 73  | 0.74 |
| 1fi4 | 1373.5  | 140 | 0.83 |
| 1fip | 1578.0  | 209 | 0.94 |
| 1fjj | 873.0   | 134 | 0.83 |
| 1fp1 | 4526.7  | 86  | 0.78 |
| 1fp2 | 4159.7  | 80  | 0.76 |
| 1fp5 | 982.5   | 96  | 0.80 |
| 1fro | 3575.0  | 96  | 0.80 |
| 1g5c | 2129.7  | 231 | 1.00 |
| 1g60 | 1926.3  | 141 | 0.83 |
| 1g8l | 2120.0  | 80  | 0.76 |
| 1gd9 | 2637.7  | 154 | 0.84 |
| 1glj | 1588.3  | 258 | 1.00 |
| 1gnw | 1156.5  | 102 | 0.81 |
| 1gqi | 1935.6  | 50  | 0.63 |
| 1gt3 | 2338.9  | 171 | 0.85 |
| 1gta | 1504.9  | 96  | 0.80 |
| 1gte | 11367.4 | 11  | 0.27 |
| 1gu7 | 894.7   | 188 | 0.88 |
| 1gvj | 1194.9  | 120 | 0.82 |
| 1gvp | 905.1   | 192 | 0.89 |
| 1gy6 | 1241.9  | 175 | 0.85 |
| 1gyo | 610.9   | 0   | 0.12 |

|      |        |     |      |
|------|--------|-----|------|
| 1h16 | 1890.0 | 157 | 0.84 |
| 1h1y | 945.2  | 119 | 0.82 |
| 1h4v | 3708.2 | 69  | 0.73 |
| 1h7e | 1361.9 | 173 | 0.85 |
| 1h9r | 1386.3 | 66  | 0.71 |
| 1hf2 | 1041.6 | 208 | 0.94 |
| 1hjr | 962.0  | 83  | 0.77 |
| 1hpx | 1731.3 | 273 | 1.00 |
| 1hq8 | 1016.7 | 151 | 0.83 |
| 1hss | 1095.5 | 64  | 0.70 |
| 1hw1 | 1593.0 | 138 | 0.83 |
| 1hxp | 3398.7 | 113 | 0.82 |
| 1hzj | 976.3  | 188 | 0.88 |
| 1i07 | 1960.6 | 201 | 0.91 |
| 1i24 | 2423.5 | 101 | 0.81 |
| 1i2k | 2225.1 | 175 | 0.85 |
| 1i4u | 1285.5 | 66  | 0.71 |
| 1i52 | 1822.5 | 126 | 0.83 |
| 1i69 | 1069.1 | 58  | 0.68 |
| 1i86 | 2974.1 | 75  | 0.75 |
| 1imb | 1648.7 | 185 | 0.87 |
| 1is3 | 748.3  | 66  | 0.71 |
| 1iup | 987.0  | 153 | 0.83 |
| 1ivy | 1586.2 | 141 | 0.83 |
| 1ix9 | 907.8  | 115 | 0.82 |
| 1iyz | 948.2  | 68  | 0.72 |
| 1j3b | 973.1  | 0   | 0.12 |
| 1j5p | 2146.1 | 172 | 0.85 |
| 1j98 | 1869.9 | 125 | 0.83 |
| 1jd0 | 1121.6 | 0   | 0.12 |
| 1jdw | 1473.4 | 101 | 0.81 |
| 1jhd | 1547.2 | 44  | 0.59 |
| 1jhg | 2225.9 | 349 | 1.00 |
| 1jm6 | 1096.3 | 7   | 0.22 |
| 1jsc | 2200.4 | 113 | 0.82 |
| 1jsg | 789.3  | 146 | 0.83 |
| 1jtv | 2603.8 | 141 | 0.83 |
| 1jye | 1528.6 | 88  | 0.78 |
| 1jys | 1249.1 | 162 | 0.84 |
| 1k04 | 2356.6 | 107 | 0.81 |
| 1k3y | 1405.9 | 104 | 0.81 |
| 1k51 | 2340.5 | 133 | 0.83 |
| 1k66 | 1248.4 | 191 | 0.88 |
| 1k94 | 1820.6 | 272 | 1.00 |
| 1kc7 | 2030.4 | 105 | 0.81 |
| 1kcm | 1510.7 | 148 | 0.83 |
| 1kic | 942.7  | 0   | 0.12 |
| 1kjq | 2304.9 | 99  | 0.80 |
| 1kkj | 3700.6 | 115 | 0.82 |
| 1kll | 2050.8 | 220 | 1.00 |
| 1kly | 1642.4 | 226 | 1.00 |
| 1knq | 1029.8 | 165 | 0.84 |
| 1kpf | 1855.0 | 198 | 0.90 |

|      |        |     |      |
|------|--------|-----|------|
| 1kso | 1680.6 | 291 | 1.00 |
| 1kta | 2339.6 | 159 | 0.84 |
| 1ktb | 989.9  | 2   | 0.15 |
| 1kzh | 2096.1 | 103 | 0.81 |
| 1lc5 | 1943.0 | 231 | 1.00 |
| 1llf | 681.6  | 0   | 0.12 |
| 1lom | 3217.1 | 40  | 0.56 |
| 1lxe | 2444.8 | 61  | 0.69 |
| 1m6p | 1017.7 | 99  | 0.80 |
| 1m7y | 2701.7 | 118 | 0.82 |
| 1mh9 | 1132.0 | 137 | 0.83 |
| 1mkb | 1598.0 | 124 | 0.82 |
| 1mo9 | 4712.5 | 95  | 0.80 |
| 1mor | 2528.4 | 97  | 0.80 |
| 1mqi | 787.9  | 24  | 0.42 |
| 1mr8 | 1289.3 | 387 | 1.00 |
| 1mvc | 1084.3 | 64  | 0.70 |
| 1mze | 1614.9 | 416 | 1.00 |
| 1n1b | 1177.6 | 212 | 0.96 |
| 1n26 | 1112.5 | 3   | 0.16 |
| 1n2s | 1374.1 | 155 | 0.84 |
| 1n55 | 1397.6 | 189 | 0.88 |
| 1n57 | 945.8  | 162 | 0.84 |
| 1n7f | 633.1  | 44  | 0.59 |
| 1nf9 | 1320.5 | 230 | 1.00 |
| 1nkd | 1377.7 | 154 | 0.84 |
| 1nn5 | 769.8  | 232 | 1.00 |
| 1noj | 2540.4 | 79  | 0.76 |
| 1nox | 2966.1 | 122 | 0.82 |
| 1ns5 | 1107.9 | 214 | 0.97 |
| 1nsj | 1420.5 | 326 | 1.00 |
| 1nsy | 2583.3 | 120 | 0.82 |
| 1o8b | 1077.0 | 170 | 0.85 |
| 1oaa | 1932.7 | 137 | 0.83 |
| 1oac | 7135.2 | 16  | 0.33 |
| 1oc2 | 1300.9 | 132 | 0.83 |
| 1oh0 | 1038.7 | 89  | 0.79 |
| 1oi6 | 1646.7 | 139 | 0.83 |
| 1oke | 1929.2 | 12  | 0.28 |
| 1on2 | 1257.2 | 120 | 0.82 |
| 1oqz | 990.0  | 9   | 0.24 |
| 1ov3 | 2449.9 | 143 | 0.83 |
| 1oyb | 735.5  | 44  | 0.59 |
| 1oys | 1387.3 | 127 | 0.83 |
| 1p5f | 1339.3 | 156 | 0.84 |
| 1pfq | 2176.4 | 89  | 0.79 |
| 1pre | 2280.7 | 33  | 0.50 |
| 1psr | 1199.3 | 291 | 1.00 |
| 1puc | 2148.8 | 199 | 0.91 |
| 1pv9 | 1663.1 | 58  | 0.68 |
| 1pxf | 2202.5 | 243 | 1.00 |
| 1q3o | 604.3  | 0   | 0.12 |
| 1q4g | 2503.8 | 30  | 0.48 |

|      |        |     |      |
|------|--------|-----|------|
| 1q6o | 1444.6 | 71  | 0.73 |
| 1qfh | 2275.0 | 55  | 0.66 |
| 1qhi | 1698.8 | 103 | 0.81 |
| 1qi9 | 5330.3 | 36  | 0.53 |
| 1qj4 | 844.8  | 102 | 0.81 |
| 1qjb | 973.9  | 101 | 0.81 |
| 1qkk | 923.9  | 51  | 0.64 |
| 1qks | 1288.6 | 28  | 0.46 |
| 1qo8 | 1233.0 | 22  | 0.40 |
| 1qr2 | 1917.0 | 130 | 0.83 |
| 1qvz | 549.1  | 0   | 0.12 |
| 1qyc | 1146.8 | 300 | 1.00 |
| 1r2f | 1741.9 | 127 | 0.83 |
| 1r31 | 4779.1 | 88  | 0.78 |
| 1r3s | 1233.5 | 78  | 0.76 |
| 1r7a | 958.3  | 103 | 0.81 |
| 1rdo | 663.4  | 294 | 1.00 |
| 1reg | 676.5  | 0   | 0.12 |
| 1rrm | 1153.9 | 95  | 0.80 |
| 1ryt | 1638.5 | 152 | 0.83 |
| 1s0a | 5189.6 | 85  | 0.78 |
| 1s3e | 2042.9 | 23  | 0.41 |
| 1sb8 | 1176.5 | 82  | 0.77 |
| 1se8 | 1097.1 | 19  | 0.36 |
| 1ses | 2229.6 | 107 | 0.81 |
| 1sjy | 1526.2 | 140 | 0.83 |
| 1smn | 868.4  | 164 | 0.84 |
| 1smt | 1969.4 | 278 | 1.00 |
| 1sox | 1410.1 | 87  | 0.78 |
| 1t0i | 1317.6 | 261 | 1.00 |
| 1t5h | 1329.7 | 48  | 0.62 |
| 1tc1 | 1505.7 | 92  | 0.79 |
| 1tox | 3703.5 | 86  | 0.78 |
| 1trb | 2735.2 | 170 | 0.85 |
| 1trk | 4418.3 | 54  | 0.65 |
| 1tw3 | 3376.7 | 177 | 0.86 |
| 1ual | 3517.1 | 110 | 0.82 |
| 1uby | 2162.4 | 135 | 0.83 |
| 1ui8 | 6595.9 | 8   | 0.23 |
| 1ukg | 838.3  | 25  | 0.43 |
| 1utg | 1464.2 | 177 | 0.86 |
| 1uyr | 5132.3 | 10  | 0.26 |
| 1v25 | 2850.8 | 129 | 0.83 |
| 1v2z | 841.3  | 142 | 0.83 |
| 1vfr | 3355.7 | 73  | 0.74 |
| 1vhz | 2820.5 | 148 | 0.83 |
| 1vls | 1254.6 | 44  | 0.59 |
| 1vok | 1582.6 | 159 | 0.84 |
| 1xso | 666.8  | 102 | 0.81 |
| 2arc | 810.3  | 83  | 0.77 |
| 2gsa | 4576.7 | 85  | 0.78 |
| 2hdh | 1604.4 | 260 | 1.00 |
| 2ilk | 4479.7 | 43  | 0.58 |

|         |        |       |      |
|---------|--------|-------|------|
| 2mjp    | 950.0  | 252   | 1.00 |
| 2nac    | 3793.4 | 180   | 0.86 |
| 2ohx    | 1685.1 | 339   | 1.00 |
| 2spc    | 2513.5 | 57    | 0.67 |
| 2tct    | 2612.3 | 137   | 0.83 |
| 2tgi    | 1260.4 | 145   | 0.83 |
| 3dap    | 2653.4 | 154   | 0.84 |
| 3lad    | 3364.1 | 120   | 0.82 |
| 3ssi    | 838.4  | 115   | 0.82 |
| 3vub    | 1003.5 | 296   | 1.00 |
| 4kbp    | 1467.9 | 125   | 0.83 |
| 5csm    | 2000.1 | 38    | 0.54 |
| 5rub    | 2829.1 | 99    | 0.80 |
| 8prk    | 968.0  | 239   | 1.00 |
| 9wga    | 2298.4 | 151   | 0.83 |
| Average | 1922.8 | 125.9 | 0.75 |
| Std Dev | 1260.2 | 83.2  | 0.22 |



**Table S21.** Classification of the weak set of dimers by Dey et al. [2]

| PDB ID | Kd ( $\mu\text{M}$ ) | ClusPro probability of dimer | EPPIC | PISA multimer class | PISA status |
|--------|----------------------|------------------------------|-------|---------------------|-------------|
| 1a15   | 150                  | 0.12                         | xtal  | dimer               | stable      |
| 1a45   | —                    | 0.13                         | xtal  | monomer             | stable      |
| 1a78   | 7                    | 0.80                         | xtal  | dimer               | uncertain   |
| 1b8e   | 5–200                | 0.13                         | bio   | monomer             | stable      |
| 1bbh   | 2000                 | 1.00                         | bio   | dimer               | stable      |
| 1bfs   | 0.7                  | 1.00                         | bio   | monomer             | stable      |
| 1cbi   | > 100                | 0.18                         | xtal  | dimer               | stable      |
| 1cnt   | $\approx$ 40         | 0.70                         | xtal  | dimer               | stable      |
| 1cxq   | 10–50                | 0.22                         | bio   | dimer               | stable      |
| 1dok   | 1–10                 | 0.83                         | xtal  | tetramer            | stable      |
| 1dto   | 0.03                 | 0.12                         | xtal  | monomer             | stable      |
| 1dv8   | —                    | 0.12                         | xtal  | dimer               | stable      |
| 1e87   | —                    | 0.84                         | xtal  | monomer             | stable      |
| 1eaj   | 16                   | 0.12                         | bio   | dimer               | stable      |
| 1edh   | 170–720              | 0.48                         | bio   | monomer             | stable      |
| 1eeq   | 0.012                | 0.83                         | xtal  | dimer               | stable      |
| 1erv   | 6–160                | 1.00                         | bio   | dimer               | uncertain   |
| 1exz   | < 0.1                | 0.18                         | bio   | tetramer            | stable      |
| 1gml   | —                    | 0.50                         | bio   | dimer               | uncertain   |
| 1h65   | —                    | 0.85                         | xtal  | dimer               | stable      |
| 1hgx   | —                    | 0.58                         | xtal  | dimer               | stable      |
| 1ihk   | 0.7                  | 0.83                         | xtal  | dimer               | stable      |
| 1ii5   | 0.8                  | 0.40                         | bio   | dimer               | uncertain   |
| 1itv   | —                    | 0.75                         | bio   | monomer             | stable      |
| 1jr9   | —                    | 0.83                         | bio   | dimer               | stable      |
| 1lwj   | —                    | 0.82                         | bio   | dimer               | stable      |
| 1neu   | 900                  | 0.12                         | xtal  | monomer             | stable      |
| 1nrv   | 2                    | 0.12                         | xtal  | monomer             | stable      |
| 1o7z   | 9                    | 0.12                         | xtal  | dimer               | stable      |
| 1oal   | 0.3                  | 0.80                         | bio   | dimer               | stable      |
| 1p9y   | 18                   | 0.48                         | bio   | monomer             | stable      |
| 1py9   | —                    | 0.12                         | bio   | dimer               | stable      |
| 1sj1   | —                    | 0.12                         | xtal  | monomer             | stable      |
| 1tip   | —                    | 0.83                         | xtal  | monomer             | stable      |
| 1uq5   | —                    | 0.31                         | xtal  | dimer               | stable      |
| 1zop   | —                    | 0.85                         | bio   | dimer               | stable      |
| 2dtr   | 0.033                | 0.84                         | bio   | dimer               | stable      |
| 2lyn   | $\approx$ 1          | 0.50                         | xtal  | tetramer            | stable      |
| 3bri   | 12                   | 0.83                         | bio   | dimer               | stable      |
| 3ii8   | 0.3–18               | 0.50                         | bio   | dimer               | stable      |
| 3sdh   | 0.013                | 0.81                         | bio   | dimer               | stable      |
| 5cro   | 0.3                  | 0.83                         | xtal  | 24-mer              | stable      |

**Table S22.** Classification of the “others” set of dimers by Dey et al. [2]

| PDB ID | ClusPro probability of dimer | EPPIC | PISA multimer class | PISA status |
|--------|------------------------------|-------|---------------------|-------------|
| 12as   | 0.84                         | bio   | dimer               | stable      |
| 1a3c   | 0.85                         | bio   | dimer               | stable      |
| 1a4i   | 0.82                         | bio   | dimer               | stable      |
| 1aa7   | 0.60                         | bio   | monomer             | stable      |
| 1ad3   | 0.55                         | bio   | dimer               | stable      |
| 1ade   | 0.81                         | bio   | dimer               | stable      |
| 1af5   | 0.12                         | bio   | dimer               | stable      |
| 1afw   | 0.82                         | bio   | dimer               | stable      |
| 1ajs   | 0.74                         | bio   | dimer               | stable      |
| 1aor   | 0.36                         | bio   | dimer               | stable      |
| 1aoz   | 0.67                         | xtal  | tetramer            | stable      |
| 1aq6   | 0.86                         | bio   | dimer               | stable      |
| 1auo   | 0.12                         | bio   | dimer               | stable      |
| 1b16   | 0.86                         | bio   | dimer               | stable      |
| 1b3a   | 0.91                         | bio   | dimer               | stable      |
| 1b5e   | 0.82                         | bio   | dimer               | stable      |
| 1b67   | 1.00                         | xtal  | dimer               | stable      |
| 1b8a   | 0.81                         | bio   | dimer               | stable      |
| 1b8j   | 0.79                         | bio   | dimer               | stable      |
| 1b8z   | 1.00                         | bio   | dimer               | stable      |
| 1b9h   | 0.83                         | bio   | dimer               | stable      |
| 1bam   | 0.83                         | xtal  | dimer               | uncertain   |
| 1bd0   | 0.80                         | bio   | dimer               | stable      |
| 1bdm   | 1.00                         | bio   | dimer               | stable      |
| 1bif   | 0.20                         | xtal  | monomer             | stable      |
| 1biq   | 0.80                         | bio   | dimer               | stable      |
| 1bis   | 0.93                         | bio   | dimer               | stable      |
| 1bk5   | 0.20                         | bio   | monomer             | stable      |
| 1bkp   | 0.83                         | bio   | dimer               | stable      |
| 1brw   | 1.00                         | bio   | dimer               | stable      |
| 1bsl   | 0.84                         | bio   | dimer               | stable      |
| 1bsr   | 1.00                         | bio   | tetramer            | stable      |
| 1buo   | 0.84                         | bio   | dimer               | stable      |
| 1bxg   | 0.73                         | bio   | dimer               | uncertain   |
| 1byf   | 0.81                         | bio   | dimer               | stable      |
| 1byi   | 1.00                         | bio   | dimer               | stable      |
| 1byk   | 0.75                         | bio   | dimer               | stable      |
| 1c4k   | 0.53                         | bio   | dimer               | stable      |
| 1cd8   | 0.86                         | bio   | dimer               | stable      |
| 1chm   | 0.73                         | bio   | dimer               | stable      |
| 1cmb   | 1.00                         | bio   | dimer               | stable      |
| 1cnz   | 0.81                         | bio   | dimer               | stable      |
| 1coz   | 0.89                         | bio   | dimer               | stable      |

|      |      |      |          |           |
|------|------|------|----------|-----------|
| 1csh | 0.69 | bio  | dimer    | stable    |
| 1ctt | 0.83 | bio  | dimer    | stable    |
| 1czj | 0.22 | bio  | dimer    | stable    |
| 1d0c | 0.79 | bio  | dimer    | stable    |
| 1d2f | 0.81 | bio  | dimer    | stable    |
| 1d9c | 0.77 | bio  | dimer    | stable    |
| 1daa | 0.86 | bio  | dimer    | stable    |
| 1db3 | 0.82 | bio  | hexamer  | stable    |
| 1dbq | 0.66 | bio  | dimer    | stable    |
| 1dcf | 0.73 | bio  | dimer    | stable    |
| 1dor | 0.83 | bio  | dimer    | stable    |
| 1dos | 0.83 | bio  | dimer    | stable    |
| 1dpg | 0.84 | bio  | dimer    | stable    |
| 1dqn | 0.78 | bio  | dimer    | stable    |
| 1dqs | 0.78 | bio  | dimer    | stable    |
| 1dxg | 1.00 | bio  | dimer    | stable    |
| 1e1z | 0.34 | bio  | octomer  | stable    |
| 1e4m | 0.78 | bio  | dimer    | stable    |
| 1e58 | 0.99 | xtal | dimer    | stable    |
| 1e6b | 0.64 | xtal | dimer    | stable    |
| 1e6u | 0.78 | bio  | dimer    | stable    |
| 1e7n | 1.00 | bio  | dimer    | uncertain |
| 1ebh | 0.82 | bio  | dimer    | stable    |
| 1ecy | 0.70 | bio  | monomer  | stable    |
| 1elu | 0.78 | bio  | dimer    | stable    |
| 1ew3 | 0.99 | xtal | dimer    | stable    |
| 1ex0 | 0.64 | bio  | dimer    | stable    |
| 1eyv | 0.87 | xtal | dimer    | stable    |
| 1f3h | 1.00 | xtal | dimer    | stable    |
| 1f6b | 0.12 | xtal | monomer  | stable    |
| 1f89 | 0.83 | bio  | dimer    | stable    |
| 1fc4 | 0.71 | bio  | dimer    | stable    |
| 1fg7 | 0.74 | bio  | dimer    | stable    |
| 1fi4 | 0.83 | bio  | dimer    | stable    |
| 1fip | 0.94 | bio  | tetramer | stable    |
| 1fjj | 0.83 | bio  | monomer  | stable    |
| 1fp1 | 0.78 | bio  | dimer    | stable    |
| 1fp2 | 0.76 | bio  | dimer    | stable    |
| 1fp5 | 0.80 | bio  | dimer    | stable    |
| 1fro | 0.80 | bio  | dimer    | stable    |
| 1g5c | 1.00 | bio  | dimer    | stable    |
| 1g60 | 0.83 | bio  | dimer    | stable    |
| 1g8l | 0.76 | xtal | dimer    | stable    |
| 1gd9 | 0.84 | bio  | dimer    | stable    |
| 1glj | 1.00 | bio  | dimer    | stable    |
| 1gnw | 0.81 | bio  | dimer    | stable    |
| 1gqi | 0.63 | bio  | monomer  | stable    |
| 1gt3 | 0.85 | bio  | dimer    | stable    |
| 1gta | 0.80 | bio  | dimer    | stable    |

|      |      |      |          |           |
|------|------|------|----------|-----------|
| 1gte | 0.27 | bio  | dimer    | stable    |
| 1gu7 | 0.88 | bio  | dimer    | stable    |
| 1gvj | 0.82 | xtal | dimer    | stable    |
| 1gvp | 0.89 | bio  | dimer    | stable    |
| 1gy6 | 0.85 | bio  | dimer    | stable    |
| 1gyo | 0.12 | xtal | dimer    | stable    |
| 1h16 | 0.84 | bio  | dimer    | stable    |
| 1h1y | 0.82 | bio  | dimer    | stable    |
| 1h4v | 0.73 | bio  | dimer    | stable    |
| 1h7e | 0.85 | bio  | dimer    | stable    |
| 1h9r | 0.71 | bio  | nopred   | n/a       |
| 1hf2 | 0.94 | bio  | tetramer | stable    |
| 1hjr | 0.77 | bio  | dimer    | stable    |
| 1hpx | 1.00 | bio  | dimer    | stable    |
| 1hq8 | 0.83 | xtal | dimer    | uncertain |
| 1hss | 0.70 | bio  | dimer    | stable    |
| 1hw1 | 0.83 | bio  | dimer    | stable    |
| 1hxp | 0.82 | bio  | dimer    | stable    |
| 1hzj | 0.88 | bio  | dimer    | stable    |
| 1i07 | 0.91 | bio  | dimer    | stable    |
| 1i24 | 0.81 | bio  | tetramer | stable    |
| 1i2k | 0.85 | bio  | dimer    | stable    |
| 1i4u | 0.71 | xtal | dimer    | stable    |
| 1i52 | 0.83 | bio  | dimer    | stable    |
| 1i69 | 0.68 | bio  | dimer    | stable    |
| 1i86 | 0.75 | bio  | dimer    | stable    |
| 1imb | 0.87 | xtal | dimer    | stable    |
| 1is3 | 0.71 | bio  | dimer    | uncertain |
| 1iup | 0.83 | bio  | monomer  | stable    |
| 1ivy | 0.83 | bio  | dimer    | stable    |
| 1ix9 | 0.82 | xtal | dimer    | stable    |
| 1iyz | 0.72 | bio  | dimer    | stable    |
| 1j3b | 0.12 | bio  | dimer    | stable    |
| 1j5p | 0.85 | bio  | dimer    | stable    |
| 1j98 | 0.83 | bio  | dimer    | stable    |
| 1jd0 | 0.12 | xtal | monomer  | stable    |
| 1jdw | 0.81 | bio  | dimer    | stable    |
| 1jhd | 0.59 | bio  | dimer    | stable    |
| 1jhg | 1.00 | bio  | dimer    | stable    |
| 1jm6 | 0.22 | bio  | dimer    | stable    |
| 1jsc | 0.82 | bio  | dimer    | stable    |
| 1jsg | 0.83 | bio  | tetramer | stable    |
| 1jtv | 0.83 | bio  | dimer    | stable    |
| 1jye | 0.78 | bio  | dimer    | stable    |
| 1jys | 0.84 | bio  | dimer    | stable    |
| 1k04 | 0.81 | bio  | dimer    | stable    |
| 1k3y | 0.81 | bio  | dimer    | stable    |
| 1k51 | 0.83 | bio  | dimer    | stable    |
| 1k66 | 0.88 | xtal | dimer    | stable    |

|      |      |      |          |           |
|------|------|------|----------|-----------|
| 1k94 | 1.00 | bio  | dimer    | stable    |
| 1kc7 | 0.81 | bio  | dimer    | stable    |
| 1kcm | 0.83 | bio  | dimer    | stable    |
| 1kic | 0.12 | bio  | dimer    | stable    |
| 1kjq | 0.80 | bio  | dimer    | stable    |
| 1kkj | 0.82 | bio  | dimer    | stable    |
| 1kl  | 1.00 | xtal | dimer    | stable    |
| 1kly | 1.00 | bio  | dimer    | stable    |
| 1knq | 0.84 | bio  | dimer    | uncertain |
| 1kpf | 0.90 | bio  | dimer    | stable    |
| 1kso | 1.00 | bio  | dimer    | stable    |
| 1kta | 0.84 | bio  | dimer    | stable    |
| 1ktb | 0.15 | bio  | dimer    | stable    |
| 1kzh | 0.81 | bio  | dimer    | stable    |
| 1lc5 | 1.00 | bio  | dimer    | stable    |
| 1llf | 0.12 | xtal | dimer    | stable    |
| 1lom | 0.56 | bio  | dimer    | stable    |
| 1lxe | 0.69 | bio  | dimer    | stable    |
| 1m6p | 0.80 | bio  | dimer    | stable    |
| 1m7y | 0.82 | bio  | dimer    | stable    |
| 1mh9 | 0.83 | bio  | dimer    | stable    |
| 1mkb | 0.82 | bio  | dimer    | stable    |
| 1mo9 | 0.80 | bio  | dimer    | stable    |
| 1mor | 0.80 | bio  | dimer    | stable    |
| 1mqi | 0.42 | xtal | dimer    | uncertain |
| 1mr8 | 1.00 | bio  | tetramer | stable    |
| 1mvc | 0.70 | bio  | dimer    | stable    |
| 1mze | 1.00 | bio  | dimer    | stable    |
| 1n1b | 0.96 | xtal | dimer    | stable    |
| 1n26 | 0.16 | xtal | dimer    | stable    |
| 1n2s | 0.84 | bio  | dimer    | stable    |
| 1n55 | 0.88 | bio  | dimer    | stable    |
| 1n57 | 0.84 | bio  | dimer    | stable    |
| 1n7f | 0.59 | xtal | tetramer | stable    |
| 1nf9 | 1.00 | bio  | dimer    | stable    |
| 1nkd | 0.84 | bio  | dimer    | stable    |
| 1nn5 | 1.00 | bio  | dimer    | stable    |
| 1noj | 0.76 | bio  | dimer    | stable    |
| 1nox | 0.82 | bio  | dimer    | stable    |
| 1ns5 | 0.97 | bio  | dimer    | stable    |
| 1nsj | 1.00 | bio  | dimer    | stable    |
| 1nsy | 0.82 | bio  | dimer    | stable    |
| 1o8b | 0.85 | xtal | dimer    | stable    |
| 1oaa | 0.83 | bio  | dimer    | stable    |
| 1oac | 0.33 | bio  | dimer    | stable    |
| 1oc2 | 0.83 | bio  | dimer    | stable    |
| 1oh0 | 0.79 | bio  | dimer    | stable    |
| 1oi6 | 0.83 | bio  | dimer    | stable    |
| 1oke | 0.28 | xtal | dimer    | stable    |

|      |      |      |          |           |
|------|------|------|----------|-----------|
| 1on2 | 0.82 | bio  | dimer    | stable    |
| 1oqz | 0.24 | xtal | monomer  | stable    |
| 1ov3 | 0.83 | bio  | octomer  | stable    |
| 1oyb | 0.59 | bio  | monomer  | stable    |
| 1oys | 0.83 | bio  | dimer    | uncertain |
| 1p5f | 0.84 | bio  | dimer    | stable    |
| 1pfq | 0.79 | bio  | dimer    | stable    |
| 1pre | 0.50 | bio  | dimer    | stable    |
| 1psr | 1.00 | bio  | dimer    | stable    |
| 1puc | 0.91 | bio  | dimer    | stable    |
| 1pv9 | 0.68 | bio  | dimer    | stable    |
| 1pxf | 1.00 | bio  | dimer    | stable    |
| 1q3o | 0.12 | xtal | dimer    | stable    |
| 1q4g | 0.48 | bio  | dimer    | stable    |
| 1q6o | 0.73 | bio  | tetramer | stable    |
| 1qfh | 0.66 | bio  | dimer    | stable    |
| 1qhi | 0.81 | bio  | dimer    | stable    |
| 1qi9 | 0.53 | bio  | dimer    | stable    |
| 1qj4 | 0.81 | xtal | dimer    | stable    |
| 1qjb | 0.81 | bio  | tetramer | stable    |
| 1qkk | 0.64 | bio  | tetramer | stable    |
| 1qks | 0.46 | bio  | dimer    | stable    |
| 1qo8 | 0.40 | bio  | monomer  | stable    |
| 1qr2 | 0.83 | bio  | dimer    | stable    |
| 1qvz | 0.12 | xtal | monomer  | stable    |
| 1qyc | 1.00 | xtal | dimer    | stable    |
| 1r2f | 0.83 | bio  | dimer    | stable    |
| 1r31 | 0.78 | bio  | hexamer  | stable    |
| 1r3s | 0.76 | bio  | dimer    | stable    |
| 1r7a | 0.81 | bio  | dimer    | uncertain |
| 1rdo | 1.00 | xtal | dimer    | stable    |
| 1reg | 0.12 | bio  | dimer    | stable    |
| 1rrm | 0.80 | bio  | dimer    | stable    |
| 1ryt | 0.83 | bio  | tetramer | stable    |
| 1s0a | 0.78 | bio  | dimer    | stable    |
| 1s3e | 0.41 | bio  | dimer    | stable    |
| 1sb8 | 0.77 | bio  | dimer    | stable    |
| 1se8 | 0.36 | bio  | dimer    | stable    |
| 1ses | 0.81 | bio  | dimer    | stable    |
| 1sjy | 0.83 | bio  | dimer    | stable    |
| 1smn | 0.84 | xtal | dimer    | uncertain |
| 1smt | 1.00 | bio  | dimer    | stable    |
| 1sox | 0.78 | bio  | dimer    | stable    |
| 1t0i | 1.00 | bio  | tetramer | stable    |
| 1t5h | 0.62 | bio  | monomer  | stable    |
| 1tc1 | 0.79 | bio  | dimer    | stable    |
| 1tox | 0.78 | bio  | dimer    | stable    |
| 1trb | 0.85 | bio  | dimer    | stable    |
| 1trk | 0.65 | bio  | dimer    | stable    |

|      |      |      |          |           |
|------|------|------|----------|-----------|
| 1tw3 | 0.86 | bio  | dimer    | stable    |
| 1ual | 0.82 | bio  | dimer    | stable    |
| 1uby | 0.83 | bio  | dimer    | stable    |
| 1ui8 | 0.23 | bio  | dimer    | stable    |
| 1ukg | 0.43 | xtal | dimer    | uncertain |
| 1utg | 0.86 | bio  | dimer    | stable    |
| 1uyr | 0.26 | bio  | dimer    | stable    |
| 1v25 | 0.83 | bio  | dimer    | stable    |
| 1v2z | 0.83 | bio  | dimer    | stable    |
| 1vfr | 0.74 | bio  | dimer    | stable    |
| 1vhz | 0.83 | bio  | dimer    | stable    |
| 1vls | 0.59 | bio  | dimer    | stable    |
| 1vok | 0.84 | bio  | tetramer | stable    |
| 1xso | 0.81 | bio  | dimer    | stable    |
| 2arc | 0.77 | bio  | monomer  | stable    |
| 2gsa | 0.78 | bio  | dimer    | stable    |
| 2hdh | 1.00 | bio  | dimer    | stable    |
| 2ilk | 0.58 | bio  | dimer    | stable    |
| 2mjp | 1.00 | bio  | dimer    | stable    |
| 2nac | 0.86 | bio  | dimer    | stable    |
| 2ohx | 1.00 | xtal | dimer    | stable    |
| 2spc | 0.67 | bio  | dimer    | stable    |
| 2tct | 0.83 | bio  | dimer    | stable    |
| 2tgi | 0.83 | bio  | dimer    | stable    |
| 3dap | 0.84 | bio  | dimer    | stable    |
| 3lad | 0.82 | bio  | dimer    | stable    |
| 3ssi | 0.82 | bio  | dimer    | stable    |
| 3vub | 1.00 | bio  | dimer    | stable    |
| 4kbp | 0.83 | bio  | tetramer | stable    |
| 5csm | 0.54 | bio  | dimer    | stable    |
| 5rub | 0.80 | bio  | dimer    | stable    |
| 8prk | 1.00 | bio  | dimer    | stable    |
| 9wga | 0.83 | bio  | dimer    | stable    |

---

**Table S23.** Classification of the weak set of dimers by Dey et al. [2] using three methods: Summary

| method      | pisa  | eppic | cluspro |
|-------------|-------|-------|---------|
| dimers (42) | 22    | 21    | 24      |
| dimers %    | 52.4% | 50.0% | 57.1%   |

**Table S24.** Classification of the “others” set of dimers by Dey et al. [2] using three methods: Summary

| method       | pisa  | eppic | cluspro |
|--------------|-------|-------|---------|
| dimers (272) | 226   | 236   | 240     |
| dimers %     | 83.1% | 86.8% | 88.2%   |



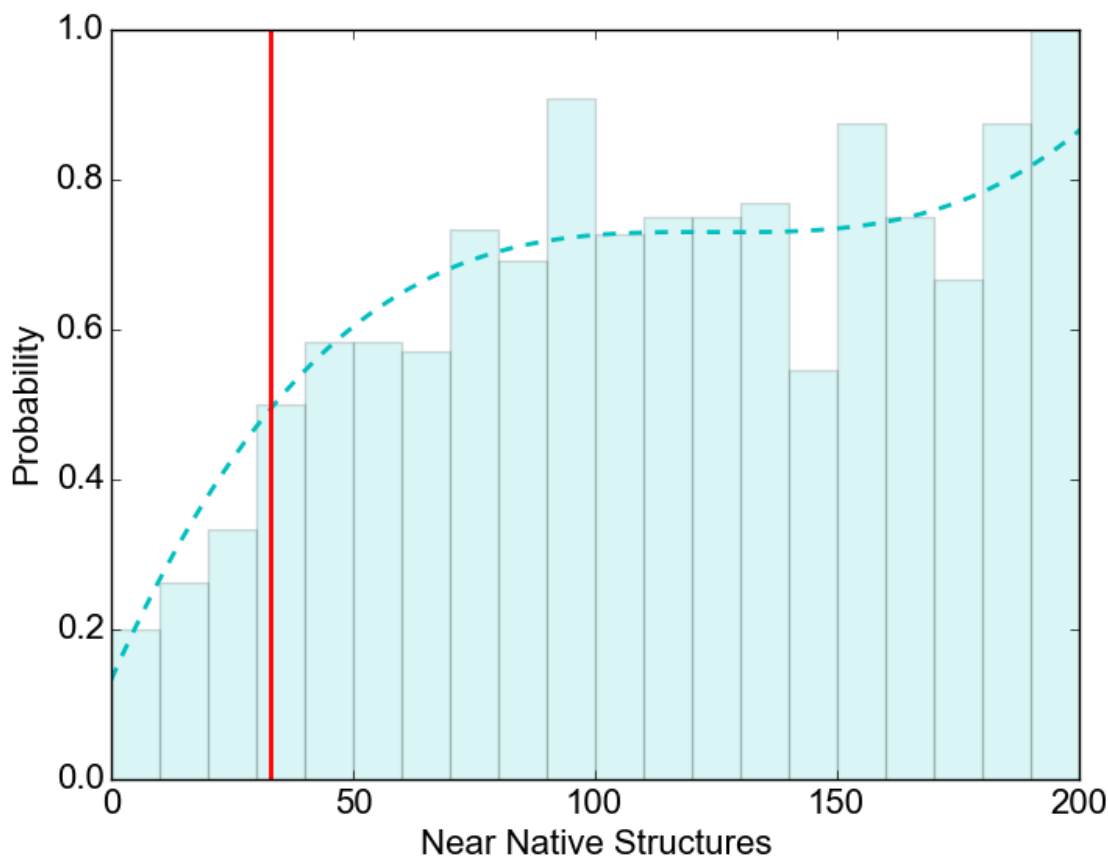

**Figure S1.**

**Figure S1.** Probability of biological dimer for combined training and test sets

**Figure S2.** (Page 12) Analysis of CAPRI target T70 (Modulator protein MzrA, PDB ID 4pwu). **(a)** Input for the analysis of the interface between chains A and B. **(b)** Status page showing the input and processed PDB files.

**Figure S3.** (Page 13) Results of the analysis of the interaction between chains A and B in CAPRI target T70 (Modulator protein MzrA, PDB ID 4pwu). **(a)** The result page shows the number  $N_{nn}$  of near-native docked structures among the lowest energy 1000 structures, indicated by a vertical red line, and the implied probability of the interface being in a biological dimer. Since for this dimer  $N_{nn} = 214$ , it is off the scale of the figure. Note the label for downloading the PyMOL session at the bottom of the page. **(b)** The PyMOL session downloaded shows the subunit 1 considered the receptor (solid grey), subunit 2 considered the ligand (solid green), and the top 100 lowest energy structures (green transparent cartoons). A large number but not all overlap with the native ligand positions.

[sign out](#)

a

## Dock

Job Name:

Accepted PDB Input: The 20 standard amino acids.

### Protein

PDB ID:

[Upload PDB](#)

Chain 1:

Chain 2:

[sign out](#)

b

**171138: T70:4pwu:A\_B**

**Status** finished ([View Models](#))

**Submitted** 2016-06-26 13:40:07

**Errors** (none reported)

**Rotations** 70000

### user input

rec

lig

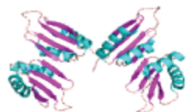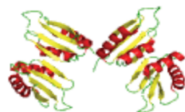

chains:  
A

chains:  
B

### processed files

rec

lig

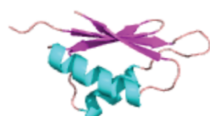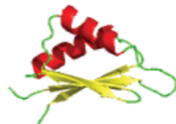

Figure S2

a

### Result: Likely Biological

Near-native count: 214  
Probability of being a biological dimer: 97%

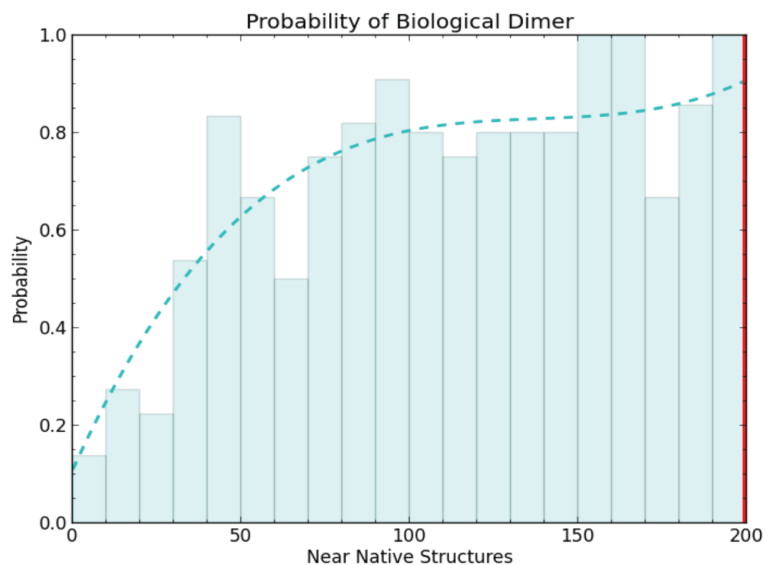

[Download PyMOL Session](#)

b

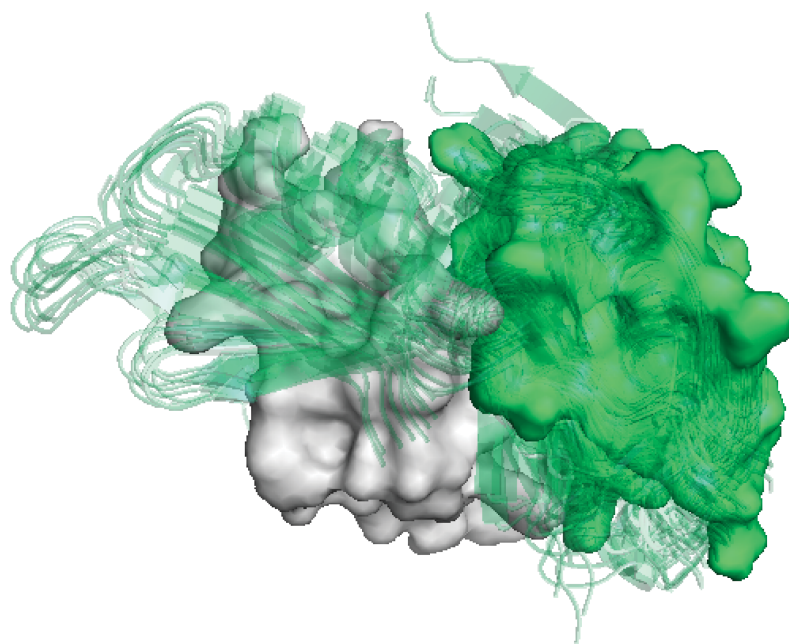

|        |   |   |   |   |   |
|--------|---|---|---|---|---|
| all    | A | S | H | L | C |
| rec    | A | S | H | L | C |
| lig    | A | S | H | L | C |
| lig.0  | A | S | H | L | C |
| lig.1  | A | S | H | L | C |
| lig.2  | A | S | H | L | C |
| lig.3  | A | S | H | L | C |
| lig.4  | A | S | H | L | C |
| lig.5  | A | S | H | L | C |
| lig.6  | A | S | H | L | C |
| lig.7  | A | S | H | L | C |
| lig.8  | A | S | H | L | C |
| lig.9  | A | S | H | L | C |
| lig.10 | A | S | H | L | C |
| lig.11 | A | S | H | L | C |
| lig.12 | A | S | H | L | C |
| lig.13 | A | S | H | L | C |
| lig.14 | A | S | H | L | C |
| lig.15 | A | S | H | L | C |
| lig.16 | A | S | H | L | C |
| lig.17 | A | S | H | L | C |
| lig.18 | A | S | H | L | C |
| lig.19 | A | S | H | L | C |
| lig.20 | A | S | H | L | C |
| lig.21 | A | S | H | L | C |

Mouse Mode 3-Button Viewing  
Buttons L M R Wheel  
& Keys Rota Move MovZ Slab  
Shft +Box -Box Clip MovS  
Ctrl +/- PkAt Pk1 MvSZ  
CtSh Sele Orig Clip MovZ  
SnglClk +/- Cent Menu  
DblClk Menu - PkAt  
Selecting Residues  
State 1/ 1

PyMOL>\_

Figure S3

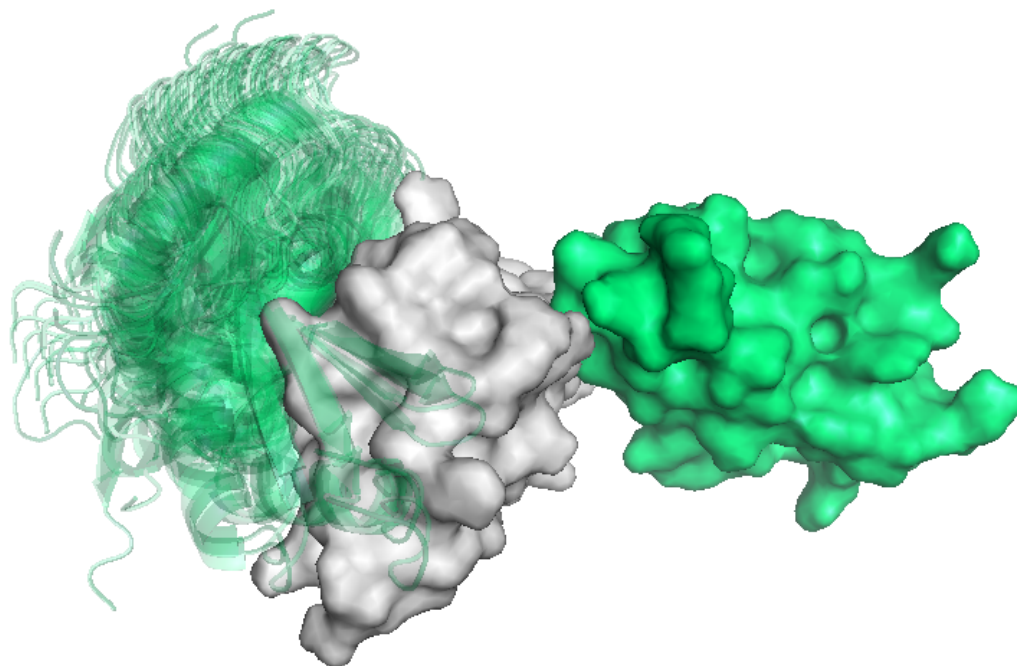

**Figure S4.** Results of the analysis of the interaction between chains A and C in CAPRI target T70 (Modulator protein MzrA, PDB ID 4pwu). The docked poses show strong interactions on the other side of subunit A. PyMOL generates a symmetry mate at that position, and the ClusPro result indicates a biological interface in addition to the one in the A:B dimer. This results in the stable A2:B2 tetramer (see text).

### Supplementary References

- [1] I.M. Nooren, J.M. Thornton, Structural characterisation and functional significance of transient protein-protein interactions, *J. Mol. Biol.* 325 (2003) 991-1018.
- [2] S. Dey, A. Pal, P. Chakrabarti, J. Janin, The subunit interfaces of weakly associated homodimeric proteins, *J. Mol. Biol.* 398 (2010) 146-60.
- [3] R.P. Bahadur, P. Chakrabarti, F. Rodier, J. Janin, Dissecting subunit interfaces in homodimeric proteins, *Proteins* 53 (2003) 708-19.
- [4] R.P. Bahadur, P. Chakrabarti, F. Rodier, J. Janin, A dissection of specific and non-specific protein - Protein interfaces, *J. Mol. Biol.* 336 (2004) 943-55.
- [5] J.M. Duarte, A. Srebniak, M.A. Scharer, G. Capitani, Protein interface classification by evolutionary analysis, *BMC Bioinformatics* 13 (2012) 334.
